# Supplementary material for: Divergent reactivities in fluoronation of allylic alcohols: synthesis of Z-fluoroalkenes via carbon–carbon bond cleavage
Source: PubMed Central journal article supplement — Chem Sci. 2017 Mar 20;8(5):3885–90. doi: 10.1039/c7sc00483d (PMC5578365; doi:10.1039/c7sc00483d), 2017-03-20

*Supporting Information for*

## **Fluorination of Allylic Alcohols: Synthesis of Z-Fluoroalkenes via Cleavage of Non-activated Carbon-Carbon Bond**

Tang-Lin Liu, Ji'En Wu and Yu Zhao\*

Department of Chemistry, National University of Singapore

3 Science Drive 3, Singapore 117543

### **Contents**

|                                                                                       |           |
|---------------------------------------------------------------------------------------|-----------|
| <b>I. General information.....</b>                                                    | <b>2</b>  |
| <b>II. Synthesis and characterization of 2a.....</b>                                  | <b>2</b>  |
| <b>III. General procedure for the synthesis of 4 .....</b>                            | <b>6</b>  |
| <b>IV. Characterization of compounds 4.....</b>                                       | <b>6</b>  |
| <b>V. General Procedure for the Synthesis of Compounds 8.....</b>                     | <b>18</b> |
| <b>VI. Characterization of Compounds 8.....</b>                                       | <b>18</b> |
| <b>VII. Synthesis and characterization of 10.....</b>                                 | <b>20</b> |
| <b>VIII. General Procedure for the Synthesis of Compounds 13 and 14.....</b>          | <b>21</b> |
| <b>IX. Characterization of Compounds 13.....</b>                                      | <b>21</b> |
| <b>X. Characterization of Compounds 14.....</b>                                       | <b>22</b> |
| <b>XI. Mechanistic studies.....</b>                                                   | <b>26</b> |
| <b>XII. Synthesis and characterization of 18-23 .....</b>                             | <b>30</b> |
| <b>XIII. References .....</b>                                                         | <b>36</b> |
| <b>XIV. <sup>1</sup>H NMR, <sup>13</sup>C NMR and <sup>19</sup>F NMR Spectra.....</b> | <b>37</b> |

## I. General information

$^1\text{H}$  NMR,  $^{13}\text{C}$  NMR and  $^{19}\text{F}$  NMR spectra were recorded on a Bruker 500 or 400 MHz spectrometer. Chemical shifts were reported in parts per million (ppm), and the residual solvent peak was used as an internal reference: proton (chloroform  $\delta$  7.26), carbon (chloroform  $\delta$  77.0) or fluorine ( $\text{CFCl}_3$   $\delta$  0.00). Multiplicity was indicated as follows: s (singlet), d (doublet), t (triplet), q (quartet), m (multiplet), and dd (doublet of doublet). Coupling constants were reported in Hertz (Hz). Low resolution mass spectra were obtained on a Finnigan/MAT 95XL-T mass spectrometer in EI mode. All high resolution mass spectra (HRMS) were obtained on a Finnigan/MAT 95XL-T spectrometer or micrOTOF-Q II 10269 spectrometer. For thin layer chromatography (TLC), Merck pre-coated TLC plates (Merck 60 F254) were used, and compounds were visualized with a UV light at 254 nm. Further visualization was achieved by staining with iodine, or potassium permanganate solution followed by heating using a heat gun. Flash chromatography separations were performed on Merck 60 (0.040-0.063 mm) mesh silica gel.

All the fluorination reactions were carried out under ambient atmosphere. Commercially available reagents were used as received without further purification. The substrates **1** and **8** were prepared by reduction of the corresponding enones which according to the literature procedure.<sup>1</sup>

## II. Synthesis and characterization of **2a**

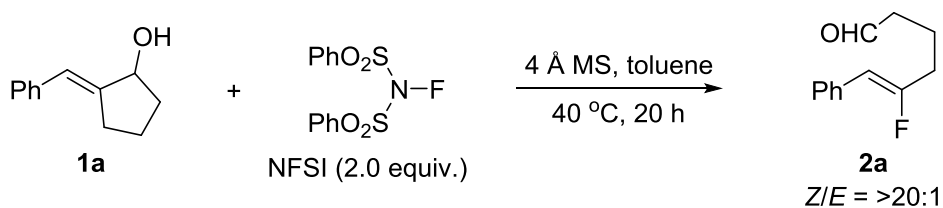

**(Z)-5-fluoro-6-phenylhex-5-enal (2a):** To a solution of allylic alcohol **1a** (34.8 mg, 0.200 mmol) in 1 mL of toluene were added 4 Å MS and NFSI (126 mg, 0.400 mmol). The resulting mixture was allowed to stir at 40 °C for 20 h. The crude reaction mixture was filtered through celite and the filtrate was concentrated to dryness and then directly

analyzed by  $^1\text{H}$  NMR to determine the *Z/E* ratio. The residue was then purified by column chromatography (hexanes:ethyl acetate = 5:1) to yield the product **2a** in 60% yield as an oil.

$^1\text{H}$  NMR ( $\text{CDCl}_3$ , TMS, 500 MHz):  $\delta$  9.80 (t,  $J = 1.0$  Hz, 1H), 7.47 (d,  $J = 7.5$  Hz, 2H), 7.32 (t,  $J = 7.5$  Hz, 2H), 7.22 (t,  $J = 7.5$  Hz, 1H), 5.50 (d,  $J = 39.0$  Hz, 1H), 2.56 (t,  $J = 7.5$  Hz, 2H), 2.43-2.36 (m, 2H), 1.98-1.94 (m, 2H).  $^{13}\text{C}$  NMR ( $\text{CDCl}_3$ , 125 MHz):  $\delta$  201.6, 159.6 (d,  $J = 264.8$  Hz), 133.4 (d,  $J = 2.5$  Hz), 128.4, 128.3 (d,  $J = 7.4$  Hz), 126.9 (d,  $J = 2.3$  Hz), 106.7 (d,  $J = 8.5$  Hz), 42.6, 32.2 (d,  $J = 26.9$  Hz), 18.8.  $^{19}\text{F}$  NMR ( $\text{CDCl}_3$ , 282 MHz):  $\delta$  -102.07 (dt,  $J = 39.2$  Hz, 18.6 Hz). HRMS (EI):  $m/z$  calcd. for  $\text{C}_{12}\text{H}_{13}\text{OF}$   $[\text{M}]^+$ : 192.0950; found: 192.0949.

The *Z* configuration of **2a** was determined by 2D ( $^1\text{H}$ - $^1\text{H}$  and  $^1\text{H}$ - $^{13}\text{C}$ ) NMR measurement as shown below (Figure S1).

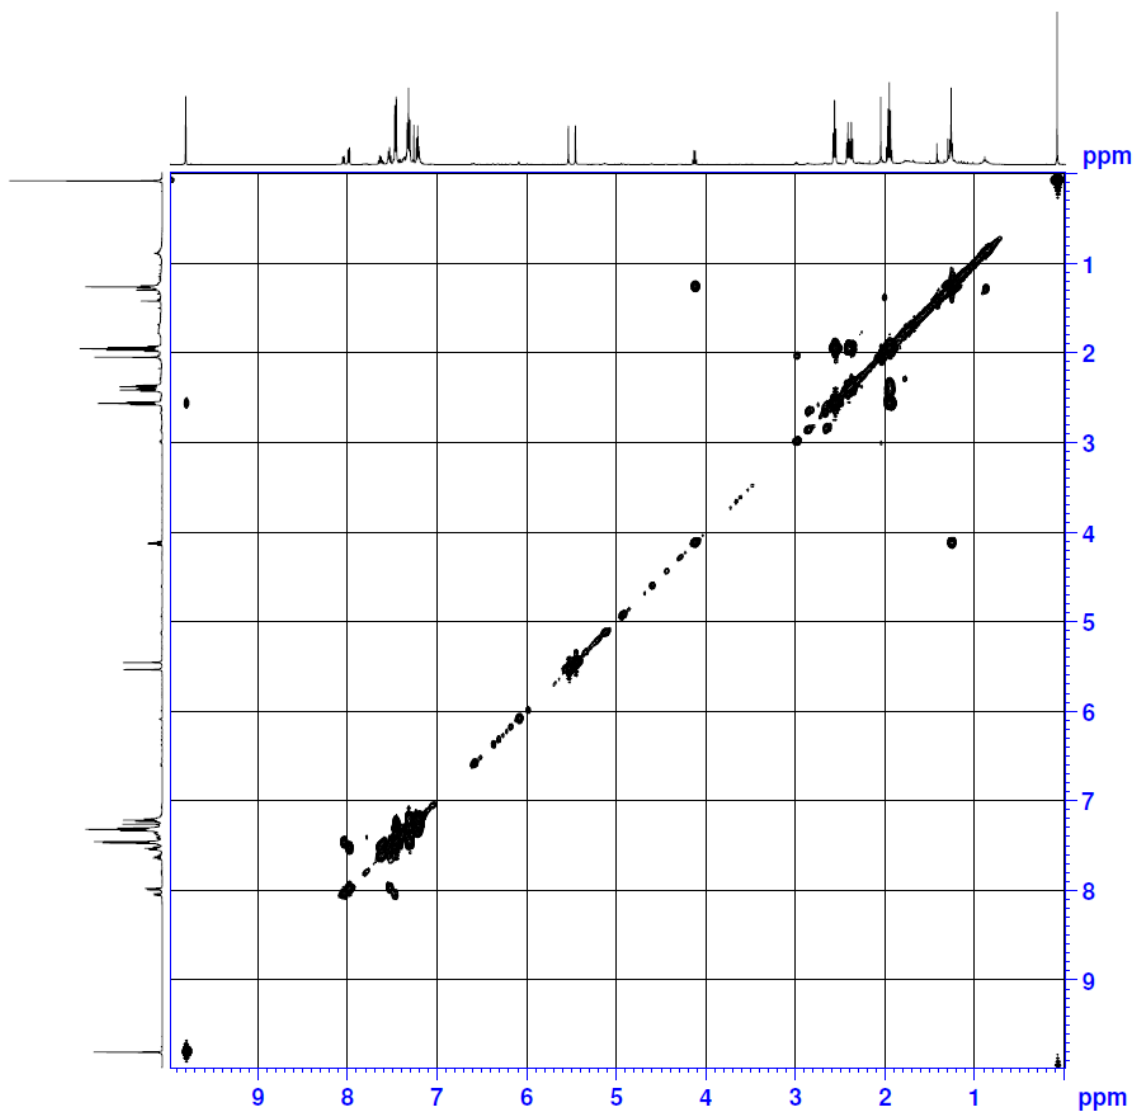

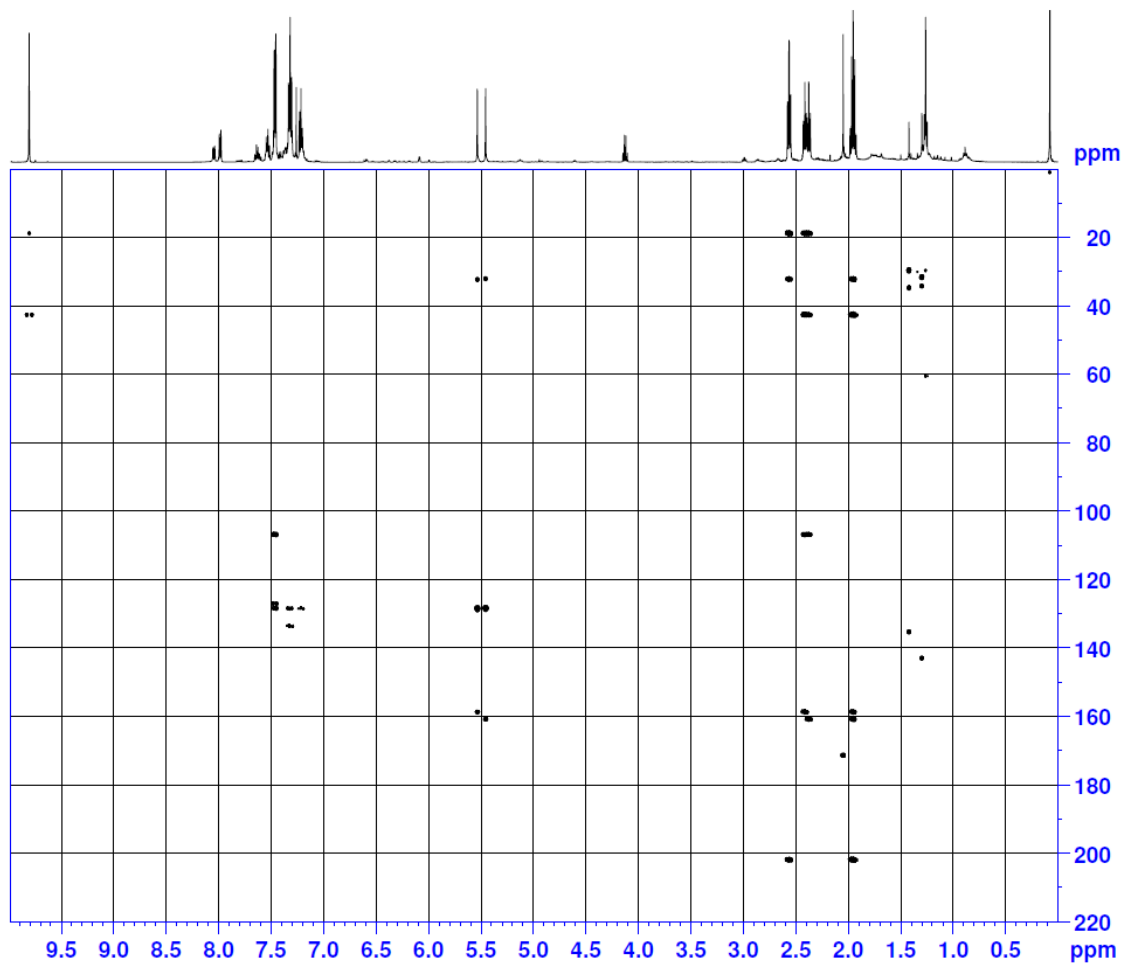

**Figure S1.** 2D ( $^1\text{H}$ - $^1\text{H}$  and  $^1\text{H}$ - $^{13}\text{C}$ ) NMR spectra of **2a**.

### III. General procedure for the synthesis of **4**

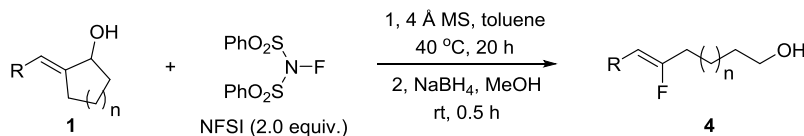

To a solution of allylic alcohols **1** (0.20 mmol) in 1 mL of toluene were added 4 Å MS and NFSI (0.40 mmol). The resulting mixture was allowed to stir at 40 °C for ~20 h. Once starting material was consumed (monitored by TLC), the mixture was filtered through celite and the filtrate was concentrated to dryness, which was then directly analyzed by <sup>1</sup>H NMR analysis to determine the *Z/E* ratios. 1 mL of methanol was then added followed by NaBH<sub>4</sub> (0.30 mmol). The resulting mixture was allowed to stir at ambient temperature for 0.5 h, quenched by saturated brine, extracted with ethyl acetate, concentrated and purified by column chromatography (hexanes:ethyl acetate) to afford the products **4** as an oil.

### IV. Characterization of compounds **4**

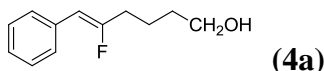

#### (Z)-5-fluoro-6-phenylhex-5-en-1-ol

The title compound was prepared according to the general procedure as described above in 82% yield. *Z/E* = >20:1. <sup>1</sup>H NMR (CDCl<sub>3</sub>, TMS, 500 MHz): δ 7.47 (d, *J* = 7.5 Hz, 2H), 7.31 (t, *J* = 7.5 Hz, 2H), 7.20 (t, *J* = 7.5 Hz, 1H), 5.49 (d, *J* = 39.5 Hz, 1H), 3.69 (t, *J* = 6.0 Hz, 2H), 2.41-2.34 (m, 2H), 1.72-1.65 (m, 4H), 1.57 (brs, 1H). <sup>13</sup>C NMR (CDCl<sub>3</sub>, 125 MHz): δ 160.7 (d, *J* = 264.9 Hz), 133.7 (d, *J* = 2.4 Hz), 128.4, 128.2 (d, *J* = 7.3 Hz), 126.6 (d, *J* = 2.1 Hz), 106.0 (d, *J* = 8.8 Hz), 62.5, 32.8 (d, *J* = 26.5 Hz), 31.9, 22.6. <sup>19</sup>F NMR (CDCl<sub>3</sub>, 282 MHz): δ -101.18 (dt, *J* = 39.5 Hz, 18.0 Hz). HRMS (EI): *m/z* calcd. for C<sub>12</sub>H<sub>15</sub>OF [M]<sup>+</sup>: 194.1107; found: 194.1112.

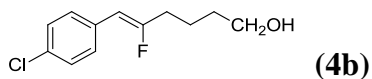

**(Z)-6-(4-chlorophenyl)-5-fluorohex-5-en-1-ol**

The title compound was prepared according to the general procedure as described above in 53% yield. *Z/E* = 12:1.  $^1\text{H NMR}$  ( $\text{CDCl}_3$ , TMS, 500 MHz):  $\delta$  7.38 (d,  $J$  = 8.5 Hz, 2H), 7.27 (d,  $J$  = 8.5 Hz, 2H), 5.44 (d,  $J$  = 39.0 Hz, 1H), 3.69 (t,  $J$  = 6.0 Hz, 2H), 2.40-2.33 (m, 2H), 1.71-1.64 (m, 4H), 1.54 (brs, 1H).  $^{13}\text{C NMR}$  ( $\text{CDCl}_3$ , 125 MHz):  $\delta$  161.2 (d,  $J$  = 265.9 Hz), 132.2, 129.5 (d,  $J$  = 7.6 Hz), 128.5, 105.0 (d,  $J$  = 8.6 Hz), 62.5, 32.8 (d,  $J$  = 26.4 Hz), 31.8, 22.6.  $^{19}\text{F NMR}$  ( $\text{CDCl}_3$ , 282 MHz):  $\delta$  -100.19 (dt,  $J$  = 38.9 Hz, 18.0 Hz). **HRMS (EI)**: *m/z* calcd. for  $\text{C}_{12}\text{H}_{14}\text{OCIF}$  [ $\text{M}$ ] $^+$ : 228.0717; found: 228.0712.

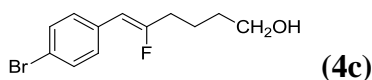

**(Z)-6-(4-bromophenyl)-5-fluorohex-5-en-1-ol**

The title compound was prepared according to the general procedure as described above in 63% yield. *Z/E* = 15:1.  $^1\text{H NMR}$  ( $\text{CDCl}_3$ , TMS, 500 MHz):  $\delta$  7.42 (d,  $J$  = 8.5 Hz, 2H), 7.32 (d,  $J$  = 8.5 Hz, 2H), 5.43 (d,  $J$  = 39.0 Hz, 1H), 3.69 (t,  $J$  = 6.0 Hz, 2H), 2.37-2.32 (m, 2H), 1.71-1.64 (m, 4H), 1.55 (brs, 1H).  $^{13}\text{C NMR}$  ( $\text{CDCl}_3$ , 125 MHz):  $\delta$  161.3 (d,  $J$  = 266.3 Hz), 132.7, 131.5, 129.8 (d,  $J$  = 7.6 Hz), 120.3 (d,  $J$  = 3.5 Hz), 105.1 (d,  $J$  = 8.8 Hz), 62.5, 32.8 (d,  $J$  = 26.3 Hz), 31.8, 22.6.  $^{19}\text{F NMR}$  ( $\text{CDCl}_3$ , 282 MHz):  $\delta$  -99.77 (dt,  $J$  = 38.6 Hz, 18.3 Hz). **HRMS (EI)**: *m/z* calcd. for  $\text{C}_{12}\text{H}_{14}\text{OBrF}$  [ $\text{M}$ ] $^+$ : 272.0212; found: 272.0201.

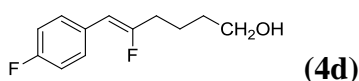

**(Z)-5-fluoro-6-(4-fluorophenyl)hex-5-en-1-ol**

The title compound was prepared according to the general procedure as described above in 91% yield. *Z/E* = 17:1.  $^1\text{H NMR}$  ( $\text{CDCl}_3$ , TMS, 500 MHz):  $\delta$  7.44-7.41 (m, 2H), 7.01-6.97 (m, 2H), 5.44 (d,  $J$  = 39.0 Hz, 1H), 3.69 (t,  $J$  = 6.0 Hz, 2H), 2.39-2.32 (m, 2H), 1.71-1.66 (m, 5H).  $^{13}\text{C NMR}$  ( $\text{CDCl}_3$ , 125 MHz):  $\delta$  161.4 (d,  $J$  = 244.8 Hz), 160.4 (d,  $J$  = 264.3 Hz), 129.8 (t,  $J$  = 7.6 Hz), 115.2 (d,  $J$  = 21.3 Hz), 104.9 (d,  $J$  = 8.9 Hz), 62.5, 32.7

(d,  $J = 26.5$  Hz), 31.8, 22.6.  $^{19}\text{F}$  NMR ( $\text{CDCl}_3$ , 282 MHz):  $\delta$  -102.48 (dt,  $J = 39.5$  Hz, 18.1 Hz), -115.04 - -115.15 (m, 1F). HRMS (EI):  $m/z$  calcd. for  $\text{C}_{12}\text{H}_{14}\text{OF}_2$   $[\text{M}]^+$ : 212.1013; found: 212.1016.

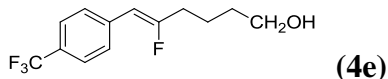

#### **(Z)-5-fluoro-6-(4-(trifluoromethyl)phenyl)hex-5-en-1-ol**

The title compound was prepared according to the general procedure as described above in 65% yield.  $Z/E = 10:1$ .  $^1\text{H}$  NMR ( $\text{CDCl}_3$ , TMS, 500 MHz):  $\delta$  7.55 (m, 4H), 5.54 (d,  $J = 38.5$  Hz, 1H), 3.71 (t,  $J = 6.0$  Hz, 2H), 2.43-2.37 (m, 2H), 1.74-1.66 (m, 4H), 1.60 (brs, 1H).  $^{13}\text{C}$  NMR ( $\text{CDCl}_3$ , 125 MHz):  $\delta$  162.5 (d,  $J = 268.4$  Hz), 137.3, 128.3 (d,  $J = 7.6$  Hz), 125.3 (q,  $J = 3.9$  Hz), 124.2 (q,  $J = 272.5$  Hz), 115.9, 105.1 (d,  $J = 8.3$  Hz), 62.5, 32.8 (d,  $J = 26.1$  Hz), 31.8, 22.6.  $^{19}\text{F}$  NMR ( $\text{CDCl}_3$ , 282 MHz):  $\delta$  -62.51 (s, 3F), -97.63 (dt,  $J = 38.6$  Hz, 18.0 Hz). HRMS (EI):  $m/z$  calcd. for  $\text{C}_{13}\text{H}_{14}\text{OF}_4$   $[\text{M}]^+$ : 262.0981; found: 262.0983.

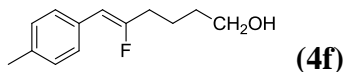

#### **(Z)-5-fluoro-6-(p-tolyl)hex-5-en-1-ol**

The title compound was prepared according to the general procedure as described above in 67% yield.  $Z/E = 14:1$ .  $^1\text{H}$  NMR ( $\text{CDCl}_3$ , TMS, 500 MHz):  $\delta$  7.36 (d,  $J = 8.0$  Hz, 2H), 7.12 (d,  $J = 8.0$  Hz, 2H), 5.45 (d,  $J = 39.5$  Hz, 1H), 3.69 (t,  $J = 6.0$  Hz, 2H), 2.39-2.33 (m, 5H), 1.69-1.67 (m, 4H), 1.49 (brs, 1H).  $^{13}\text{C}$  NMR ( $\text{CDCl}_3$ , 125 MHz):  $\delta$  160.1 (d,  $J = 263.8$  Hz), 136.4 (d,  $J = 2.4$  Hz), 130.9, 129.1, 128.1 (d,  $J = 7.3$  Hz), 105.8 (d,  $J = 8.9$  Hz), 62.5, 32.8 (d,  $J = 26.6$  Hz), 31.9, 22.7, 21.1.  $^{19}\text{F}$  NMR ( $\text{CDCl}_3$ , 282 MHz):  $\delta$  -102.24 (dt,  $J = 39.8$  Hz, 18.0 Hz). HRMS (EI):  $m/z$  calcd. for  $\text{C}_{13}\text{H}_{17}\text{OF}$   $[\text{M}]^+$ : 208.1263; found: 208.1263.

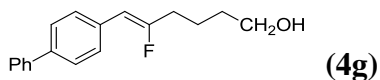

#### **(Z)-6-([1,1'-biphenyl]-4-yl)-5-fluorohex-5-en-1-ol**



The title compound was prepared according to the general procedure as described above in 93% yield. *Z/E* = >20:1.  $^1\text{H NMR}$  ( $\text{CDCl}_3$ , TMS, 500 MHz):  $\delta$  7.61-7.53 (m, 6H), 7.44 (t,  $J = 7.5$  Hz, 2H), 7.34 (t,  $J = 7.5$  Hz, 1H), 5.53 (d,  $J = 39.5$  Hz, 1H), 3.71 (t,  $J = 6.0$  Hz, 2H), 2.43-2.37 (m, 2H), 1.73-1.67 (m, 4H), 1.59 (brs, 1H).  $^{13}\text{C NMR}$  ( $\text{CDCl}_3$ , 125 MHz):  $\delta$  160.9 (d,  $J = 265.4$  Hz), 140.8, 139.4, 132.8, 128.75, 128.65 (d,  $J = 7.4$  Hz), 127.2, 127.0, 126.9, 105.7 (d,  $J = 8.6$  Hz), 62.6, 32.9 (d,  $J = 26.4$  Hz), 31.9, 22.7.  $^{19}\text{F NMR}$  ( $\text{CDCl}_3$ , 282 MHz):  $\delta$  -100.58 (dt,  $J = 39.5$  Hz, 18.0 Hz). **HRMS (EI)**:  $m/z$  calcd. for  $\text{C}_{18}\text{H}_{19}\text{OF}$   $[\text{M}]^+$ : 270.1420; found: 270.1419.

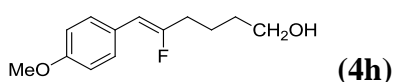

**(Z)-5-fluoro-6-(4-methoxyphenyl)hex-5-en-1-ol**

The title compound was prepared according to the general procedure as described above in 76% yield. *Z/E* = 15:1.  $^1\text{H NMR}$  ( $\text{CDCl}_3$ , TMS, 500 MHz):  $\delta$  7.40 (d,  $J = 8.5$  Hz, 2H), 6.85 (d,  $J = 8.5$  Hz, 2H), 5.42 (d,  $J = 40.0$  Hz, 1H), 3.80 (s, 3H), 3.69 (t,  $J = 6.0$  Hz, 2H), 2.38-2.32 (m, 2H), 1.71-1.63 (m, 4H), 1.54 (brs, 1H).  $^{13}\text{C NMR}$  ( $\text{CDCl}_3$ , 125 MHz):  $\delta$  159.3 (d,  $J = 263.8$  Hz), 158.2, 129.4 (d,  $J = 7.4$  Hz), 126.5 (d,  $J = 2.3$  Hz), 113.8, 105.4 (d,  $J = 9.1$  Hz), 62.5, 55.2, 32.7 (d,  $J = 26.6$  Hz), 31.9, 22.7.  $^{19}\text{F NMR}$  ( $\text{CDCl}_3$ , 282 MHz):  $\delta$  -104.14 (dt,  $J = 39.8$  Hz, 18.3 Hz). **HRMS (EI)**:  $m/z$  calcd. for  $\text{C}_{13}\text{H}_{17}\text{O}_2\text{F}$   $[\text{M}]^+$ : 224.1213; found: 224.1213.

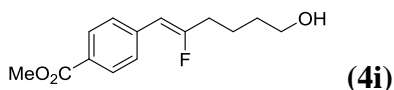

**methyl (Z)-4-(2-fluoro-6-hydroxyhex-1-en-1-yl)benzoate**

The title compound was prepared according to the general procedure as described above in 80% yield. *Z/E* = >20:1.  $^1\text{H NMR}$  ( $\text{CDCl}_3$ , TMS, 400 MHz):  $\delta$  7.97 (d,  $J = 8.4$  Hz, 2H), 7.51 (t,  $J = 8.4$  Hz, 2H), 5.54 (d,  $J = 38.8$  Hz, 1H), 3.90 (s, 3H), 3.69 (t,  $J = 6.0$  Hz, 2H), 2.43-2.35 (m, 2H), 1.73-1.56 (m, 5H).  $^{13}\text{C NMR}$  ( $\text{CDCl}_3$ , 100 MHz):  $\delta$  166.9, 162.6 (d,  $J = 268.8$  Hz), 138.4 (d,  $J = 2.5$  Hz), 129.7, 128.1 (d,  $J = 7.7$  Hz), 105.5 (d,  $J = 8.3$  Hz), 62.5, 52.0, 33.9 (d,  $J = 26.1$  Hz), 31.9, 22.6.  $^{19}\text{F NMR}$  ( $\text{CDCl}_3$ , 376 MHz):  $\delta$  -96.9 (dt,  $J = 39.1$  Hz, 18.0 Hz).

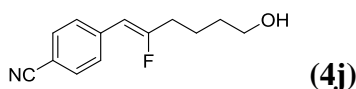

**(Z)-4-(2-fluoro-6-hydroxyhex-1-en-1-yl)benzonitrile**

The title compound was prepared according to the general procedure as described above in 68% yield. *Z/E* = >20:1.  $^1\text{H NMR}$  ( $\text{CDCl}_3$ , TMS, 400 MHz):  $\delta$  7.57 (d,  $J = 8.4$  Hz, 2H), 7.52 (d,  $J = 8.4$  Hz, 2H), 5.52 (d,  $J = 38.4$  Hz, 1H), 3.59 (t,  $J = 6.0$  Hz, 2H), 2.44-2.36 (m, 2H), 1.73-1.50 (m, 5H).  $^{13}\text{C NMR}$  ( $\text{CDCl}_3$ , 100 MHz):  $\delta$  163.6 (d,  $J = 270.4$  Hz), 138.4 (d,  $J = 2.5$  Hz), 132.2, 128.6 (d,  $J = 8.0$  Hz), 119.0, 109.8 (d,  $J = 3.0$  Hz), 105.1 (d,  $J = 8.1$  Hz), 62.4, 32.9 (d,  $J = 25.8$  Hz), 31.8, 22.6.  $^{19}\text{F NMR}$  ( $\text{CDCl}_3$ , 376 MHz):  $\delta$  -95.18 (dt,  $J = 37.2$  Hz, 18.4 Hz).

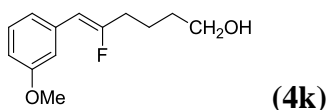

**(Z)-5-fluoro-6-(3-methoxyphenyl)hex-5-en-1-ol**

The title compound was prepared according to the general procedure as described above in 82% yield. *Z/E* = 11:1.  $^1\text{H NMR}$  ( $\text{CDCl}_3$ , TMS, 500 MHz):  $\delta$  7.22 (t,  $J = 8.0$  Hz, 1H), 7.06-7.02 (m, 2H), 6.78-6.76 (m, 1H), 5.46 (d,  $J = 39.0$  Hz, 1H), 3.81 (s, 3H), 3.69 (t,  $J = 6.0$  Hz, 2H), 2.40-2.33 (m, 2H), 1.70-1.66 (m, 5H).  $^{13}\text{C NMR}$  ( $\text{CDCl}_3$ , 125 MHz):  $\delta$  160.9 (d,  $J = 265.5$  Hz), 159.5, 129.3, 126.4, 120.9 (d,  $J = 6.9$  Hz), 113.6 (d,  $J = 8.1$  Hz), 112.5, 106.0 (d,  $J = 8.3$  Hz), 62.5, 55.2, 32.8 (d,  $J = 26.5$  Hz), 31.9, 22.6.  $^{19}\text{F NMR}$  ( $\text{CDCl}_3$ , 282 MHz):  $\delta$  -100.31 (dt,  $J = 39.2$  Hz, 18.0 Hz). **HRMS (EI)**:  $m/z$  calcd. for  $\text{C}_{13}\text{H}_{17}\text{O}_2\text{F}$   $[\text{M}]^+$ : 224.1213; found: 224.1213.

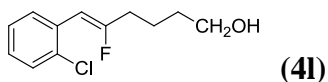

**(Z)-6-(3-chlorophenyl)-5-fluorohex-5-en-1-ol**

The title compound was prepared according to the general procedure as described above in 22% yield. *Z/E* = 9:1.  $^1\text{H NMR}$  ( $\text{CDCl}_3$ , TMS, 500 MHz):  $\delta$  7.78 (d,  $J = 8.0$  Hz, 1H), 7.36 (d,  $J = 8.0$  Hz, 1H), 7.23 (t,  $J = 8.0$  Hz, 1H), 7.14 (t,  $J = 8.0$  Hz, 1H), 5.89 (d,  $J =$

38.5 Hz, 1H), 3.71 (t,  $J = 6.0$  Hz, 2H), 2.45-2.39 (m, 2H), 1.74-1.67 (m, 4H).  $^{13}\text{C}$  NMR (CDCl<sub>3</sub>, 125 MHz):  $\delta$  161.8 (d,  $J = 267.3$  Hz), 132.3, 131.6, 130.3 (d,  $J = 11.9$  Hz), 129.3, 127.8, 126.6, 102.1 (d,  $J = 7.3$  Hz), 62.5, 32.9 (d,  $J = 26.4$  Hz), 31.9, 22.6.  $^{19}\text{F}$  NMR (CDCl<sub>3</sub>, 282 MHz):  $\delta$  -100.82 (dt,  $J = J = 39.4$  Hz, 18.0 Hz). HRMS (EI):  $m/z$  calcd. for C<sub>12</sub>H<sub>14</sub>OCIF [M]<sup>+</sup>: 228.0717; found: 228.0714.

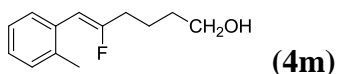

**(Z)-5-fluoro-6-(o-tolyl)hex-5-en-1-ol**

The title compound was prepared according to the general procedure as described above in 42% yield.  $Z/E = 9:1$ .  $^1\text{H}$  NMR (CDCl<sub>3</sub>, TMS, 500 MHz):  $\delta$  7.60 (d,  $J = 7.5$  Hz, 1H), 7.19-7.13 (m, 3H), 5.61 (d,  $J = 38.5$  Hz, 1H), 3.71 (t,  $J = 6.0$  Hz, 2H), 2.42-2.37 (m, 2H), 2.30 (s, 3H), 1.74-1.67 (m, 4H).  $^{13}\text{C}$  NMR (CDCl<sub>3</sub>, 125 MHz):  $\delta$  160.2 (d,  $J = 263.5$  Hz), 135.3, 132.2, 129.9, 129.1 (d,  $J = 9.4$  Hz), 126.8, 125.8, 103.4 (d,  $J = 10.0$  Hz), 62.5, 32.8 (d,  $J = 26.9$  Hz), 31.9, 22.7, 20.1.  $^{19}\text{F}$  NMR (CDCl<sub>3</sub>, 282 MHz):  $\delta$  -103.61 (dt,  $J = 38.4$  Hz, 18.0 Hz). HRMS (EI):  $m/z$  calcd. for C<sub>13</sub>H<sub>17</sub>OF [M]<sup>+</sup>: 208.1263; found: 208.1267.

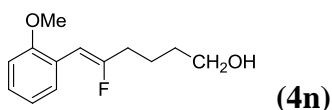

**(Z)-5-fluoro-6-(4-methoxyphenyl)hex-5-en-1-ol**

The title compound was prepared according to the general procedure as described above in 50% yield.  $Z/E = 9:1$ .  $^1\text{H}$  NMR (CDCl<sub>3</sub>, TMS, 500 MHz):  $\delta$  7.75 (d,  $J = 8.0$  Hz, 1H), 7.19 (t,  $J = 8.0$  Hz, 1H), 6.94 (t,  $J = 8.0$  Hz, 1H), 6.85 (d,  $J = 8.0$  Hz, 1H), 5.90 (d,  $J = 40.5$  Hz, 1H), 3.83 (s, 3H), 3.69 (t,  $J = 6.0$  Hz, 2H), 2.42-2.36 (m, 2H), 1.71-1.58 (m, 5H).  $^{13}\text{C}$  NMR (CDCl<sub>3</sub>, 125 MHz):  $\delta$  160.6 (d,  $J = 263.1$  Hz), 155.8, 129.7 (d,  $J = 12.5$  Hz), 127.8, 122.5, 120.6, 110.4, 99.3 (d,  $J = 7.3$  Hz), 62.6, 55.5, 33.0 (d,  $J = 26.9$  Hz), 31.9, 22.7.  $^{19}\text{F}$  NMR (CDCl<sub>3</sub>, 282 MHz):  $\delta$  -102.85 (dt,  $J = 40.6$  Hz, 18.0 Hz). HRMS (EI):  $m/z$  calcd. for C<sub>13</sub>H<sub>17</sub>O<sub>2</sub>F [M]<sup>+</sup>: 224.1213; found: 224.1222.

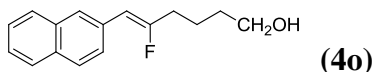

**(Z)-5-fluoro-6-(naphthalen-2-yl)hex-5-en-1-ol**

The title compound was prepared according to the general procedure as described above in 60% yield. *Z/E* = 13:1.  $^1\text{H NMR}$  ( $\text{CDCl}_3$ , TMS, 500 MHz):  $\delta$  7.91 (s, 1H), 7.82-7.79 (m, 3H), 7.69-7.67 (m, 1H), 7.48-7.45 (m, 2H), 5.65 (d,  $J = 39.5$  Hz, 1H), 3.69 (t,  $J = 6.0$  Hz, 2H), 2.45-2.39 (m, 2H), 1.86 (brs, 1H), 1.75-1.67 (m, 4H).  $^{13}\text{C NMR}$  ( $\text{CDCl}_3$ , 125 MHz):  $\delta$  161.0 (d,  $J = 265.5$  Hz), 133.4, 132.2, 131.3 (d,  $J = 2.5$  Hz), 127.9, 127.8, 127.4, 126.9 (d,  $J = 7.4$  Hz), 126.5 (d,  $J = 7.6$  Hz), 126.0, 125.6, 106.05 (d,  $J = 8.3$  Hz), 62.4, 32.8 (d,  $J = 26.4$  Hz), 31.8, 22.6.  $^{19}\text{F NMR}$  ( $\text{CDCl}_3$ , 282 MHz):  $\delta$  -100.44 (dt,  $J = 39.5$  Hz, 18.3 Hz). **HRMS (EI)**: *m/z* calcd. for  $\text{C}_{16}\text{H}_{17}\text{OF}$   $[\text{M}]^+$ : 244.1263; found: 244.1263.

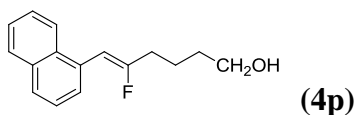

**(Z)-5-fluoro-6-(naphthalen-2-yl)hex-5-en-1-ol**

The title compound was prepared according to the general procedure as described above in 64% yield. *Z/E* = 9:1.  $^1\text{H NMR}$  ( $\text{CDCl}_3$ , TMS, 500 MHz):  $\delta$  8.03 (d,  $J = 8.0$  Hz, 1H), 7.85 (d,  $J = 8.5$  Hz, 1H), 7.78-7.76 (m, 2H), 7.54-7.47 (m, 3H), 6.14 (d,  $J = 37.5$  Hz, 1H), 3.72 (t,  $J = 6.0$  Hz, 2H), 2.53-2.47 (m, 2H), 1.79-1.73 (m, 5H).  $^{13}\text{C NMR}$  ( $\text{CDCl}_3$ , 125 MHz):  $\delta$  161.1 (d,  $J = 263.6$  Hz), 133.6, 131.2, 129.7, 128.5, 127.3, 127.1 (d,  $J = 8.0$  Hz), 125.9, 125.5, 125.4, 124.0, 102.6 (d,  $J = 10.8$  Hz), 62.4, 32.8 (d,  $J = 26.8$  Hz), 31.9, 22.7.  $^{19}\text{F NMR}$  ( $\text{CDCl}_3$ , 282 MHz):  $\delta$  -102.35 (dt,  $J = 36.9$  Hz, 17.8 Hz). **HRMS (EI)**: *m/z* calcd. for  $\text{C}_{16}\text{H}_{17}\text{OF}$   $[\text{M}]^+$ : 244.1263; found: 244.1263.

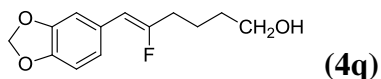

**(Z)-6-(benzo[d][1,3]dioxol-5-yl)-5-fluorohex-5-en-1-ol**

The title compound was prepared according to the general procedure as described above in 54% yield. *Z/E* = >20:1.  $^1\text{H NMR}$  ( $\text{CDCl}_3$ , TMS, 500 MHz):  $\delta$  7.09 (s, 1H), 6.84 (d,  $J = 8.0$  Hz, 1H), 6.75 (d,  $J = 8.0$  Hz, 1H), 5.94 (s, 2H), 5.39 (d,  $J = 39.0$  Hz, 1H), 3.69 (t,  $J = 6.0$  Hz, 2H), 2.36-2.31 (m, 2H), 1.68-1.66 (m, 4H), 1.57 (brs, 1H).  $^{13}\text{C NMR}$  ( $\text{CDCl}_3$ , 125 MHz):  $\delta$  159.5 (d,  $J = 263.1$  Hz), 147.7, 127.9, 122.1 (d,  $J = 5.9$  Hz), 108.5 (d,  $J = 9.8$  Hz), 108.2, 105.7 (d,  $J = 8.8$  Hz), 100.9, 62.6, 32.7 (d,  $J = 26.6$  Hz), 31.9, 31.6, 22.7.

$^{19}\text{F}$  NMR ( $\text{CDCl}_3$ , 282 MHz):  $\delta$  -103.20 (dt,  $J = 39.2$  Hz, 18.0 Hz). HRMS (EI):  $m/z$  calcd. for  $\text{C}_{13}\text{H}_{15}\text{O}_3\text{F}$   $[\text{M}]^+$ : 238.1005; found: 238.1004.

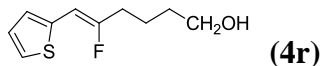

**(Z)-5-fluoro-6-(naphthalen-2-yl)hex-5-en-1-ol**

The title compound was prepared according to the general procedure as described above in 60% yield.  $Z/E = 20:1$ .  $^1\text{H}$  NMR ( $\text{CDCl}_3$ , TMS, 500 MHz):  $\delta$  7.22 (d,  $J = 5.0$  Hz, 1H), 7.00-6.96 (m, 2H), 5.82 (d,  $J = 38.5$  Hz, 1H), 3.69 (t,  $J = 6.0$  Hz, 2H), 2.41-2.35 (m, 2H), 1.69-1.65 (m, 5H).  $^{13}\text{C}$  NMR ( $\text{CDCl}_3$ , 125 MHz):  $\delta$  159.4 (d,  $J = 263.9$  Hz), 135.9 (d,  $J = 3.5$  Hz), 126.5, 125.6 (d,  $J = 3.8$  Hz), 124.9 (d,  $J = 9.0$  Hz), 100.7 (d,  $J = 12.8$  Hz), 62.5, 32.1 (d,  $J = 25.5$  Hz), 31.8, 22.5.  $^{19}\text{F}$  NMR ( $\text{CDCl}_3$ , 282 MHz):  $\delta$  -97.93 (dtd,  $J = 38.4$  Hz, 17.8 Hz, 1.7 Hz). HRMS (EI):  $m/z$  calcd. for  $\text{C}_{10}\text{H}_{13}\text{OFS}$   $[\text{M}]^+$ : 200.0671; found: 200.0672.

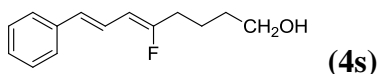

**(5Z,7E)-5-fluoro-8-phenylocta-5,7-dien-1-ol**

The title compound was prepared according to the general procedure as described above in 56% yield.  $Z/E = 6:1$ .  $^1\text{H}$  NMR ( $\text{CDCl}_3$ , TMS, 500 MHz):  $\delta$  7.40 (d,  $J = 7.5$  Hz, 2H), 7.30 (t,  $J = 7.5$  Hz, 2H), 7.21 (t,  $J = 7.5$  Hz, 1H), 7.02 (dd,  $J = 16.5$  Hz, 10.5 Hz, 1H), 6.44 (d,  $J = 16.5$  Hz, 1H), 5.43 (dd,  $J = 35.5$  Hz, 10.5 Hz, 1H), 3.69 (t,  $J = 6.0$  Hz, 2H), 2.34-2.29 (m, 2H), 1.66-1.64 (m, 4H), 1.57 (brs, 1H).  $^{13}\text{C}$  NMR ( $\text{CDCl}_3$ , 125 MHz):  $\delta$  161.0 (d,  $J = 263.1$  Hz), 137.5, 130.0 (d,  $J = 4.5$  Hz), 128.6, 127.3, 126.2, 120.7 (d,  $J = 5.5$  Hz), 107.2 (d,  $J = 12.0$  Hz), 62.5, 32.0 (d,  $J = 26.1$  Hz), 31.9, 22.5.  $^{19}\text{F}$  NMR ( $\text{CDCl}_3$ , 282 MHz):  $\delta$  -103.12 (dt,  $J = 35.3$  Hz, 17.8 Hz). HRMS (EI):  $m/z$  calcd. for  $\text{C}_{14}\text{H}_{17}\text{OF}$   $[\text{M}]^+$ : 220.1263; found: 220.1263.

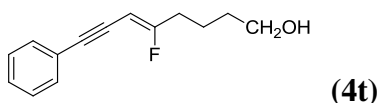

**(Z)-5-fluoro-8-phenyloct-5-en-7-yn-1-ol**

The title compound was prepared according to the general procedure as described above in 69% yield. *Z/E* = >20:1.  $^1\text{H NMR}$  ( $\text{CDCl}_3$ , TMS, 500 MHz)  $\delta$  7.44 (m, 2H), 7.30 (m, 3H), 5.03 (d,  $J = 33.5$  Hz, 1H), 3.68 (t,  $J = 6.0$  Hz, 2H), 2.35-2.32 (m, 2H), 1.66-1.64 (m, 4H), 1.56 (brs, 1H).  $^{13}\text{C NMR}$  ( $\text{CDCl}_3$ , 125 MHz)  $\delta$  169.0 (d,  $J = 270.4$  Hz), 131.4, 128.2, 128.1, 123.3, 93.0 (d,  $J = 5.6$  Hz), 87.9 (d,  $J = 14.6$  Hz), 81.6, 62.4, 31.9 (d,  $J = 24.5$  Hz), 31.7, 22.3.  $^{19}\text{F NMR}$  ( $\text{CDCl}_3$ , 282 MHz)  $\delta$  -88.10 (dt,  $J = 33.3$  Hz, 17.2 Hz). **HRMS (EI)**: *m/z* calcd. for  $\text{C}_{14}\text{H}_{15}\text{OF}$   $[\text{M}]^+$ : 218.1107; found: 218.1110.

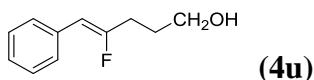

#### **(Z)-4-fluoro-5-phenylpent-4-en-1-ol**

The title compound was prepared according to the general procedure as described above in 83% yield. *Z/E* = 5:1.  $^1\text{H NMR}$  ( $\text{CDCl}_3$ , TMS, 500 MHz):  $\delta$  7.47 (d,  $J = 7.5$  Hz, 2H), 7.32 (t,  $J = 7.5$  Hz, 2H), 7.21 (t,  $J = 7.5$  Hz, 1H), 5.52 (d,  $J = 35.5$  Hz, 1H), 3.75 (t,  $J = 6.0$  Hz, 2H), 2.49-2.42 (m, 2H), 1.91-1.85 (m, 2H), 1.52 (brs, 1H).  $^{13}\text{C NMR}$  ( $\text{CDCl}_3$ , 125 MHz):  $\delta$  160.4 (d,  $J = 264.8$  Hz), 133.7, 128.4, 128.3 (d,  $J = 7.3$  Hz), 126.7 (d,  $J = 2.3$  Hz), 106.2 (d,  $J = 8.6$  Hz), 61.8, 29.5 (d,  $J = 26.9$  Hz), 29.3.  $^{19}\text{F NMR}$  ( $\text{CDCl}_3$ , 282 MHz):  $\delta$  -101.31 (dt,  $J = 39.5$  Hz, 18.6 Hz). **HRMS (EI)**: *m/z* calcd. for  $\text{C}_{11}\text{H}_{13}\text{OF}$   $[\text{M}]^+$ : 180.0950; found: 180.0950.

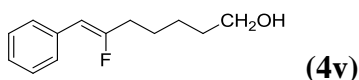

#### **(Z)-6-fluoro-7-phenylhept-6-en-1-ol**

The title compound was prepared according to the general procedure as described above in 56% yield. *Z/E* = >20:1.  $^1\text{H NMR}$  ( $\text{CDCl}_3$ , TMS, 500 MHz):  $\delta$  7.46 (d,  $J = 7.5$  Hz, 2H), 7.31 (t,  $J = 7.5$  Hz, 2H), 7.20 (t,  $J = 7.5$  Hz, 1H), 5.47 (d,  $J = 39.5$  Hz, 1H), 3.67 (t,  $J = 6.0$  Hz, 2H), 2.38-2.32 (m, 2H), 1.66-1.42 (m, 7H).  $^{13}\text{C NMR}$  ( $\text{CDCl}_3$ , 125 MHz):  $\delta$  160.9 (d,  $J = 265.0$  Hz), 133.8, 128.4, 128.2 (d,  $J = 7.4$  Hz), 126.6 (d,  $J = 2.0$  Hz), 105.9 (d,  $J = 8.6$  Hz), 62.8, 33.0 (d,  $J = 26.5$  Hz), 32.4, 26.2, 25.1.  $^{19}\text{F NMR}$  ( $\text{CDCl}_3$ , 282 MHz):  $\delta$  -101.03 (dt,  $J = 39.5$  Hz, 18.3 Hz). **HRMS (EI)**: *m/z* calcd. for  $\text{C}_{13}\text{H}_{17}\text{OF}$   $[\text{M}]^+$ : 208.1263; found: 208.1264.

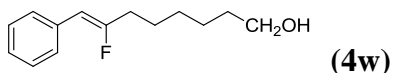

**(Z)-7-fluoro-8-phenyloct-7-en-1-ol**

The title compound was prepared according to the general procedure as described above in 45% yield. *Z/E* = >20:1.  $^1\text{H NMR}$  ( $\text{CDCl}_3$ , TMS, 500 MHz):  $\delta$  7.46 (d,  $J = 7.5$  Hz, 2H), 7.31 (t,  $J = 7.5$  Hz, 2H), 7.20 (t,  $J = 7.5$  Hz, 1H), 5.46 (d,  $J = 39.5$  Hz, 1H), 3.65 (t,  $J = 6.5$  Hz, 2H), 2.35-2.31 (m, 2H), 1.64-1.41 (m, 9H).  $^{13}\text{C NMR}$  ( $\text{CDCl}_3$ , 125 MHz):  $\delta$  161.1 (d,  $J = 265.0$  Hz), 133.9, 128.4, 128.2 (d,  $J = 7.3$  Hz), 126.6, 105.7 (d,  $J = 8.8$  Hz), 62.9, 33.0 (d,  $J = 26.4$  Hz), 32.6, 28.7, 26.3, 25.5.  $^{19}\text{F NMR}$  ( $\text{CDCl}_3$ , 282 MHz):  $\delta$  -100.86 (dt,  $J = 39.5$  Hz, 18.0 Hz). **HRMS (EI)**: *m/z* calcd. for  $\text{C}_{14}\text{H}_{19}\text{OF}$   $[\text{M}]^+$ : 222.1420; found: 222.1419.

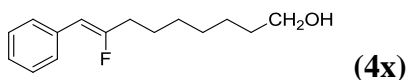

**(Z)-8-fluoro-9-phenylnon-8-en-1-ol**

The title compound was prepared according to the general procedure as described above in 42% yield. *Z/E* = >20:1.  $^1\text{H NMR}$  ( $\text{CDCl}_3$ , TMS, 500 MHz):  $\delta$  7.46 (d,  $J = 7.5$  Hz, 2H), 7.31 (t,  $J = 7.5$  Hz, 2H), 7.20 (t,  $J = 7.5$  Hz, 1H), 5.46 (d,  $J = 39.5$  Hz, 1H), 3.65 (t,  $J = 6.5$  Hz, 2H), 2.36-2.29 (m, 2H), 1.64-1.38 (m, 11H).  $^{13}\text{C NMR}$  ( $\text{CDCl}_3$ , 125 MHz):  $\delta$  161.1 (d,  $J = 265.1$  Hz), 133.9, 128.4, 128.2 (d,  $J = 7.3$  Hz), 126.6 (d,  $J = 2.3$  Hz), 105.7 (d,  $J = 8.8$  Hz), 63.0, 33.0 (d,  $J = 26.4$  Hz), 32.7, 29.1, 28.9, 26.3, 25.6.  $^{19}\text{F NMR}$  ( $\text{CDCl}_3$ , 282 MHz):  $\delta$  -100.77 (dt,  $J = 39.5$  Hz, 18.3 Hz). **HRMS (EI)**: *m/z* calcd. for  $\text{C}_{15}\text{H}_{21}\text{OF}$   $[\text{M}]^+$ : 236.1576; found: 236.1578.

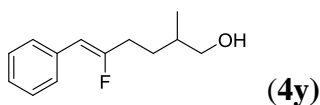

**(Z)-5-fluoro-2-methyl-6-phenylhex-5-en-1-ol**

The title compound was prepared according to the general procedure as described above in 66% yield. *Z/E* = >20:1.  $^1\text{H NMR}$  ( $\text{CDCl}_3$ , TMS, 500 MHz):  $\delta$  7.46 (d,  $J = 7.5$  Hz, 2H), 7.31 (t,  $J = 7.5$  Hz, 2H), 7.20 (t,  $J = 7.0$  Hz, 1H), 5.49 (d,  $J = 39.5$  Hz, 1H),

3.56-3.49 (m, 1H), 2.45-2.32 (m, 2H), 1.78-1.43 (m, 5H), 1.28 (d,  $J = 19.5$  Hz, 3H). **<sup>13</sup>C NMR** (CDCl<sub>3</sub>, 125 MHz):  $\delta$  161.0 (d,  $J = 266.6$  Hz), 133.8 (d,  $J = 2.4$  Hz), 128.4, 128.3 (d,  $J = 7.3$  Hz), 126.6 (d,  $J = 2.1$  Hz), 105.8 (d,  $J = 8.9$  Hz), 68.0, 35.1, 30.7 (d,  $J = 26.7$  Hz), 29.8, 16.4. **<sup>19</sup>F NMR** (CDCl<sub>3</sub>, 282 MHz):  $\delta$  -100.89 (dt,  $J = 39.5$  Hz, 18.1 Hz). **HRMS (EI)**:  $m/z$  calcd. for C<sub>12</sub>H<sub>15</sub>OF [M]<sup>+</sup>: 208.1263; found: 208.1265.

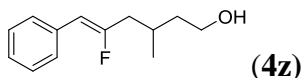

**(Z)-5-fluoro-3-methyl-6-phenylhex-5-en-1-ol**

The title compound was prepared according to the general procedure as described above in 66% yield.  $Z/E = >20:1$ . **<sup>1</sup>H NMR** (CDCl<sub>3</sub>, TMS, 500 MHz):  $\delta$  7.47 (d,  $J = 7.5$  Hz, 2H), 7.32 (t,  $J = 7.5$  Hz, 2H), 7.21 (t,  $J = 7.5$  Hz, 1H), 5.48 (d,  $J = 39.5$  Hz, 1H), 3.76-3.70 (m, 2H), 2.37-2.32 (m, 1H), 2.23-2.17 (m, 1H), 2.04-2.02 (m, 1H), 1.75-1.71 (m, 1H), 1.57 (brs, 1H), 1.49-1.45 (m, 1H), 1.02 (d,  $J = 6.5$  Hz, 2H). **<sup>13</sup>C NMR** (CDCl<sub>3</sub>, 125 MHz):  $\delta$  159.8 (d,  $J = 166.8$  Hz), 133.7, 128.4 (d,  $J = 16.7$  Hz), 128.2 (d,  $J = 7.4$  Hz), 126.7 (d,  $J = 1.8$  Hz), 107.3 (d,  $J = 9.1$  Hz), 60.9, 40.8 (d,  $J = 25.8$  Hz), 39.2, 27.6, 19.4. **<sup>19</sup>F NMR** (CDCl<sub>3</sub>, 282 MHz):  $\delta$  -100.09 (ddd,  $J = 40.7$  Hz, 22.2 Hz, 19.6 Hz). **HRMS (EI)**:  $m/z$  calcd. for C<sub>12</sub>H<sub>15</sub>OF [M]<sup>+</sup>: 208.1263; found: 208.1265 .

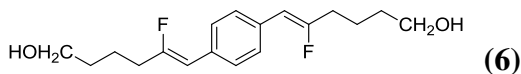

**(5Z,5'Z)-6,6'-(1,4-phenylene)bis(5-fluorohex-5-en-1-ol)**

The title compound was prepared according to the general procedure as described above in 46% yield.  $Z/E = >20:1$ . **<sup>1</sup>H NMR** (CDCl<sub>3</sub>, TMS, 500 MHz):  $\delta$  7.41 (s, 4H), 5.46 (d,  $J = 40.0$  Hz, 2H), 3.69 (t,  $J = 6.0$  Hz, 4H), 2.38-2.35 (m, 4H), 1.70-1.65 (m, 10H). **<sup>13</sup>C NMR** (CDCl<sub>3</sub>, 125 MHz):  $\delta$  160.7 (d,  $J = 265.1$  Hz), 132.2, 129.1, 128.3 (d,  $J = 7.5$  Hz), 126.4, 105.8 (d,  $J = 8.6$  Hz), 62.6, 32.8 (d,  $J = 26.6$  Hz), 31.9, 22.7. **<sup>19</sup>F NMR** (CDCl<sub>3</sub>, 282 MHz):  $\delta$  -100.75 (dt,  $J = 39.8$  Hz, 18.0 Hz). **HRMS (EI)**:  $m/z$  calcd. for C<sub>18</sub>H<sub>24</sub>O<sub>2</sub>F<sub>2</sub> [M]<sup>+</sup>: 310.1744; found: 310.1750.





## V. General Procedure for the Synthesis of Compounds 8

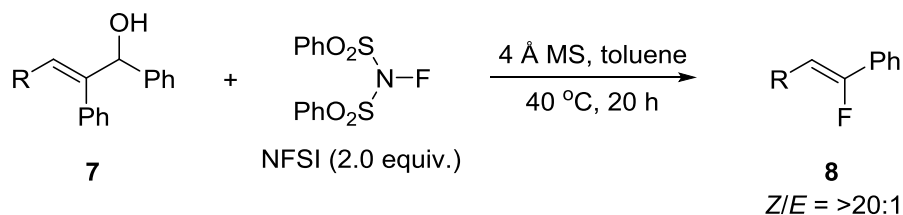

To a solution of allylic alcohol **7** (0.20 mmol) in 1 mL of toluene were added 4 Å MS and NFSI (0.40 mmol). The resulting mixture was allowed to stir at 40 °C for 20 h. The crude reaction mixture was filtered through celite and the filtrate was concentrated to dryness and then directly analyzed by <sup>1</sup>H NMR to determine the *Z/E* ratio. The residue was then purified by column chromatography (100% hexanes) to yield the product **8** in pure form.

## VI. Characterization of Compounds 8

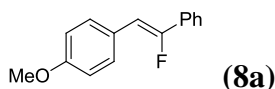

### (*Z*)-1-(2-fluoro-2-phenylvinyl)-4-methoxybenzene.<sup>2</sup>

The title compound was prepared according to the general procedure as described above in 70% yield. *Z/E* = >20:1. <sup>1</sup>H NMR (CDCl<sub>3</sub>, TMS, 300 MHz): δ 7.67-7.61 (m, 4H), 7.45-7.36 (m, 3H), 6.95 (d, *J* = 8.7 Hz, 2H), 6.30 (d, *J* = 39.9 Hz, 1H), 3.85 (s, 3H). <sup>13</sup>C NMR (CDCl<sub>3</sub>, 125 MHz): δ 158.8 (d, *J* = 2.9 Hz), 156.0 (d, *J* = 254.1 Hz), 133.1 (d, *J* = 27.8 Hz), 130.3 (d, *J* = 7.9 Hz), 128.6, 128.5 (d, *J* = 1.9 Hz), 126.4 (d, *J* = 2.9 Hz), 124.0 (d, *J* = 7.4 Hz), 114.0, 105.4 (d, *J* = 10.8 Hz), 55.2. <sup>19</sup>F NMR (CDCl<sub>3</sub>, 282 MHz): δ -117.08 (d, *J* = 39.8 Hz).

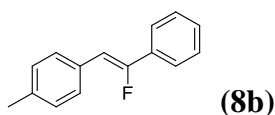

**(Z)-1-(2-fluoro-2-phenylvinyl)-4-methylbenzene.<sup>3</sup>**

The title compound was prepared according to the general procedure as described above in 33% yield. *Z/E* = >20:1. <sup>1</sup>H NMR (CDCl<sub>3</sub>, TMS, 300 MHz): δ 7.67 (d, *J* = 8.0 Hz, 2H), 7.58 (d, *J* = 8.0 Hz, 2H), 7.44 (d, *J* = 7.5 Hz, 2H), 7.39 (d, *J* = 7.2 Hz, 1H), 7.22 (d, *J* = 8.0 Hz, 2H), 6.33 (d, *J* = 39.5 Hz, 1H), 2.40 (s, 3H). <sup>13</sup>C NMR (CDCl<sub>3</sub>, 125 MHz): δ 156.7 (d, *J* = 255.8 Hz), 137.2, 133.1 (d, *J* = 11.6 Hz), 130.8 (d, *J* = 2.9 Hz), 129.3, 128.9, 128.8 (d, *J* = 8.5 Hz), 128.5 (d, *J* = 2.0 Hz), 124.2 (d, *J* = 7.4 Hz), 105.8 (d, *J* = 7.0 Hz), 21.3. <sup>19</sup>F NMR (CDCl<sub>3</sub>, 282 MHz): δ -115.17 (d, *J* = 39.8 Hz).

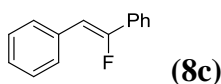

**(Z)-(1-fluoroethene-1,2-diyl)dibenzene.<sup>2</sup>**

The title compound was prepared according to the general procedure as described above in 28% yield. *Z/E* = >20:1. <sup>1</sup>H NMR (CDCl<sub>3</sub>, TMS, 500 MHz): δ 7.67-7.64 (m, 4H), 7.44-7.35 (m, 5H), 7.29-7.26 (m, 1H), 6.32 (d, *J* = 39.5 Hz, 1H). <sup>13</sup>C NMR (CDCl<sub>3</sub>, 125 MHz): δ 157.2 (d, *J* = 257.0 Hz), 133.7 (d, *J* = 3.1 Hz), 132.9 (d, *J* = 27.6 Hz), 129.0, 128.9 (d, *J* = 7.9 Hz), 128.59, 128.57, 127.3 (d, *J* = 2.5 Hz), 124.3 (d, *J* = 7.4 Hz), 105.7 (d, *J* = 10.5 Hz). <sup>19</sup>F NMR (CDCl<sub>3</sub>, 282 MHz): δ -114.14 (d, *J* = 39.5 Hz).

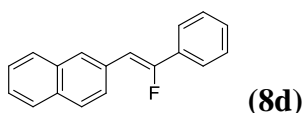

**(Z)-2-(2-fluoro-2-phenylvinyl)naphthalene.<sup>4</sup>**

The title compound was prepared according to the general procedure as described above in 33% yield. *Z/E* = >20:1. <sup>1</sup>H NMR (CDCl<sub>3</sub>, TMS, 500 MHz): δ 8.09 (s, 1H), 7.86-7.81 (m, 4H), 7.71 (d, *J* = 7.5 Hz, 2H), 7.49-7.39 (m, 5H), 5.49 (d, *J* = 39.5 Hz, 1H). <sup>13</sup>C NMR (CDCl<sub>3</sub>, 125 MHz): δ 157.5 (d, *J* = 257.4 Hz), 133.6, 132.9 (d, *J* = 27.8 Hz), 132.6, 131.3, 129.1, 128.6 (d, *J* = 2.0 Hz), 128.1, 128.1, 127.6, 126.8 (d, *J* = 8.1 Hz), 126.2, 126.1, 124.4, 124.3, 106.0 (d, *J* = 10.3 Hz). <sup>19</sup>F NMR (CDCl<sub>3</sub>, 282 MHz): δ -133.77 (d, *J* = 39.5 Hz).

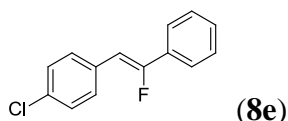

**(Z)-1-chloro-4-(2-fluoro-2-phenylvinyl)benzene.**<sup>3</sup>

The title compound was prepared according to the general procedure as described above in 16% yield. *Z/E* = >20:1. <sup>1</sup>H NMR (CDCl<sub>3</sub>, TMS, 500 MHz): δ 7.67 (d, *J* = 8.5 Hz, 2H), 7.59 (d, *J* = 8.5 Hz, 2H), 7.46-7.40 (m, 3H), 7.36 (d, *J* = 8.5 Hz, 2H), 6.29 (d, *J* = 39.0 Hz, 1H). <sup>13</sup>C NMR (CDCl<sub>3</sub>, 125 MHz): δ 157.6 (d, *J* = 257.6 Hz), 132.9 (d, *J* = 3.8 Hz), 132.6 (d, *J* = 27.6 Hz), 132.2 (d, *J* = 3.0 Hz), 130.1 (d, *J* = 8.3 Hz), 129.2, 128.8, 128.6 (d, *J* = 2.1 Hz), 124.4 (d, *J* = 7.5 Hz), 104.8 (d, *J* = 10.5 Hz). <sup>19</sup>F NMR (CDCl<sub>3</sub>, 282 MHz): δ -116.34 (d, *J* = 38.9 Hz).

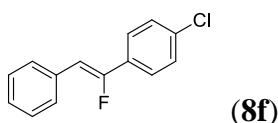

**(Z)-1-chloro-4-(1-fluoro-2-phenylvinyl)benzene.**<sup>5</sup>

The title compound was prepared according to the general procedure as described above in 14% yield. *Z/E* = >20:1. <sup>1</sup>H NMR (CDCl<sub>3</sub>, TMS, 500 MHz): δ 7.63 (d, *J* = 7.5 Hz, 2H), 7.58 (d, *J* = 9.0 Hz, 2H), 7.39-7.36 (m, 4H), 7.29-7.26 (m, 1H), 6.30 (d, *J* = 39.5 Hz, 1H). <sup>13</sup>C NMR (CDCl<sub>3</sub>, 125 MHz): δ 156.2 (d, *J* = 256.6 Hz), 134.9, 133.4 (d, *J* = 5.6 Hz), 131.4 (d, *J* = 28.4 Hz), 129.0 (d, *J* = 7.9 Hz), 128.9 (d, *J* = 2.0 Hz), 128.6, 127.6 (d, *J* = 2.4 Hz), 125.6 (d, *J* = 7.4 Hz), 106.4 (d, *J* = 10.4 Hz). <sup>19</sup>F NMR (CDCl<sub>3</sub>, 282 MHz): δ -114.49 (d, *J* = 39.2 Hz).

## VII. Synthesis and characterization of 10

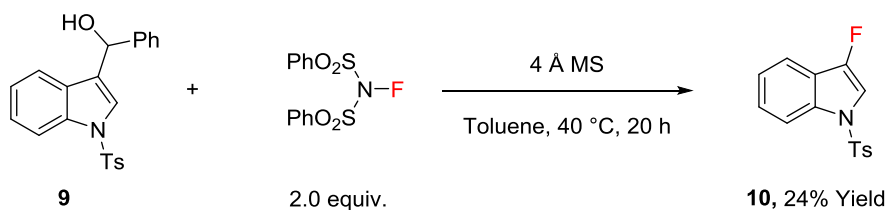

**3-fluoro-1-tosyl-1H-indole:** To a solution of allylic alcohol **9** (0.20 mmol) in 1 mL of toluene were added 4Å MS and NFSI (0.40 mmol). The resulting mixture was allowed to stir at 40 °C for 20 h. The crude reaction mixture was filtered through celite and the filtrate was concentrated to dryness. The residue was then purified by column chromatography (hexanes:ethyl acetate = 200:1) to yield the product **10** in 24% yield.

<sup>1</sup>H NMR (CDCl<sub>3</sub>, TMS, 500 MHz): δ 8.02 (d, *J* = 8.5 Hz, 1H), 7.73 (d, *J* = 8.0 Hz, 2H), 7.53 (d, *J* = 7.5 Hz, 1H), 7.37 (t, *J* = 7.5 Hz, 1H), 7.32 (d, *J* = 2.5 Hz, 1H), 7.29-7.26 (m, 1H), 7.22 (d, *J* = 8.0 Hz, 2H), 2.34 (s, 3H). <sup>13</sup>C NMR (CDCl<sub>3</sub>, 125 MHz): δ 148.9 (d, *J* = 253.9 Hz), 145.1, 134.8, 132.8 (d, *J* = 5.1 Hz), 129.9, 126.8, 126.0, 123.6, 121.6 (d, *J* = 18.9 Hz), 117.7 (d, *J* = 2.5 Hz), 114.1 (d, *J* = 1.1 Hz), 108.8 (d, *J* = 28.5 Hz), 21.5. <sup>19</sup>F NMR (CDCl<sub>3</sub>, 282 MHz): δ -165.6 (d, *J* = 2.5 Hz). HRMS (EI): *m/z* calcd. for C<sub>15</sub>H<sub>12</sub>FNO<sub>2</sub>S [M]<sup>+</sup>: 289.0573; found: 289.0571.

## VIII. General Procedure for the Synthesis of Compounds **13** and **14**

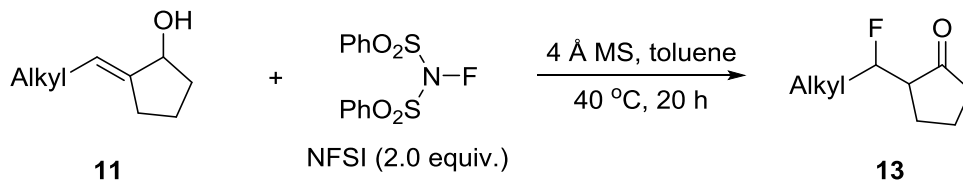

To a solution of allylic alcohol **11** (0.20 mmol) in 1 mL of toluene were added 4Å MS and NFSI (0.40 mmol). The resulting mixture was allowed to stir at 40 °C for 20 h. The crude reaction mixture was filtered through celite and the filtrate was concentrated to dryness and then directly analyzed by <sup>1</sup>H NMR to determine the *Z/E* ratio. The residue was then purified by column chromatography to yield the product **13** in pure form.

## IX. Characterization of Compounds **13**

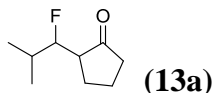

### 2-(1-fluoro-2-methylpropyl)cyclopentan-1-one.

The title compound was prepared according to the general procedure as described above in 42% yield. *Trans:cis* = 2:1.  $^1\text{H NMR}$  ( $\text{CDCl}_3$ , TMS, 400 MHz):  $\delta$  4.54 (ddd,  $J$  = 2.4 Hz, 6.8 Hz, 46.8 Hz, 1H), 2.36-1.74 (m, 7H), 1.03-0.87 (m, 6H).  $^{13}\text{C NMR}$  ( $\text{CDCl}_3$ , 125 MHz):  $\delta$  218.5, 96.7 (d,  $J$  = 172.0 Hz), 50.6 (d,  $J$  = 2.3 Hz), 38.7, 30.9 (d,  $J$  = 19.8 Hz), 22.8 (d,  $J$  = 4.0 Hz), 20.8, 18.4 (d,  $J$  = 20.6 Hz), 18.3 (d,  $J$  = 23.6 Hz).  $^{19}\text{F NMR}$  ( $\text{CDCl}_3$ , 282 MHz):  $\delta$  -192.3 (ddd,  $J$  = 12.0 Hz, 35.6 Hz, 47.0 Hz).

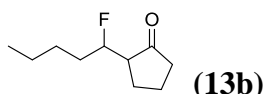

### 2-(1-fluoropentyl)cyclopentan-1-one.

The title compound was prepared according to the general procedure as described above in 60% yield. *Trans:cis* = 3.3:1.  $^1\text{H NMR}$  ( $\text{CDCl}_3$ , TMS, 400 MHz):  $\delta$  4.93-4.81 (m, 1H), 2.31-2.27 (m, 1H), 2.16-1.90 (m, 4H), 1.76-1.68 (m, 2H), 1.58-1.47 (m, 1H), 1.43-1.23 (m, 5H), 0.89-0.86 (m, 3H).  $^{13}\text{C NMR}$  ( $\text{CDCl}_3$ , 125 MHz):  $\delta$  218.1, 91.9 (d,  $J$  = 169.4 Hz), 52.6 (d,  $J$  = 22.8 Hz), 38.7, 33.1 (d,  $J$  = 20.5 Hz), 27.3 (d,  $J$  = 5.0 Hz), 23.0 (d,  $J$  = 3.8 Hz), 22.4, 20.7, 13.9.  $^{19}\text{F NMR}$  ( $\text{CDCl}_3$ , 282 MHz):  $\delta$  -189.4 - -189.7 (m).

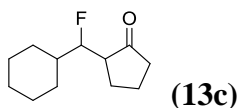

### 2-(cyclohexylfluoromethyl)cyclopentan-1-one.

The title compound was prepared according to the general procedure as described above in 73% yield. *Trans:cis* = 2:1.  $^1\text{H NMR}$  ( $\text{CDCl}_3$ , TMS, 500 MHz):  $\delta$  4.60 (ddd,  $J$  = 2.5 Hz, 9.0 Hz, 47.5 Hz, 1H), 2.34-2.28 (m, 2H), 2.16-1.95 (m, 5H), 1.78-1.50 (m, 5H), 1.28-1.14 (m, 4H), 1.04-0.95 (m, 2H).  $^{13}\text{C NMR}$  ( $\text{CDCl}_3$ , 125 MHz):  $\delta$  218.9, 95.8 (d,  $J$  = 170.9 Hz), 50.3 (d,  $J$  = 23.6 Hz), 40.2 (d,  $J$  = 19.3 Hz), 38.8, 28.8 (d,  $J$  = 4.9 Hz), 28.3 (d,  $J$  = 7.6 Hz), 26.1, 25.8, 25.4, 22.7 (d,  $J$  = 3.8 Hz), 20.8.  $^{19}\text{F NMR}$  ( $\text{CDCl}_3$ , 282 MHz):  $\delta$  -194.3 (ddd,  $J$  = 11.6 Hz, 36.1 Hz, 47.4 Hz).

## X. Characterization of Compounds 14

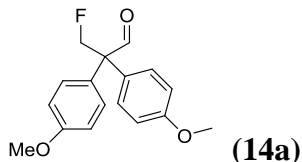

### 3-fluoro-2,2-bis(4-methoxyphenyl)propanal.

The title compound was prepared according to the general procedure as described above in 86% yield.  $^1\text{H NMR}$  ( $\text{CDCl}_3$ , TMS, 500 MHz):  $\delta$  9.85 (d,  $J = 2.5$  Hz, 1H), 7.14 (d,  $J = 9.0$  Hz, 4H), 6.93 (d,  $J = 9.0$  Hz, 4H), 5.10 (d,  $J = 47.0$  Hz, 2H), 3.82 (s, 6H).  $^{13}\text{C NMR}$  ( $\text{CDCl}_3$ , 100 MHz):  $\delta$  197.5 (d,  $J = 3.4$  Hz), 159.2, 130.0 (d,  $J = 1.4$  Hz), 129.0 (d,  $J = 2.8$  Hz), 84.3 (d,  $J = 177.2$  Hz), 62.8 (d,  $J = 17.9$  Hz), 55.3.  $^{19}\text{F NMR}$  ( $\text{CDCl}_3$ , 282 MHz):  $\delta$  -126.8 (dd,  $J = 3.8$  Hz, 54.5 Hz). **HRMS (APCI)**:  $m/z$  calcd. for  $\text{C}_{17}\text{H}_{18}\text{FO}_3$   $[\text{M}+\text{H}]^+$ : 289.1234; found: 289.1227.

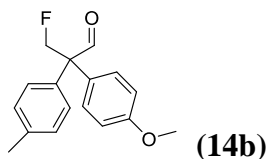

### 3-fluoro-2-(4-methoxyphenyl)-2-(p-tolyl)propanal.

The title compound was prepared according to the general procedure as described above in 82% yield.  $^1\text{H NMR}$  ( $\text{CDCl}_3$ , TMS, 500 MHz):  $\delta$  9.86 (d,  $J = 2.5$  Hz, 1H), 7.21 (d,  $J = 8.0$  Hz, 2H), 7.14-7.09 (m, 4H), 6.92 (d,  $J = 8.0$  Hz, 2H), 5.10 (d,  $J = 47.0$  Hz, 2H), 3.82 (s, 3H), 2.36 (s, 3H).  $^{13}\text{C NMR}$  ( $\text{CDCl}_3$ , 100 MHz):  $\delta$  197.5 (d,  $J = 3.4$  Hz), 159.2, 137.8, 134.1 (d,  $J = 3.8$  Hz), 130.0, 129.7, 128.7, 114.3, 84.4 (d,  $J = 177.3$  Hz), 63.2 (d,  $J = 17.6$  Hz), 55.3, 21.0.  $^{19}\text{F NMR}$  ( $\text{CDCl}_3$ , 282 MHz):  $\delta$  -126.8 (dd,  $J = 1.9$  Hz, 54.5 Hz). **HRMS (APCI)**:  $m/z$  calcd. for  $\text{C}_{17}\text{H}_{18}\text{FO}_2$   $[\text{M}+\text{H}]^+$ : 273.1285; found: 273.1281.

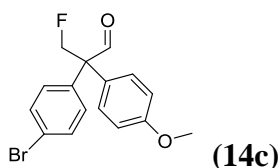

### 2-(4-bromophenyl)-3-fluoro-2-(4-methoxyphenyl)propanal.

The title compound was prepared according to the general procedure as described above in 81% yield.  $^1\text{H NMR}$  ( $\text{CDCl}_3$ , TMS, 400 MHz):  $\delta$  9.84 (d,  $J = 2.4$  Hz, 1H), 7.52 (d,  $J = 8.4$  Hz, 2H), 7.11-7.07 (m, 4H), 6.93 (d,  $J = 8.8$  Hz, 2H), 5.20-5.00 (m, 2H), 3.82 (s, 3H).  $^{13}\text{C NMR}$  ( $\text{CDCl}_3$ , 100 MHz):  $\delta$  196.8 (d,  $J = 3.7$  Hz), 159.5, 136.6 (d,  $J = 2.1$  Hz), 132.1, 130.6 (d,  $J = 1.5$  Hz), 129.8 (d,  $J = 1.2$  Hz), 122.3, 114.6, 84.1 (d,  $J = 177.8$  Hz), 63.2 (d,  $J = 17.9$  Hz), 55.3.  $^{19}\text{F NMR}$  ( $\text{CDCl}_3$ , 282 MHz):  $\delta$  -125.1- -127.9 (m). **HRMS (APCI)**:  $m/z$  calcd. for  $\text{C}_{16}\text{H}_{15}\text{BrFO}_2$   $[\text{M}+\text{H}]^+$ : 337.0234; found: 337.0231.

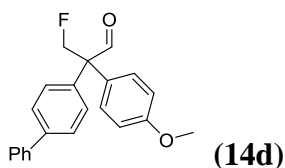

### 2-([1,1'-biphenyl]-4-yl)-3-fluoro-2-(4-methoxyphenyl)propanal.

The title compound was prepared according to the general procedure as described above in 76% yield.  $^1\text{H NMR}$  ( $\text{CDCl}_3$ , TMS, 400 MHz):  $\delta$  9.93 (d,  $J = 2.8$  Hz, 1H), 7.64-7.59 (m, 4H), 7.46 (t,  $J = 7.2$  Hz, 2H), 7.31 (d,  $J = 8.0$  Hz, 2H), 7.18 (d,  $J = 8.8$  Hz, 2H), 6.96 (d,  $J = 8.8$  Hz, 2H), 5.18 (dd,  $J = 2.8$  Hz, 47.2 Hz, 2H), 3.83 (s, 3H).  $^{13}\text{C NMR}$  ( $\text{CDCl}_3$ , 125 MHz):  $\delta$  197.4 (d,  $J = 3.5$  Hz), 159.3, 140.9, 140.2, 136.2 (d,  $J = 2.5$  Hz), 130.1, 129.3, 128.8, 127.6, 127.1, 114.5, 84.3 (d,  $J = 177.5$  Hz), 63.3 (d,  $J = 17.9$  Hz), 55.3.  $^{19}\text{F NMR}$  ( $\text{CDCl}_3$ , 282 MHz):  $\delta$  -125.7- -127.5 (m). **HRMS (APCI)**:  $m/z$  calcd. for  $\text{C}_{22}\text{H}_{20}\text{FO}_2$   $[\text{M}+\text{H}]^+$ : 335.1442; found: 335.1446.

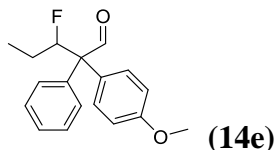

### 3-fluoro-2-(4-methoxyphenyl)-2-phenylpentanal.

The title compound was prepared according to the general procedure as described above in 75% yield.  $^1\text{H NMR}$  ( $\text{CDCl}_3$ , TMS, 400 MHz):  $\delta$  9.73 (d,  $J = 5.2$  Hz, 1H), 7.39-7.36 (m, 3H), 7.20-7.16 (m, 4H), 6.91 (d,  $J = 7.2$  Hz, 2H), 5.60 (ddd,  $J = 1.2$  Hz, 9.6 Hz, 47.2 Hz, 1H), 3.81 (s, 3H), 1.70-1.63 (m, 1H), 1.13-1.03 (m, 4H).  $^{13}\text{C NMR}$  ( $\text{CDCl}_3$ , 100 MHz):  $\delta$  196.1 (d,  $J = 6.2$  Hz), 159.1, 137.3 (d,  $J = 1.8$  Hz), 131.2 (d,  $J = 1.1$  Hz),



129.6 (d,  $J = 1.4$  Hz), 128.6, 127.9, 114.0, 94.5 (d,  $J = 176.4$  Hz), 67.0 (d,  $J = 19.0$  Hz), 55.2, 24.9 (d,  $J = 21.4$  Hz), 10.4 (d,  $J = 2.9$  Hz).  $^{19}\text{F}$  NMR (CDCl<sub>3</sub>, 282 MHz):  $\delta$  -194.3 (t,  $J = 49.3$  Hz). HRMS (APCI):  $m/z$  calcd. for C<sub>18</sub>H<sub>18</sub>FO<sub>2</sub> [M+H]<sup>+</sup>: 285.1296; found: 285.1298.

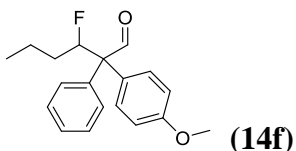

### 3-fluoro-2-(4-methoxyphenyl)-2-phenylhexanal.

The title compound was prepared according to the general procedure as described above in 73% yield.  $^1\text{H}$  NMR (CDCl<sub>3</sub>, TMS, 400 MHz):  $\delta$  9.73 (d,  $J = 5.2$  Hz, 1H), 7.39-7.36 (m, 3H), 7.20-7.16 (m, 4H), 6.91 (d,  $J = 7.2$  Hz, 2H), 5.60 (ddd,  $J = 1.2$  Hz, 9.6 Hz, 47.2 Hz, 1H), 3.81 (s, 3H).  $^{13}\text{C}$  NMR (CDCl<sub>3</sub>, 100 MHz):  $\delta$  196.1 (d,  $J = 6.2$  Hz), 159.1, 137.3 (d,  $J = 1.9$  Hz), 131.3 (d,  $J = 1.3$  Hz), 129.7 (d,  $J = 1.4$  Hz), 128.7, 128.3 (d,  $J = 2.2$  Hz), 127.9, 114.1, 92.8 (d,  $J = 175.6$  Hz), 66.9 (d,  $J = 19.1$  Hz), 55.3, 33.7 (d,  $J = 21.1$  Hz), 19.2 (d,  $J = 2.1$  Hz), 13.8.  $^{19}\text{F}$  NMR (CDCl<sub>3</sub>, 282 MHz):  $\delta$  -194.3 (t,  $J = 50.4$  Hz).

## XI. Mechanistic studies

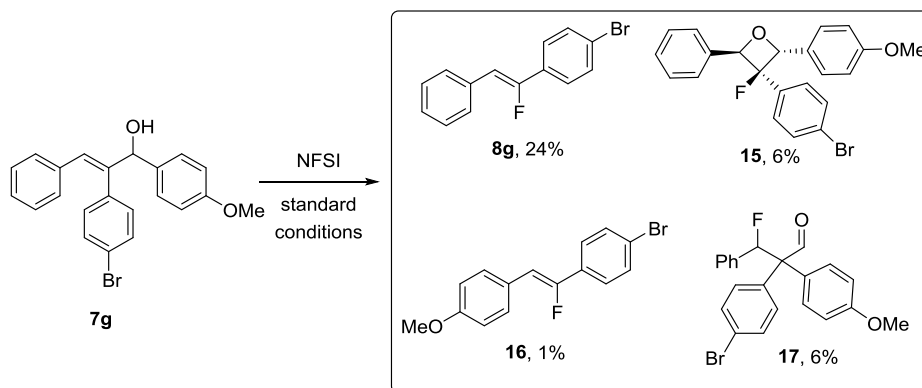

To a solution of allylic alcohol **7g** (0.50 mmol) in 3 mL of toluene were added 4Å MS and NFSI (1.00 mmol). The resulting mixture was allowed to stir at 40 °C for 20 h. The crude reaction mixture was filtered through celite and the filtrate was concentrated to dryness and then directly analyzed by <sup>1</sup>H NMR to determine the ratio of major product and the byproduct. The residue was then purified by column chromatography to yield the product **8g**, **15** and **17** in pure form.

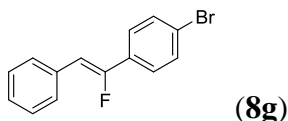

### **(Z)-1-bromo-4-(1-fluoro-2-phenylvinyl)benzene.<sup>3</sup>**

The title compound was prepared according to the general procedure as described above in 24% yield. *Z/E* = >20:1. <sup>1</sup>H NMR (CDCl<sub>3</sub>, TMS, 400 MHz): δ 7.55 (d, *J* = 6.8 Hz, 2H), 7.47-7.41 (m, 4H), 7.30 (d, *J* = 6.8 Hz, 2H), 6.22 (d, *J* = 39.2 Hz, 1H). <sup>13</sup>C NMR (CDCl<sub>3</sub>, 100 MHz): δ 156.2 (d, *J* = 256.6 Hz), 133.3 (d, *J* = 3.1 Hz), 131.8 (d, *J* = 28.3 Hz), 131.8 (d, *J* = 2.2 Hz), 129.0 (d, *J* = 7.9 Hz), 128.6, 127.6 (d, *J* = 2.6 Hz), 125.8 (d, *J* = 7.4 Hz), 123.1, 106.5 (d, *J* = 10.3 Hz). <sup>19</sup>F NMR (CDCl<sub>3</sub>, 376 MHz): δ -114.6 (d, *J* = 39.5 Hz).

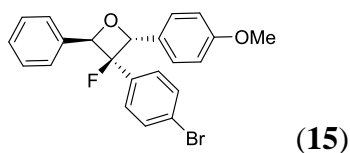

### 3-(4-bromophenyl)-3-fluoro-2-(4-methoxyphenyl)-4-phenyloxetane.

The title compound was prepared according to the general procedure as described above in 6% yield.  $^1\text{H NMR}$  ( $\text{CDCl}_3$ , TMS, 500 MHz):  $\delta$  7.50-7.49 (m, 4H), 7.40-7.39 (m, 1H), 7.36 (d,  $J = 9.0$  Hz, 2H), 7.15 (d,  $J = 8.5$  Hz, 2H), 7.11 (d,  $J = 8.5$  Hz, 2H), 6.79 (d,  $J = 8.5$  Hz, 2H), 6.15 (d,  $J = 21.5$  Hz, 1H), 6.09 (d,  $J = 15.0$  Hz, 1H), 3.77 (s, 3H).  $^{13}\text{C NMR}$  ( $\text{CDCl}_3$ , 125 MHz):  $\delta$  159.3, 135.5 (d,  $J = 5.0$  Hz), 134.6 (d,  $J = 24.4$  Hz), 131.2, 128.5 (d,  $J = 12.5$  Hz), 128.3 (d,  $J = 6.5$  Hz), 127.2 (d,  $J = 9.5$  Hz), 126.8, 126.3, 122.6 (d,  $J = 1.9$  Hz), 113.8, 98.4 (d,  $J = 214.0$  Hz), 90.6 (d,  $J = 30.3$  Hz), 88.6 (d,  $J = 21.6$  Hz), 55.2.  $^{19}\text{F NMR}$  ( $\text{CDCl}_3$ , 376 MHz):  $\delta$  -151.8 (dd,  $J = 15.0$  Hz, 21.4 Hz). **HRMS (APCI):**  $m/z$  Calcd. for  $[\text{C}_{22}\text{H}_{18}\text{BrFO}_2, \text{M}+\text{H}]^+$ : 412.0469; Found: 412.0466.

The configuration of **15** was determined by 2D ( $^1\text{H}$ - $^1\text{H}$  Cosy, NOESY and  $^1\text{H}$ - $^{13}\text{C}$  HMQC, HMBC) NMR measurement as shown below (Figure S2).

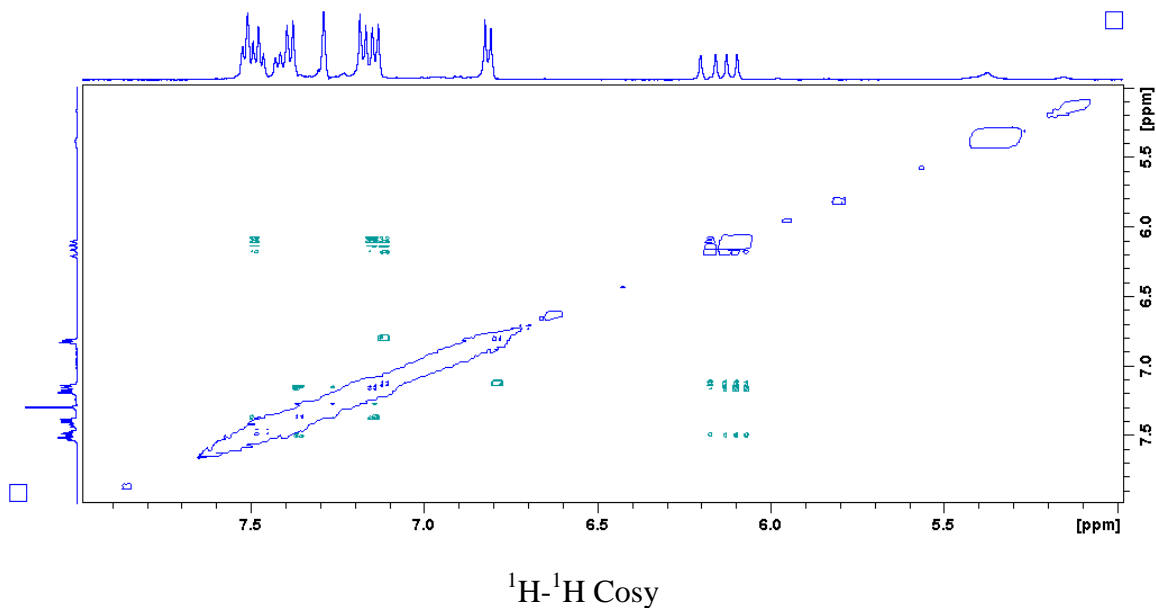

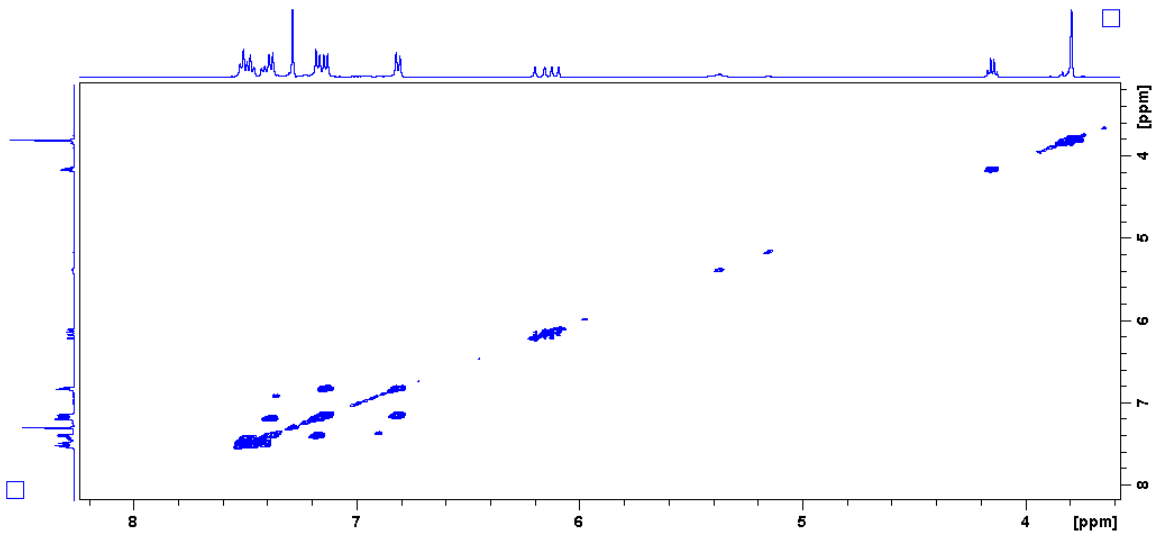

$^1\text{H}$ - $^1\text{H}$  NOESY

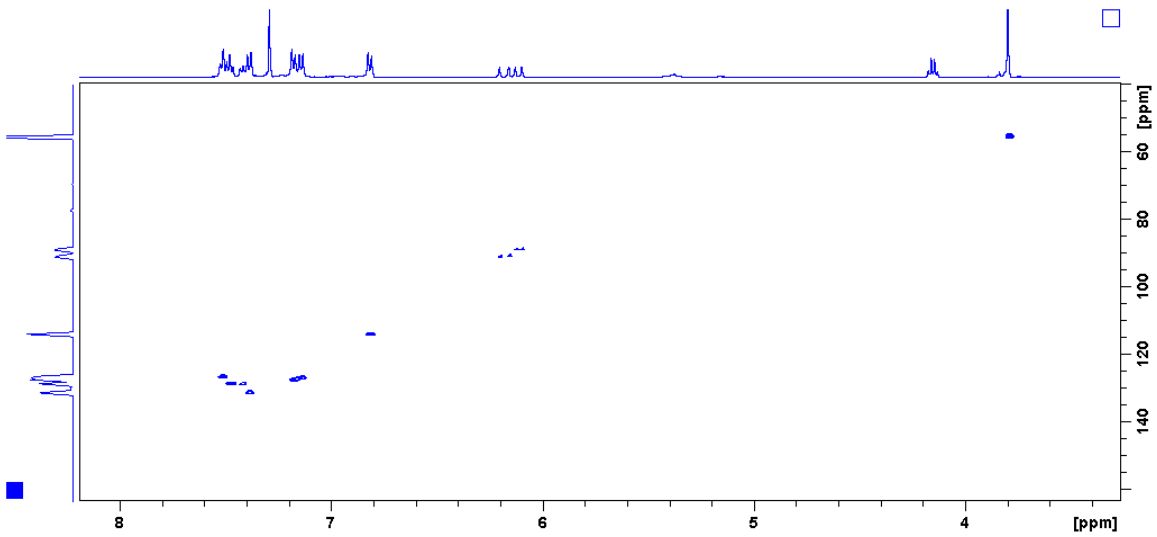

$^1\text{H}$ - $^{13}\text{C}$  HMQC

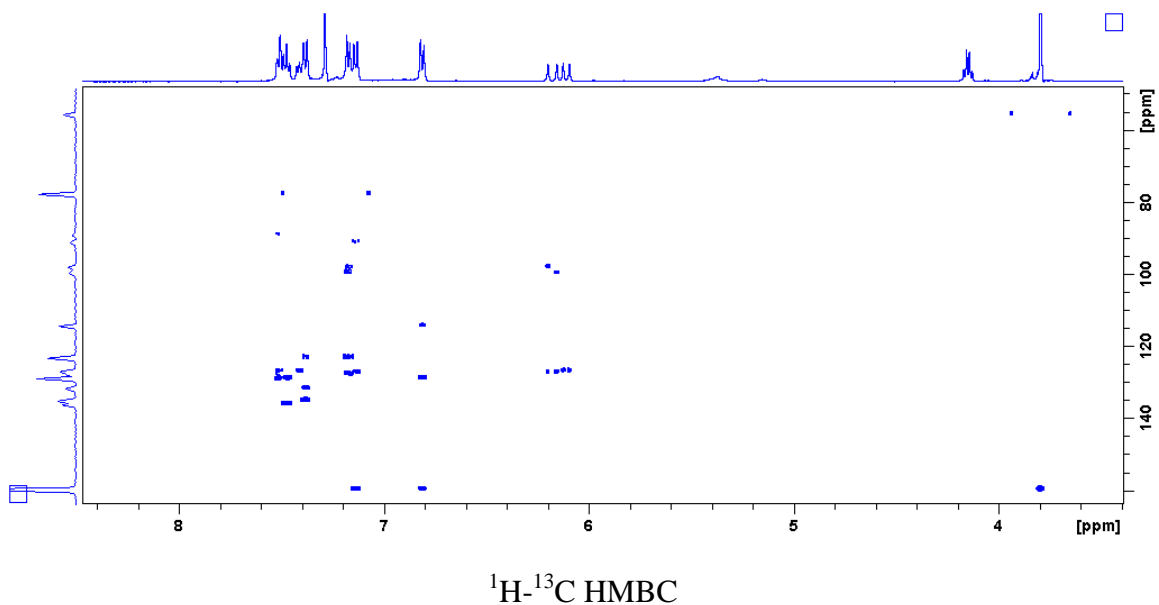

**Figure S2.** 2D ( $^1\text{H}$ - $^1\text{H}$  and  $^1\text{H}$ - $^{13}\text{C}$ ) NMR spectra of **15**.

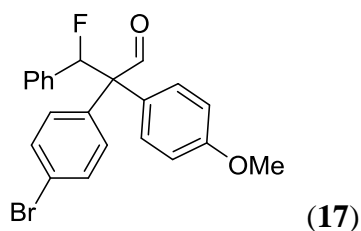

**2-(4-bromophenyl)-3-fluoro-2-(4-methoxyphenyl)-3-phenylpropanal.**

The title compound was prepared according to the general procedure as described above in 6% yield.  $^1\text{H}$  NMR ( $\text{CDCl}_3$ , TMS, 500 MHz):  $\delta$  9.75 (d,  $J = 5.5$  Hz, 1H), 7.48 (d,  $J = 9.0$  Hz, 2H), 7.22 (t,  $J = 7.0$  Hz, 2H), 7.15-7.12 (m, 4H), 6.93 (d,  $J = 8.5$  Hz, 2H), 6.85-6.83 (m, 4H), 6.75 (d,  $J = 44.0$  Hz, 1H), 3.82 (s, 3H).  $^{13}\text{C}$  NMR ( $\text{CDCl}_3$ , 100 MHz):  $\delta$  195.3 (d,  $J = 7.6$  Hz), 159.4, 135.9 (d,  $J = 26.3$  Hz), 132.0, 131.6 (d,  $J = 4.6$  Hz), 128.5, 127.7 (d,  $J = 8.0$  Hz), 127.5, 122.2, 113.8, 93.0 (d,  $J = 224.6$  Hz), 68.6 (d,  $J = 27.8$  Hz), 55.32.  $^{19}\text{F}$  NMR ( $\text{CDCl}_3$ , 376 MHz):  $\delta$  -186.1 (dd,  $J = 44.0$  Hz). HRMS (APCI):  $m/z$  Calcd. for  $[\text{C}_{22}\text{H}_{18}\text{BrFO}_2, \text{M}+\text{H}]^+$ : 412.0469; Found: 412.0465.

## XII. Synthesis and characterization of 18-23

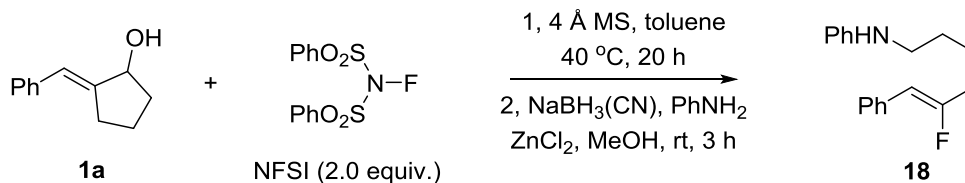

**(Z)-N-(5-fluoro-6-phenylhex-5-en-1-yl)aniline (18):** To a solution of allylic alcohol **1a** (34.8 mg, 0.200 mmol) in 1 mL of toluene were added 4 Å MS and NFSI (126 mg, 0.400 mmol). The resulting mixture was allowed to stir at 40 °C for ~20 h. Once the starting material was completely consumed (monitored by TLC), the mixture was filtered through celite and the filtrate was concentrated to dryness. 1 mL of methanol and PhNH<sub>2</sub> (74.4 mg, 0.800 mmol) were then added sequentially. To the above mixture at room temperature were added a solution of sodium cyanoborohydride (12.6 mg, 0.200 mmol) and zinc chloride (13.4 mg, 0.100 mmol) in methanol (0.5 mL). The resulting solution was stirred at room temperature for 2 h and was taken up in 0.1 N NaOH (2 mL). After methanol was evaporated under reduced pressure, the aqueous solution was extracted with ethyl acetate (3 x 10 mL). The combined organic layer was washed with water and brine, dried over anhydrous MgSO<sub>4</sub> and evaporated to dryness. The residue was purified by column chromatography (hexanes:ethyl acetate = 5:1) to produce compound **18** in 56% yield as an oil.

<sup>1</sup>H NMR (CDCl<sub>3</sub>, TMS, 300 MHz): δ 7.48 (d, *J* = 7.5 Hz, 2H), 7.33 (t, *J* = 7.2 Hz, 2H), 7.25-7.17 (m, 3H), 6.74-6.61 (m, 3H), 5.50 (d, *J* = 39.3 Hz, 1H), 3.20-3.13 (m, 2H), 2.85 (s, 1H), 2.43-2.35 (m, 2H), 1.76-1.72 (m, 4H). <sup>13</sup>C NMR (CDCl<sub>3</sub>, 125 MHz): δ 160.5 (d, *J* = 265.0 Hz), 148.3, 133.7, 129.2, 128.4, 128.3 (d, *J* = 7.3 Hz), 126.7, 117.3, 112.7, 106.1 (d, *J* = 8.8 Hz), 43.6, 32.8 (d, *J* = 26.6 Hz), 28.8, 23.9. <sup>19</sup>F NMR (CDCl<sub>3</sub>, 282 MHz): δ -101.32 (dt, *J* = 39.5 Hz, 18.0 Hz). HRMS (EI): *m/z* calcd. for C<sub>18</sub>H<sub>20</sub>NF [M]<sup>+</sup>: 269.1580; found: 269.1576.

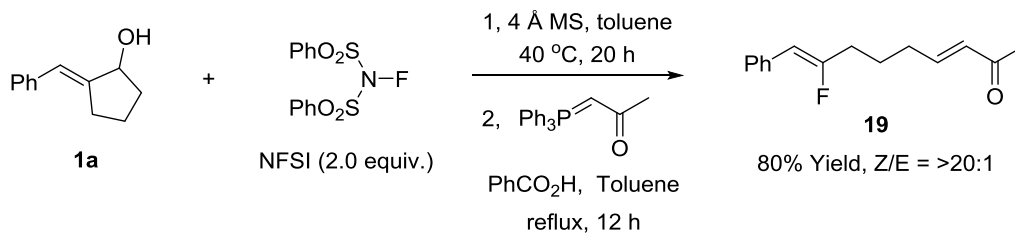

**(3E,8Z)-8-fluoro-9-phenylnona-3,8-dien-2-one (19):** To a solution of allylic alcohol **1a** (34.8 mg, 0.200 mmol) in 1 mL of toluene were added 4 Å MS and NFSI (126 mg, 0.400 mmol). The resulting mixture was allowed to stir at 40 °C for ~20 h. Once the starting material was completely consumed (monitored by TLC), the mixture was filtered through celite and the filtrate was concentrated to dryness. 1 mL of toluene was then added, which was followed by the addition of PhCO<sub>2</sub>H (4.9 mg, 0.040 mmol) and 1-(triphenylphosphoranylidene)propan-2-one (95 mg, 0.300 mmol). The resulting solution was heated to reflux for 12 h and then cooled to room temperature. After toluene was evaporated under reduced pressure, the residue was purified by column chromatography (hexanes:ethyl acetate = 20:1) to give compound **19** in 80% yield as an oil.

**<sup>1</sup>H NMR** (CDCl<sub>3</sub>, TMS, 300 MHz): δ 7.46 (d, *J* = 7.5 Hz, 2H), 7.32 (t, *J* = 7.5 Hz, 2H), 7.21 (t, *J* = 7.5 Hz, 1H), 6.80 (dt, *J* = 7.0 Hz, 16.0 Hz, 1H), 6.14-6.10 (m, 1H), 5.49 (d, *J* = 39.5 Hz, 1H), 2.41-2.31 (m, 4H), 2.25 (s, 3H), 1.83-1.77 (m, 2H). **<sup>13</sup>C NMR** (CDCl<sub>3</sub>, 125 MHz): δ 198.4, 159.9 (d, *J* = 264.9 Hz), 147.0, 133.5, 131.8, 131.6, 128.4, 128.3 (d, *J* = 7.1 Hz), 126.8 (d, *J* = 2.1 Hz), 106.6 (d, *J* = 8.6 Hz), 32.5 (d, *J* = 26.8 Hz), 31.4, 27.0, 24.8. **<sup>19</sup>F NMR** (CDCl<sub>3</sub>, 282 MHz): δ -101.83 (dt, *J* = 39.2 Hz, 18.3 Hz). **HRMS (EI):** *m/z* calcd. for C<sub>15</sub>H<sub>17</sub>FO [M]<sup>+</sup>: 232.1263; found: 232.1269.

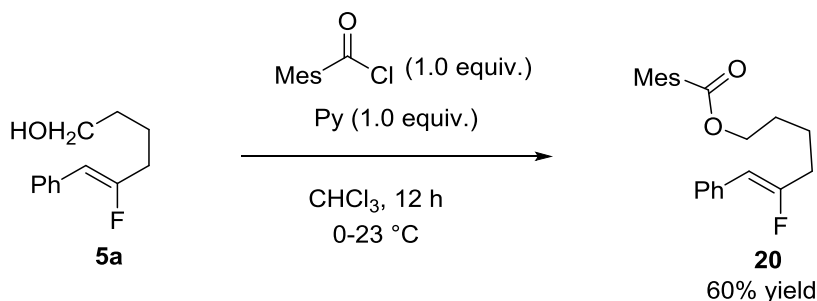

**(Z)-5-fluoro-6-phenylhex-5-en-1-yl 2,4,6-trimethylbenzoate (20):** To a solution of **5a** (38.8 mg, 0.200 mmol) in 1 mL CHCl<sub>3</sub> was added dropwise a solution of pyridine (15.8 mg, 0.200 mmol) and 2,4,6-trimethylbenzoyl chloride (36.4 mg, 0.200 mmol) in 1 mL CHCl<sub>3</sub> at 0 °C. The mixture was allowed to stir at room temperature for 12 h and then diluted with ether and a solution of aqueous sodium chloride. The aqueous phase was extracted with diethyl ether for three times. The combined organic phase was dried over anhydrous MgSO<sub>4</sub>, and evaporated to dryness. The residue was purified by column chromatography (hexanes:ethyl acetate = 20:1) to give the corresponding ester **20** in 60% yield.

**<sup>1</sup>H NMR** (CDCl<sub>3</sub>, TMS, 500 MHz): δ 7.51 (d, *J* = 7.5 Hz, 2H), 7.35 (t, *J* = 7.5 Hz, 2H), 7.25 (t, *J* = 7.5 Hz, 1H), 6.90 (s, 2H), 5.52 (d, *J* = 39.5 Hz, 1H), 4.40 (t, *J* = 6.0 Hz, 2H), 2.46-2.32 (m, 11H), 1.90-1.78 (m, 4H). **<sup>13</sup>C NMR** (CDCl<sub>3</sub>, 125 MHz): δ 170.1, 160.2 (d, *J* = 265.0 Hz), 139.2, 134.9, 133.6 (d, *J* = 2.3 Hz), 131.0, 128.3, 128.2 (d, *J* = 7.4 Hz), 126.7, 106.2 (d, *J* = 8.6 Hz), 64.3, 32.5 (d, *J* = 26.8 Hz), 27.8, 23.0, 21.0, 19.7. **<sup>19</sup>F NMR** (CDCl<sub>3</sub>, 282 MHz): δ -101.44 (dt, *J* = 39.2 Hz, 18.3 Hz). **HRMS (EI):** *m/z* calcd. for C<sub>22</sub>H<sub>25</sub>O<sub>2</sub>F [M]<sup>+</sup>: 340.1839; found: 340.1844.

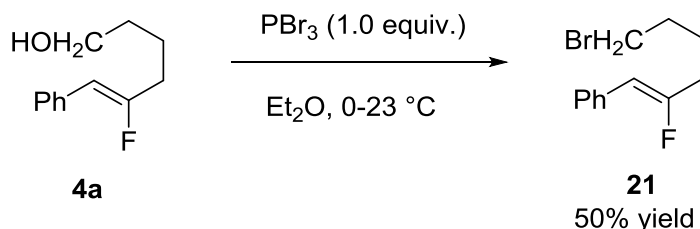

**(Z)-(6-bromo-2-fluorohex-1-en-1-yl)benzene (21):** To a solution of **4a** (38.8 mg, 0.200 mmol) in 1 mL Et<sub>2</sub>O was added PBr<sub>3</sub> (53.5 mg, 0.200 mmol) at 0 °C. The mixture was allowed to warm to ambient temperature and stir overnight. The reaction mixture was quenched with NaHCO<sub>3</sub> (saturated aqueous solution) and extracted with Et<sub>2</sub>O. The combined organic layer was washed with brine, dried over MgSO<sub>4</sub> and concentrated. The residue was purified by column chromatography (hexanes:ethyl acetate = 20:1) to give the corresponding product **21** in 50% yield.



**<sup>1</sup>H NMR** (CDCl<sub>3</sub>, TMS, 500 MHz): δ 7.46 (d, *J* = 7.5 Hz, 2H), 7.32 (t, *J* = 7.5 Hz, 2H), 7.21 (t, *J* = 7.5 Hz, 1H), 5.49 (d, *J* = 39.5 Hz, 1H), 3.45 (t, *J* = 6.5 Hz, 2H), 2.41-2.34 (m, 2H), 1.99-1.93 (m, 2H), 1.81-1.75 (m, 2H). **<sup>13</sup>C NMR** (CDCl<sub>3</sub>, 125 MHz): δ 160.1 (d, *J* = 264.9 Hz), 133.6, 128.4, 128.3 (d, *J* = 7.3 Hz), 126.8, 106.3 (d, *J* = 8.6 Hz), 33.2, 32.2 (d, *J* = 26.8 Hz), 31.8, 24.9. **<sup>19</sup>F NMR** (CDCl<sub>3</sub>, 282 MHz): δ -101.52 (dt, *J* = 39.2 Hz, 18.3 Hz). **HRMS (EI)**: *m/z* calcd. for C<sub>12</sub>H<sub>14</sub>BrF [M]<sup>+</sup>: 256.0263; found: 256.0260.

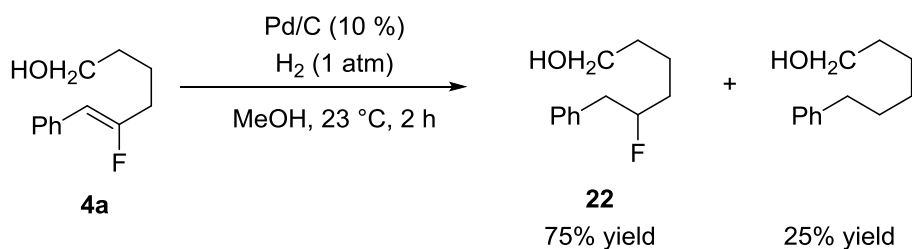

**5-fluoro-6-phenylhexan-1-ol (22)**: A vial was charged with **4a** (38.8 mg, 0.200 mmol) and Pd/C (3.9 mg) and MeOH (1 mL). The vial was purged three times with H<sub>2</sub>, and the reaction mixture was allowed to stir under H<sub>2</sub> atmosphere at room temperature for 1 h. After the reaction was completed, the hydrogen was released and the solvent was evaporated under reduced pressure. The crude product was purified by column chromatography (hexane:ethyl acetate = 10:1) to produce the products **22** in 75% yield. The corresponding defluorinated product was also isolated in 25% yield.

**<sup>1</sup>H NMR** (CDCl<sub>3</sub>, TMS, 500 MHz): δ 7.31 (t, *J* = 7.5 Hz, 2H), 7.24-7.21 (m, 3H), 4.77-4.62 (m, 1H), 3.64 (t, *J* = 6.0 Hz, 2H), 3.01-2.83 (m, 2H), 1.72-1.47 (m, 7H). **<sup>13</sup>C NMR** (CDCl<sub>3</sub>, 125 MHz): δ 137.3 (d, *J* = 4.8 Hz), 129.3, 128.4, 126.5, 94.4 (d, *J* = 169.9 Hz), 62.6, 41.6 (d, *J* = 21.4 Hz), 34.3 (d, *J* = 20.8 Hz), 32.4, 21.4 (d, *J* = 4.1 Hz). **<sup>19</sup>F NMR** (CDCl<sub>3</sub>, 282 MHz): δ -178.56--179.06 (m, 1F). **HRMS (ESI)**: *m/z* calcd. for C<sub>12</sub>H<sub>17</sub>ONaF [M+Na]<sup>+</sup>: 219.1156; found: 219.1164.

**The defluorinated product: 6-phenylhexan-1-ol**: **<sup>1</sup>H NMR** (CDCl<sub>3</sub>, TMS, 500 MHz): δ 7.29-7.27 (m, 2H), 7.19-7.17 (m, 3H), 3.63 (t, *J* = 6.0 Hz, 2H), 2.62 (t, *J* = 7.5

Hz, 2H), 1.67-1.38 (m, 9H).  $^{13}\text{C}$  NMR ( $\text{CDCl}_3$ , 125 MHz):  $\delta$  142.7, 128.4, 128.2, 125.6, 63.0, 35.8, 32.7, 31.4, 29.0, 25.6.

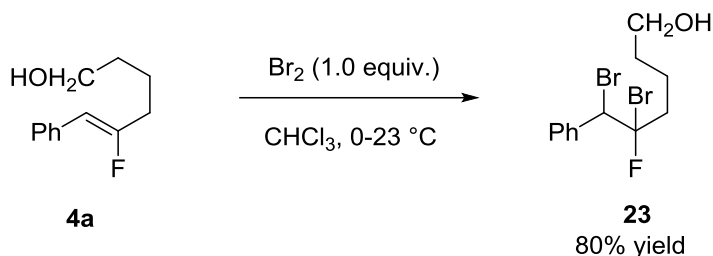

**5,6-dibromo-5-fluoro-6-phenylhexan-1-ol (23):** To a solution of **4a** (38.8 mg, 0.200 mmol) in 1 mL  $\text{CHCl}_3$  was added bromine (63.2 mg, 0.400 mmol) dropwise at 0  $^\circ\text{C}$ . The mixture was allowed to warm to ambient temperature and stir overnight. The reaction mixture was quenched with aqueous  $\text{Na}_2\text{S}_2\text{O}_3$  and extracted with  $\text{CH}_2\text{Cl}_2$ . The combined organic layer was washed with brine, dried over  $\text{MgSO}_4$  and concentrated. The residue was purified by column chromatography (hexanes:ethyl acetate = 1:1) to give the corresponding product **23** in 80% yield.

$^1\text{H}$  NMR ( $\text{CDCl}_3$ , TMS, 500 MHz):  $\delta$  7.52-7.51 (m, 2H), 7.37-7.36 (m, 3H), 5.20 (d,  $J = 24.5$  Hz, 1H), 3.72 (t,  $J = 6.0$  Hz, 2H), 2.58-2.36 (m, 2H), 1.80-1.66 (m, 4H), 1.60 (brs, 1H).  $^{13}\text{C}$  NMR ( $\text{CDCl}_3$ , 125 MHz):  $\delta$  137.5, 129.8 (d,  $J = 2.6$  Hz), 129.1, 128.3, 111.8 (d,  $J = 263.9$  Hz), 62.4, 57.7 (d,  $J = 21.0$  Hz), 43.1 (d,  $J = 20.4$  Hz), 31.8, 21.5 (d,  $J = 5.4$  Hz).  $^{19}\text{F}$  NMR ( $\text{CDCl}_3$ , 282 MHz):  $\delta$  -108.59 (t,  $J = 21.2$  Hz). HRMS (EI):  $m/z$  calcd. for  $\text{C}_{12}\text{H}_{15}\text{Br}_2\text{FO}$   $[\text{M}]^+$ : 353.9453; found: 353.9461.

The *trans* configuration of **23** was determined by 2D ( $^1\text{H}$ - $^1\text{H}$ ) NMR measurement as shown below (Figure S3).

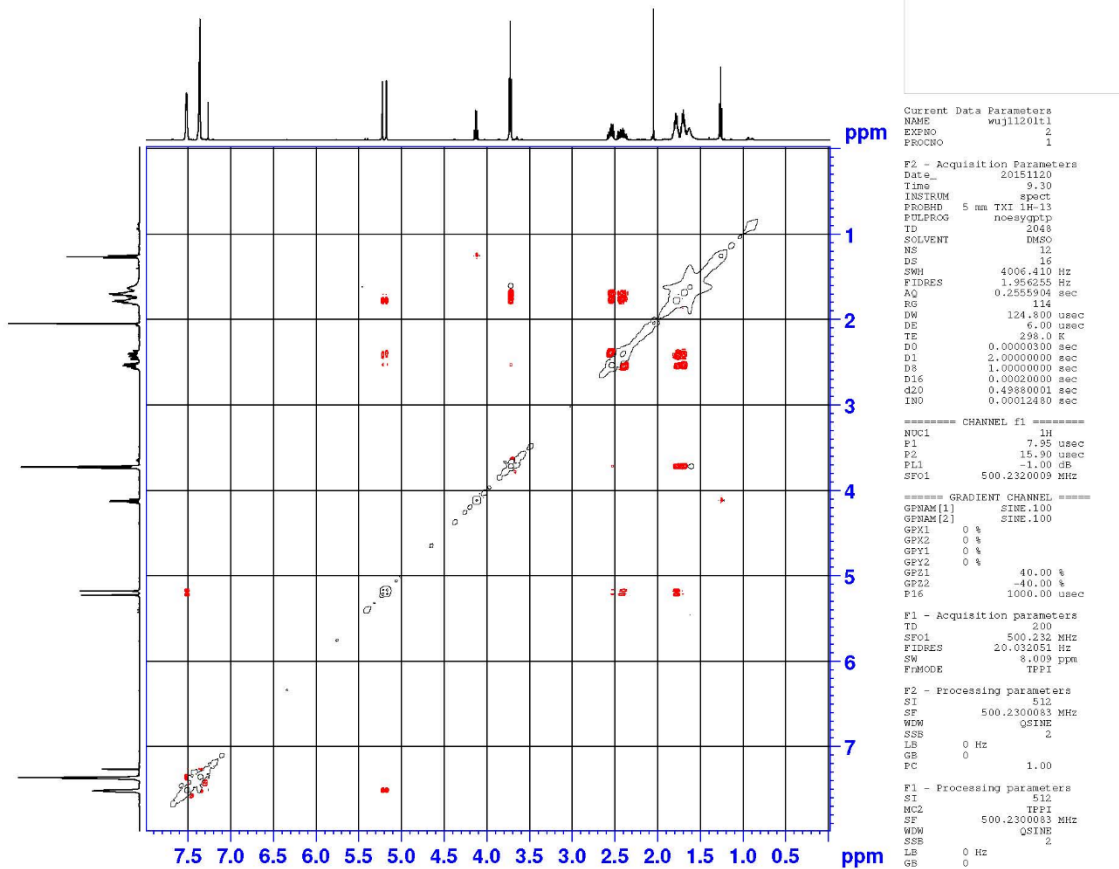

Figure S3. 2D ( $^1\text{H}$ - $^1\text{H}$ ) NMR spectra of **23**.

### **XIII. References**

- 1) Lu, S.-M., Bolm, C. *Angew. Chem. Int. Ed.* **2008**, *47*, 8920–8923.
- 2) Xu, J., Burton, D. J., *J. Org. Chem.* **2006**, *71*, 3743–3747.
- 3) Zhang, W., Huang, W., Hu, J. *Angew. Chem. Int. Ed.* **2009**, *48*, 9858–9861.
- 4) Zhao, Y., Jiang, F., Hu, J. *J. Am. Chem. Soc.* **2015**, *137*, 5199–5203.
- 5) Chen, C., Wilcoxon, K., Zhu, Y.-F., Kim, K., McCarthy, J. R. *J. Org. Chem.* **1999**, *64*, 3476–3482.

# XIV. $^1\text{H}$ NMR, $^{13}\text{C}$ NMR and $^{19}\text{F}$ NMR Spectra

9.806  
9.803  
9.801

7.475  
7.460  
7.337  
7.322  
7.306  
7.260  
7.233  
7.218  
7.204

5.536  
5.458

2.572  
2.557  
2.543  
2.427  
2.412  
2.390  
2.360  
1.981  
1.966  
1.952  
1.937

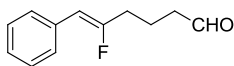

2a

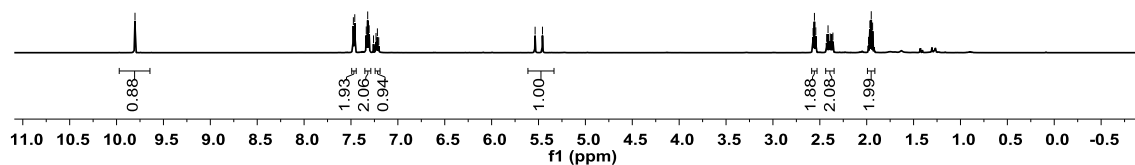

201.559

160.662  
158.544

133.446  
133.426  
128.394  
128.312  
128.253  
126.866  
126.848

106.763  
106.695

77.254 CDCl3  
77.000 CDCl3  
76.746 CDCl3

42.578  
32.287  
32.072  
18.804

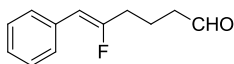

2a

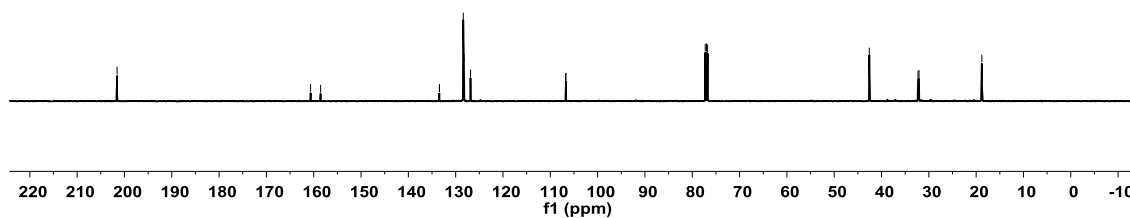

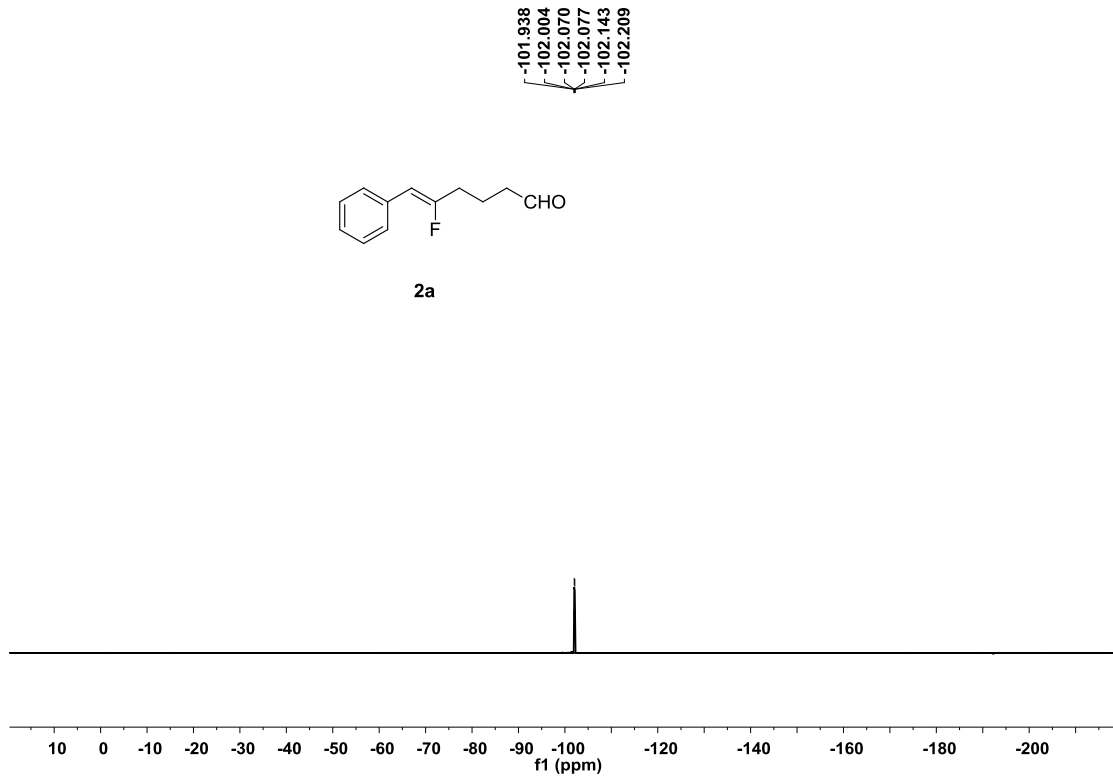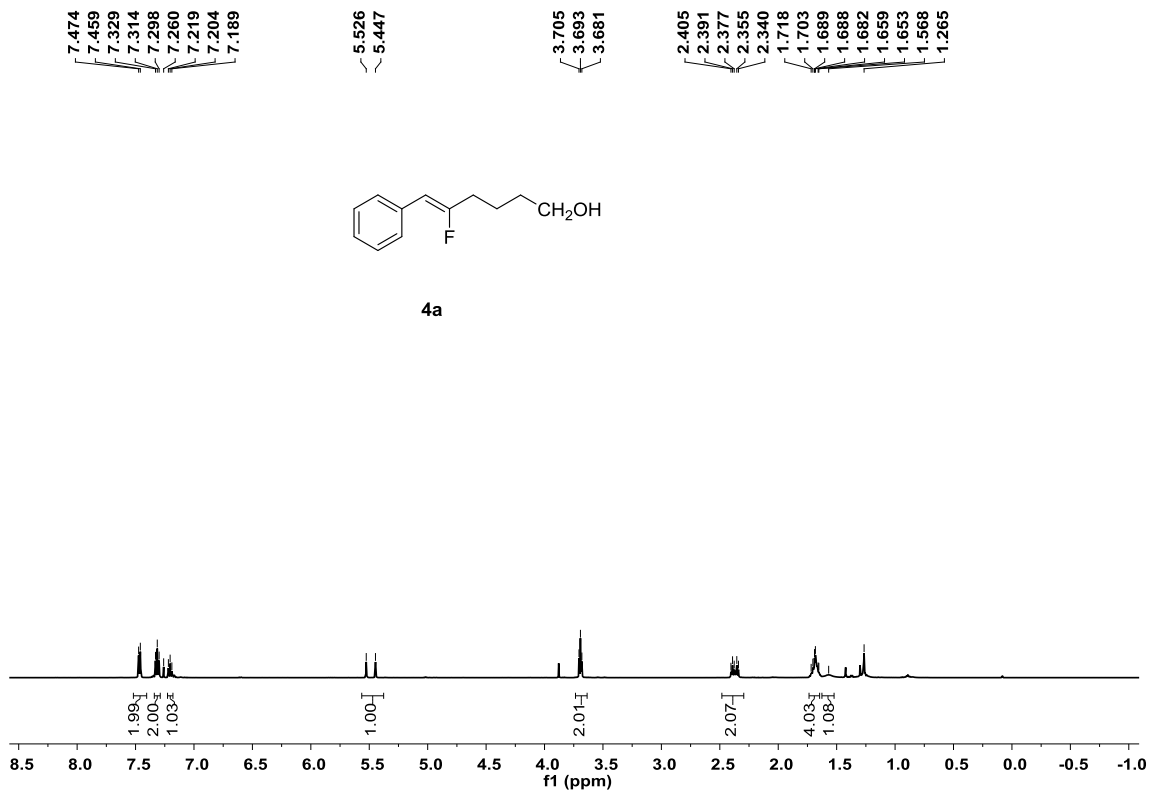

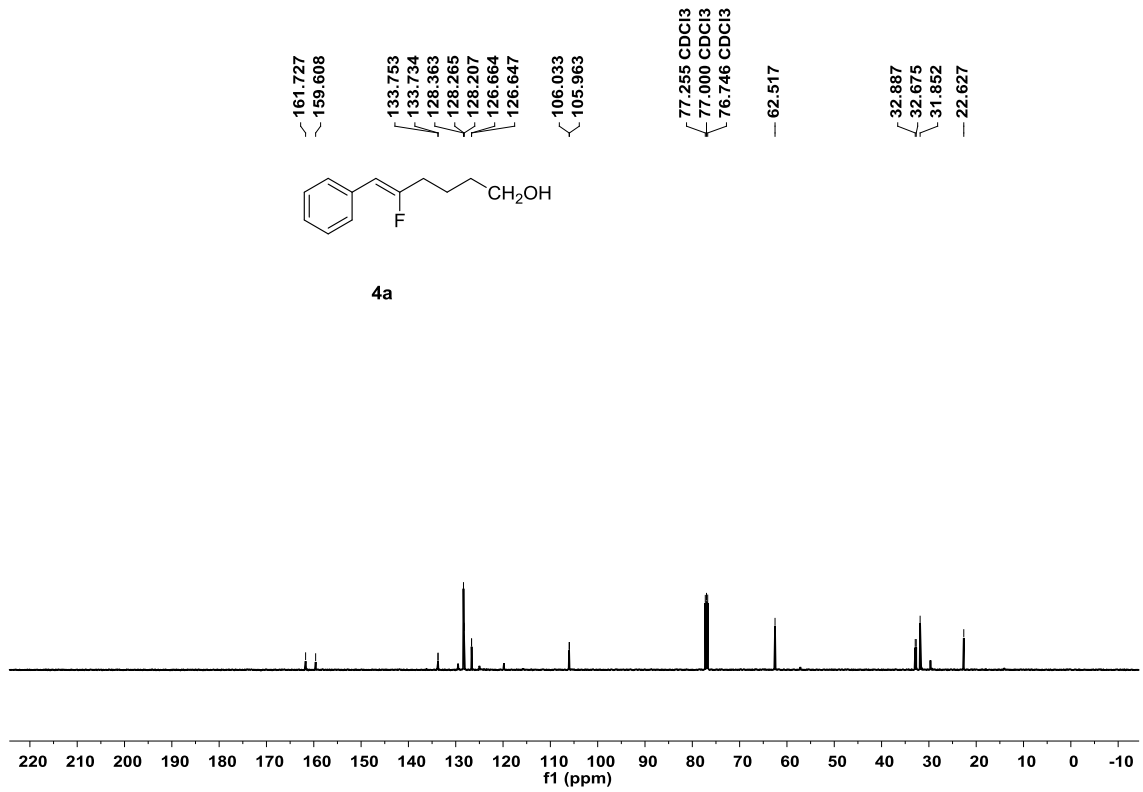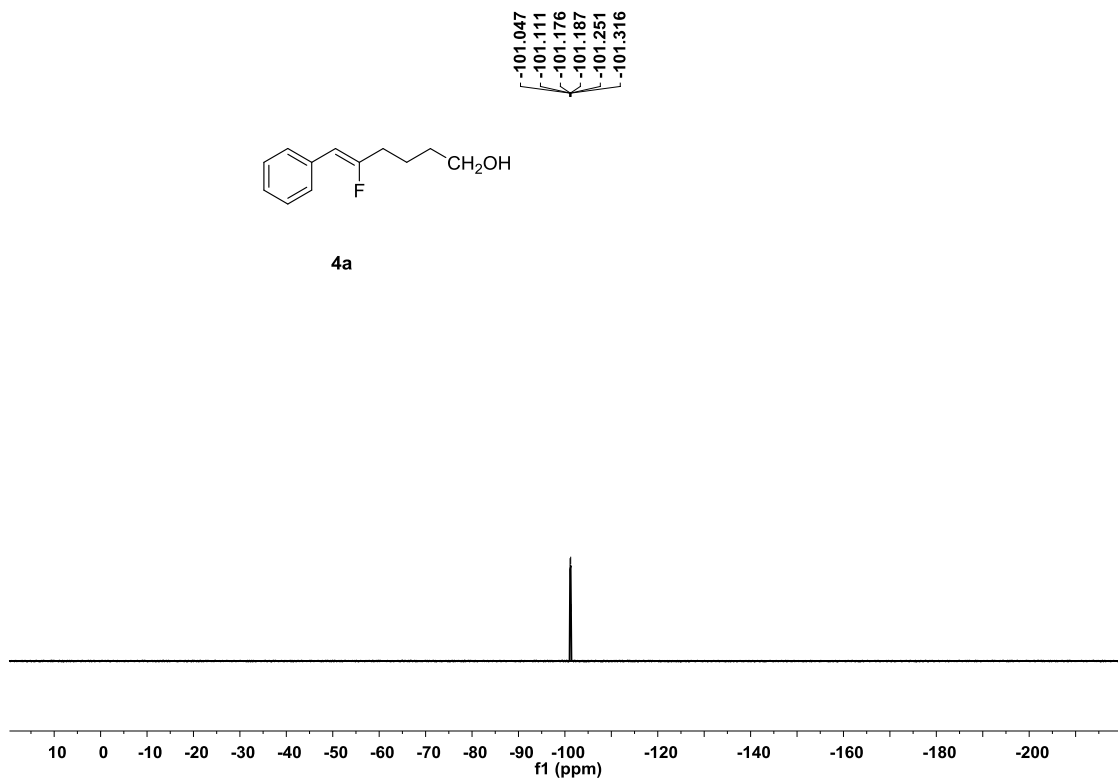

7.393  
7.376  
7.277  
7.260

5.482  
5.404

3.705  
3.692  
3.681

2.395  
2.381  
2.359  
2.331  
1.712  
1.697  
1.689  
1.675  
1.657  
1.644  
1.542

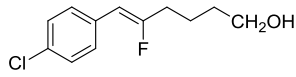

4b

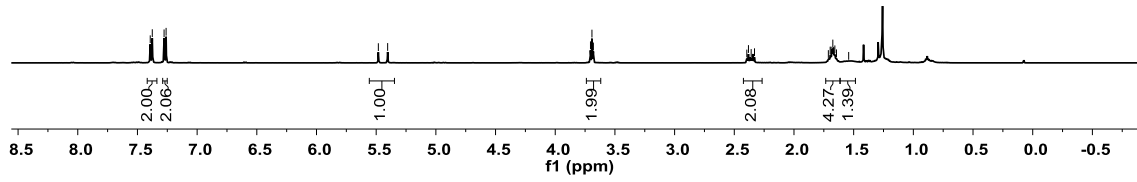

162.248  
160.121

132.204  
129.500  
129.439  
128.507

105.059  
104.990

77.254 CDCl3  
77.000 CDCl3  
76.746 CDCl3

62.491

32.874  
32.663  
31.843  
29.679  
22.595

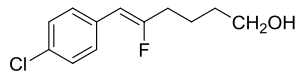

4b

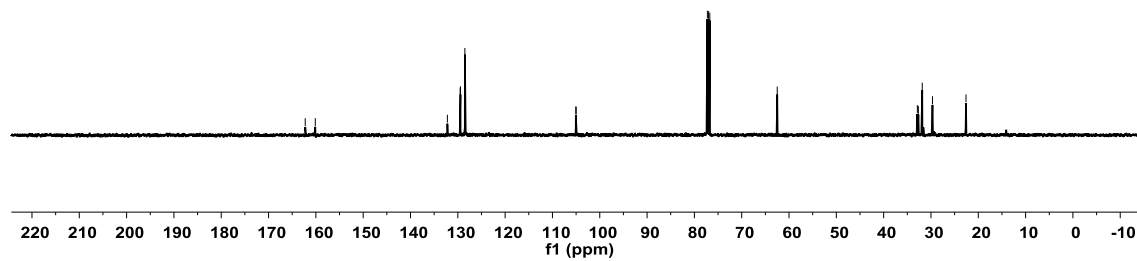



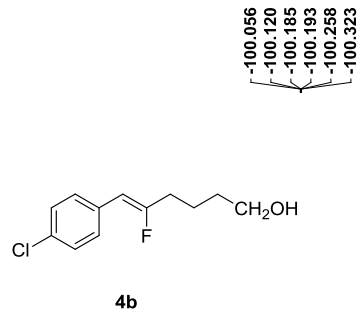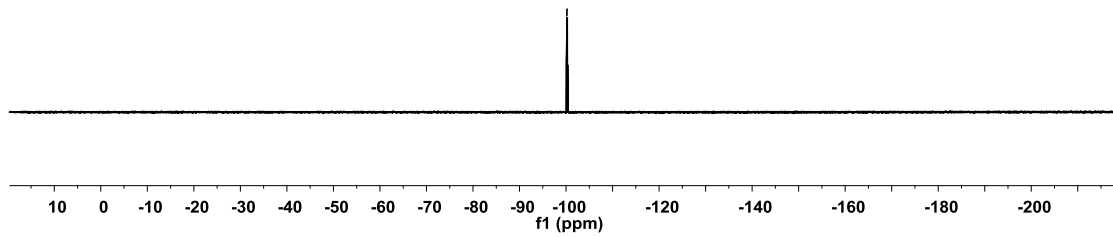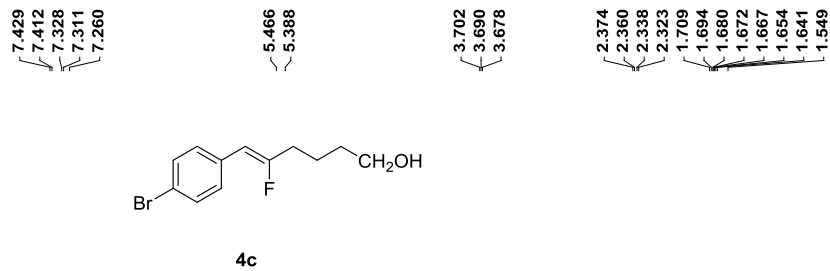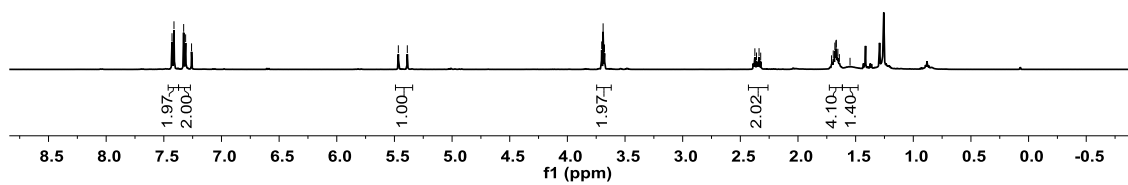

162.388  
160.258

132.661  
131.464  
129.820  
129.759  
120.337  
120.309

105.111  
105.041

77.254 CDC13  
77.000 CDC13  
76.746 CDC13

62.486

32.898  
32.688  
31.835  
29.676  
22.566

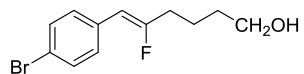

4c

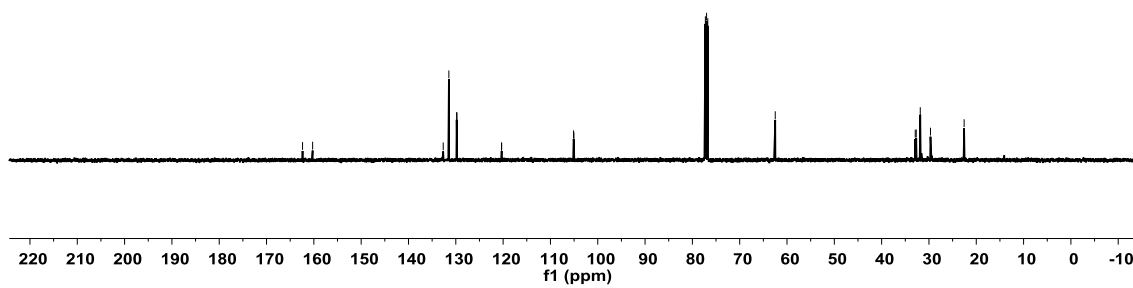

-99.637  
-99.702  
-99.766  
-99.775  
-99.839  
-99.904

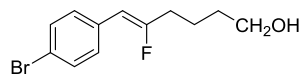

4c

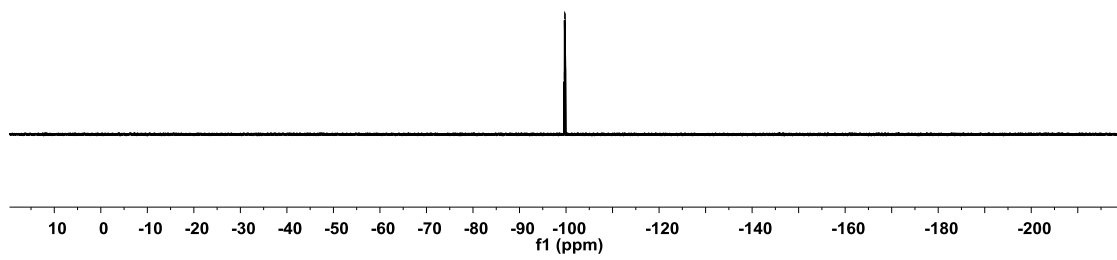

7.438  
7.427  
7.420  
7.409  
7.260  
7.008  
6.991  
6.973

5.483  
5.405

3.700  
3.688  
3.676

2.388  
2.374  
2.338  
2.323  
1.706  
1.691  
1.677  
1.655  
1.629  
1.256

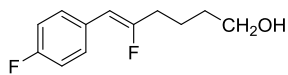

4d

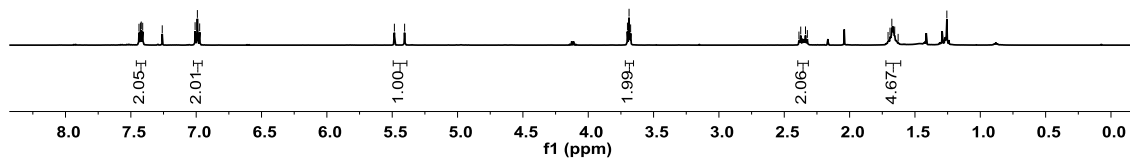

162.402  
161.419  
160.444  
159.305

129.866  
129.805  
129.744

115.310  
115.140  
104.978  
104.907

77.254 CDCl3  
77.000 CDCl3  
76.746 CDCl3

62.490

32.800  
32.588  
31.845  
22.614

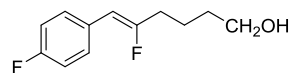

4d

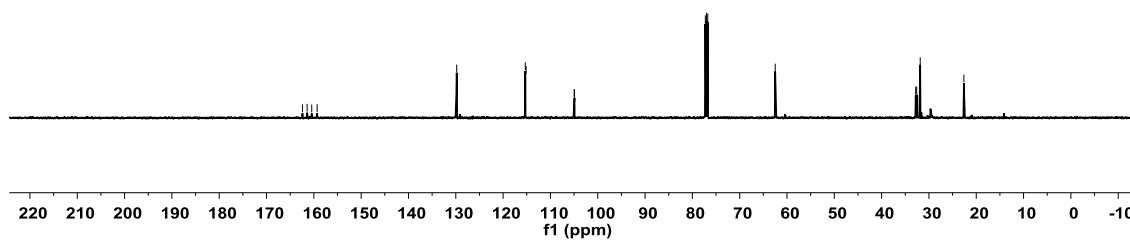

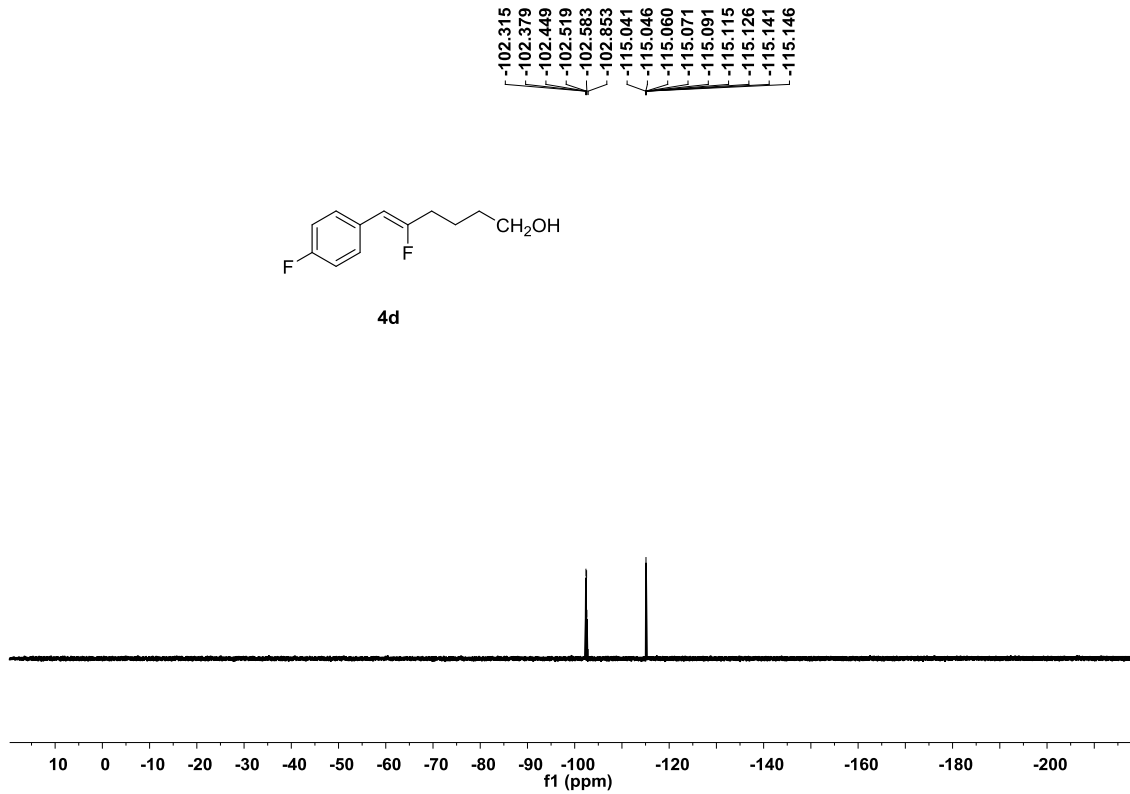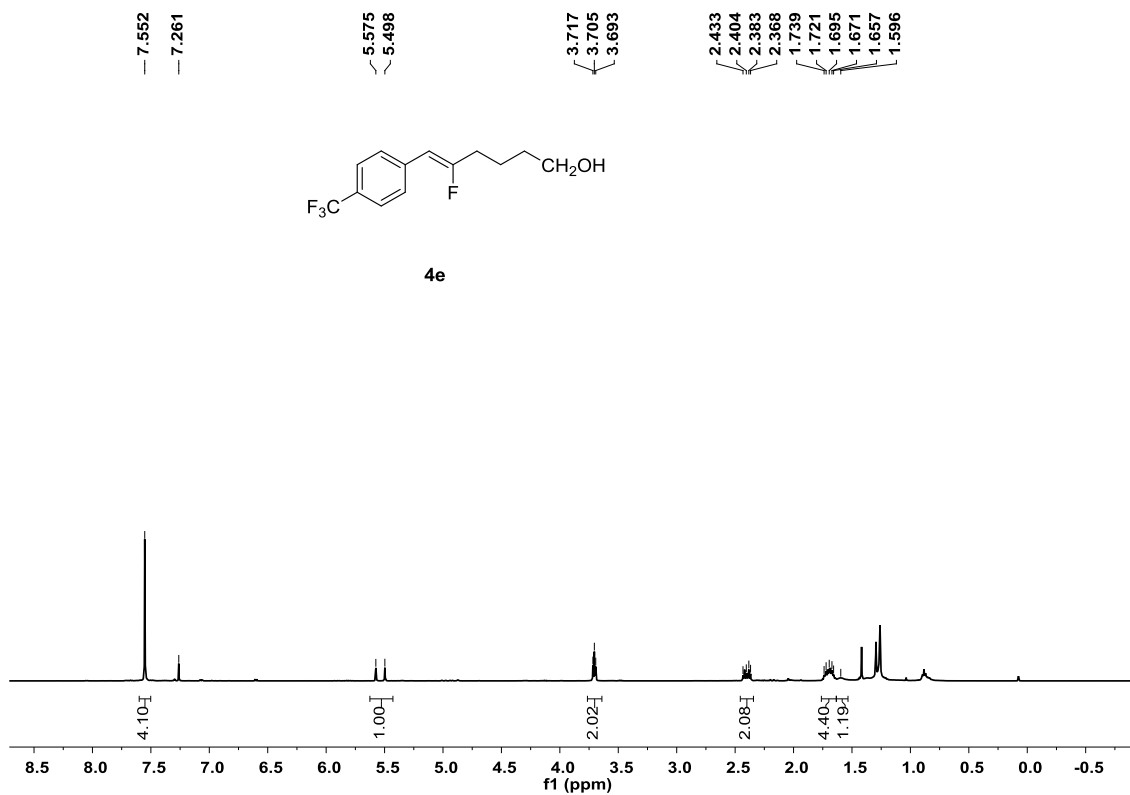

163.607  
 161.460  
 137.281  
 128.373  
 128.312  
 125.294  
 125.263  
 123.114  
 122.003  
 115.889  
 105.138  
 105.072  
 77.254 CDC13  
 77.000 CDC13  
 76.746 CDC13  
 62.466  
 32.937  
 32.728  
 31.839  
 29.687  
 22.577

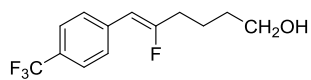

4e

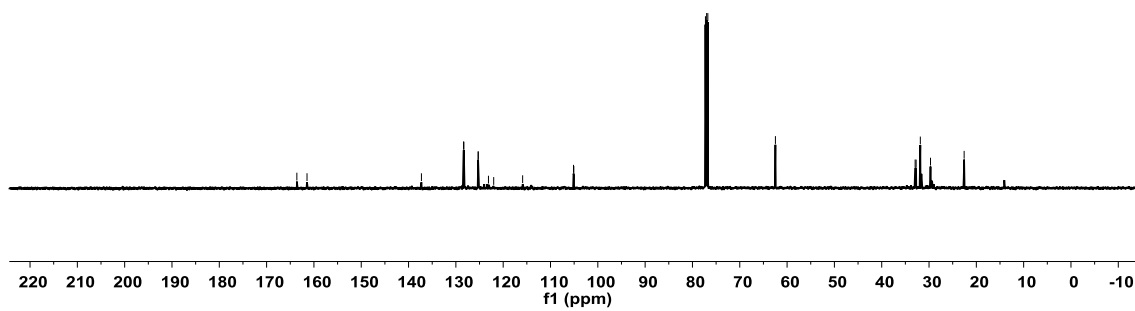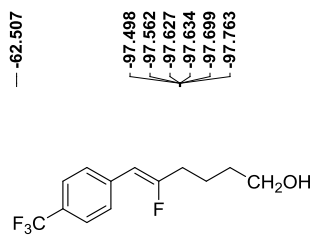

4e

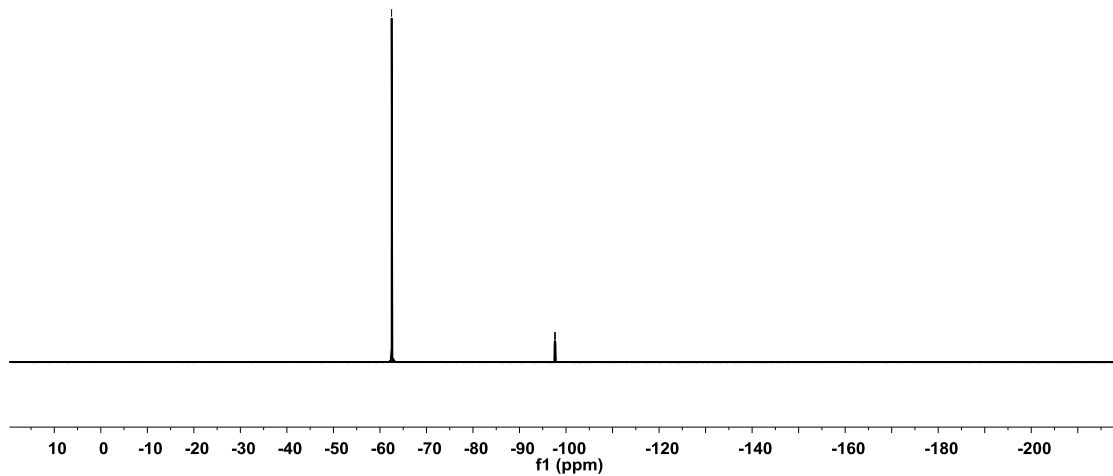

7.367  
7.351  
7.260  
7.130  
7.114

5.489  
5.410

3.701  
3.689  
3.677

2.391  
2.363  
2.341  
2.331  
1.694  
1.690  
1.680  
1.674  
1.485

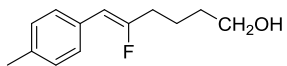

4f

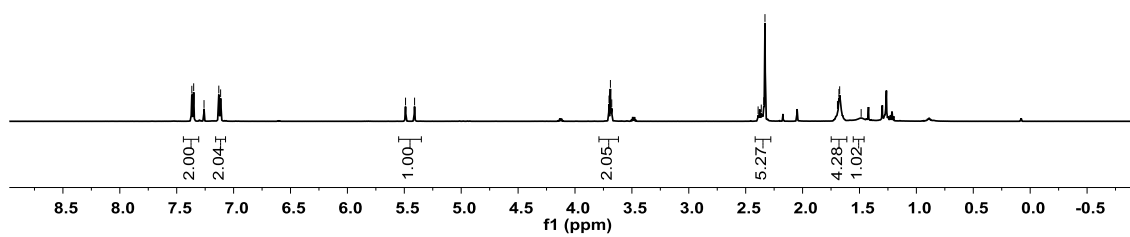

161.136  
159.026

136.390  
136.371  
130.865  
129.065  
128.164  
128.106

105.869  
105.798

77.253 CDCl3  
77.000 CDCl3  
76.745 CDCl3

62.549

32.871  
32.658  
31.883  
22.653  
21.141

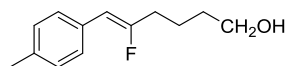

4f

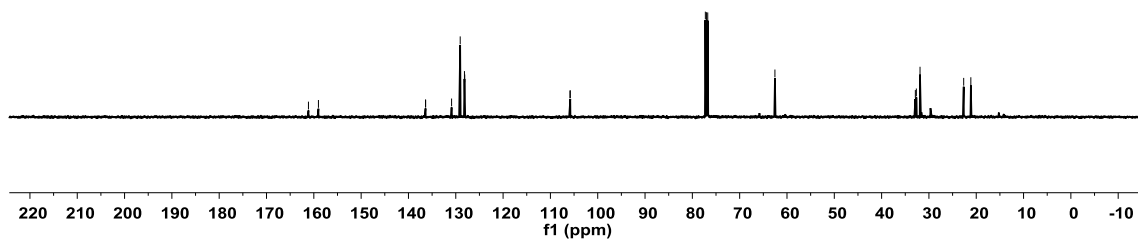

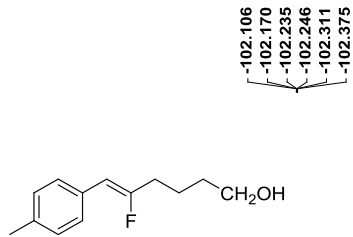

4f

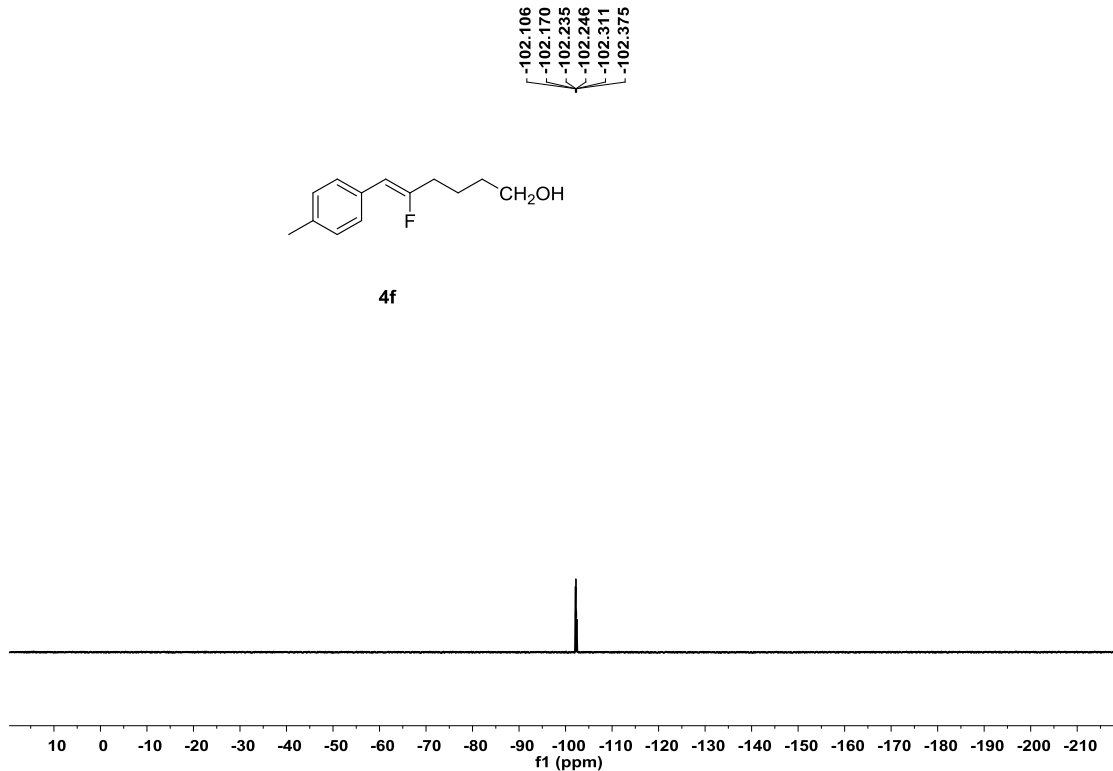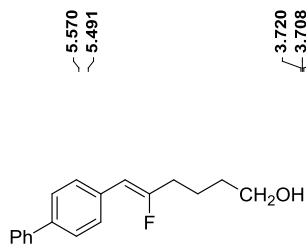

4g

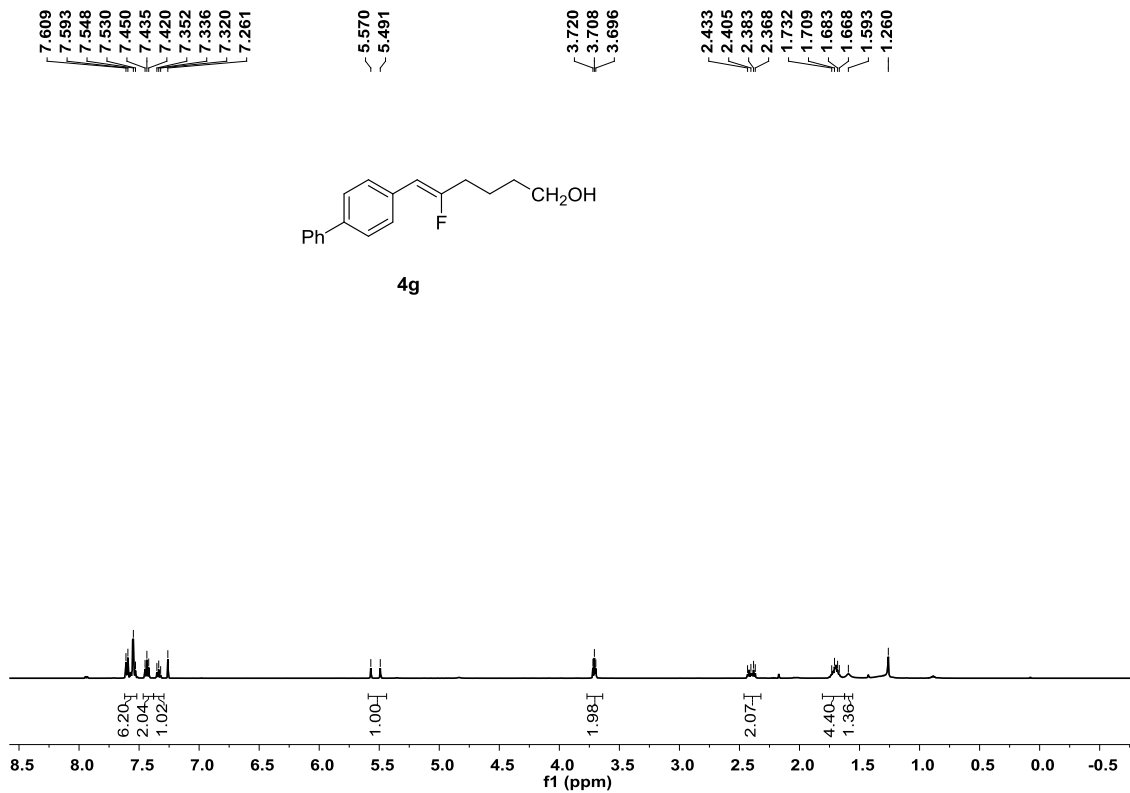

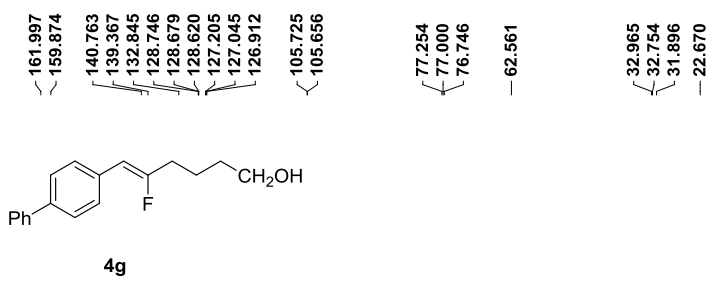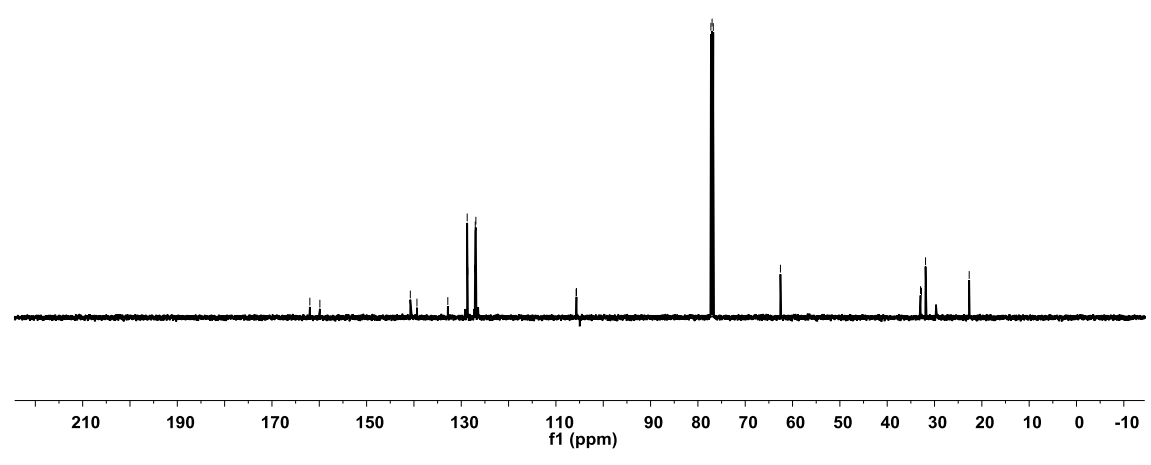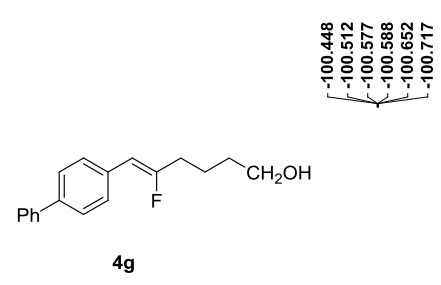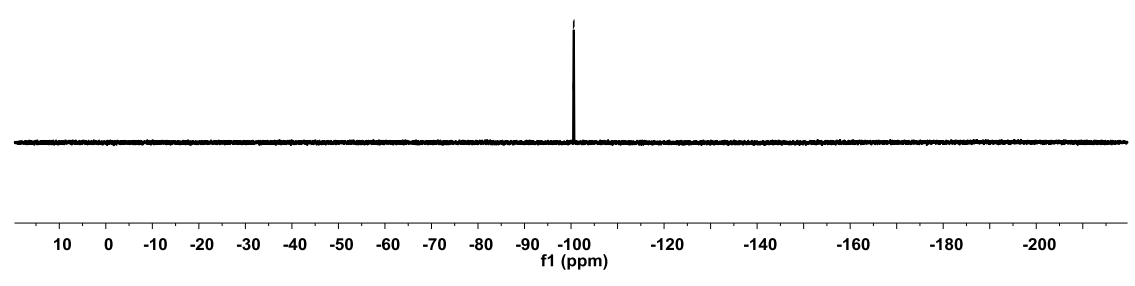



7.413  
7.396  
7.261  
6.863  
6.845

5.459  
5.379

3.803  
3.699  
3.687  
3.675

2.380  
2.367  
2.353  
2.344  
2.331  
2.317  
1.711  
1.692  
1.675  
1.663  
1.625  
1.544  
1.261

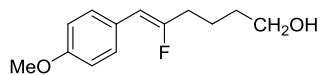

4h

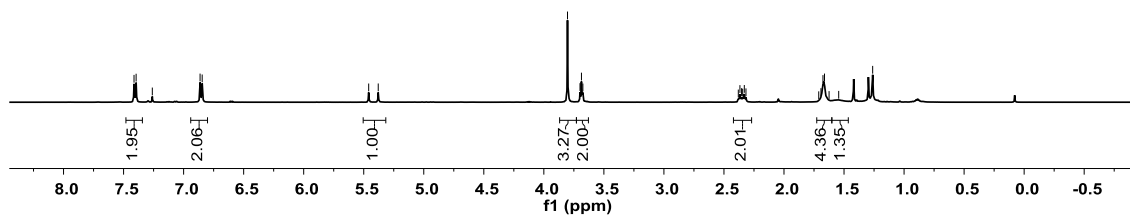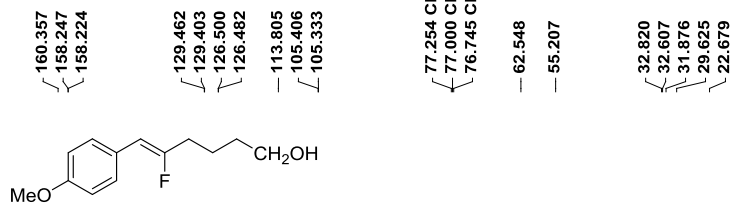

4h

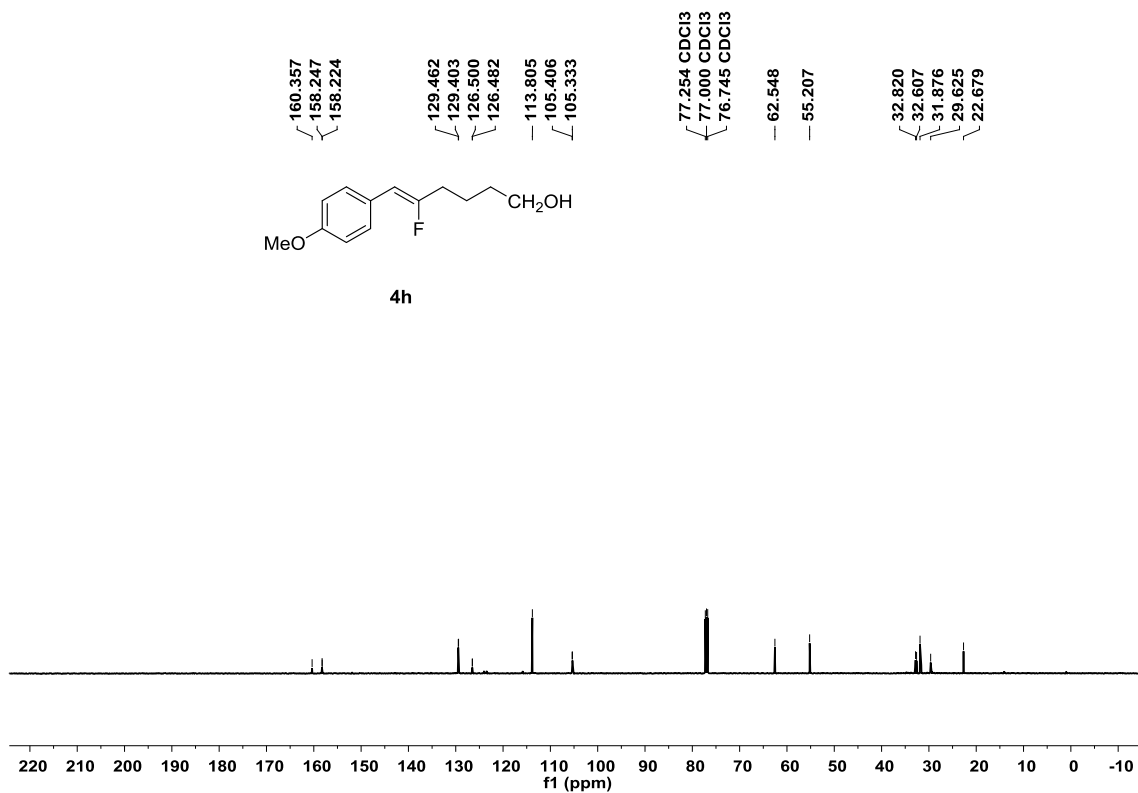

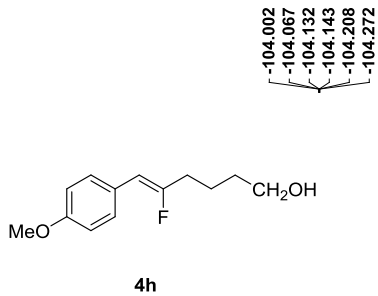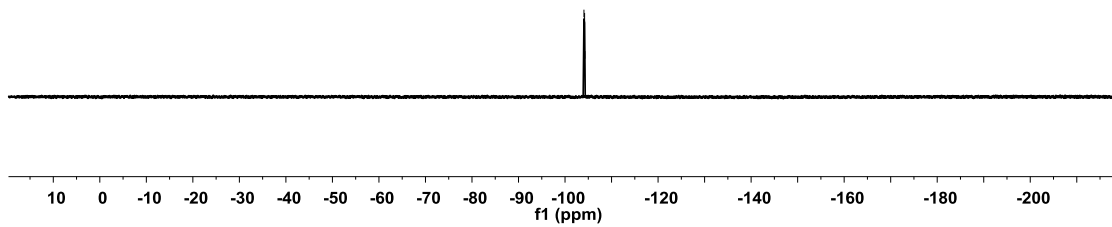

Jun02psb.22.fid  
tl-4-130

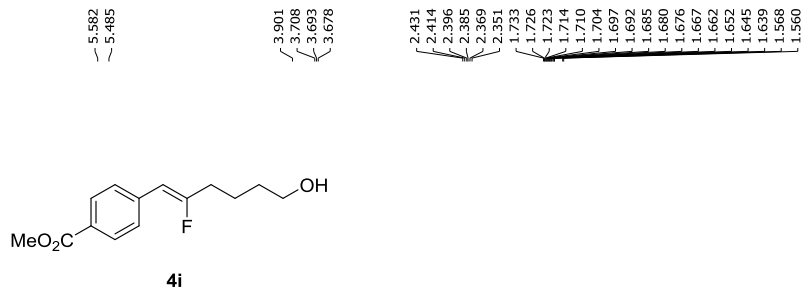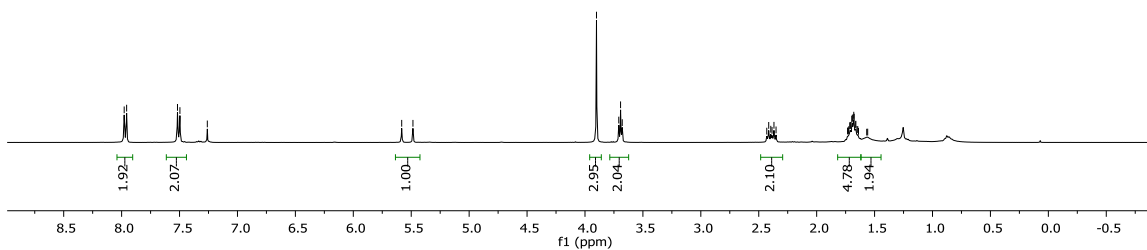

Jun02psb.31.fid  
tl-4-130

166.919  
163.925  
161.237

138.422  
138.397  
128.703  
128.113  
128.036

105.591  
105.508

77.333  
77.016  
76.698

62.453

52.010

33.046  
32.785  
31.859  
22.611

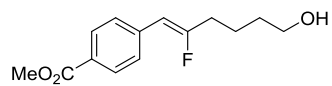

4i

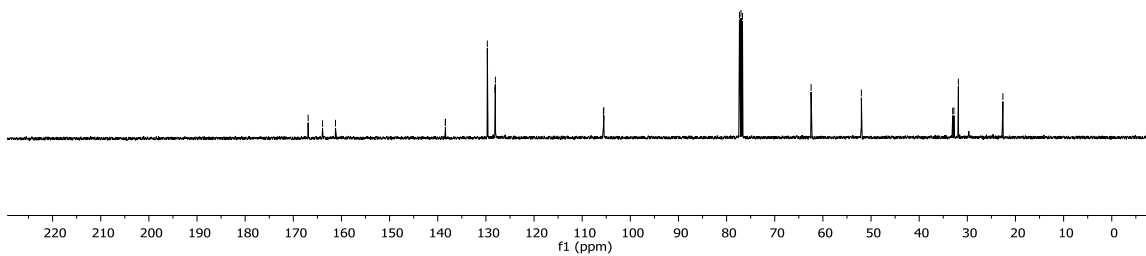

Jun01wyn.13.fid  
tl-4-130

96.813  
96.861  
96.910  
96.917  
96.964  
97.013

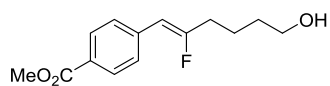

4i

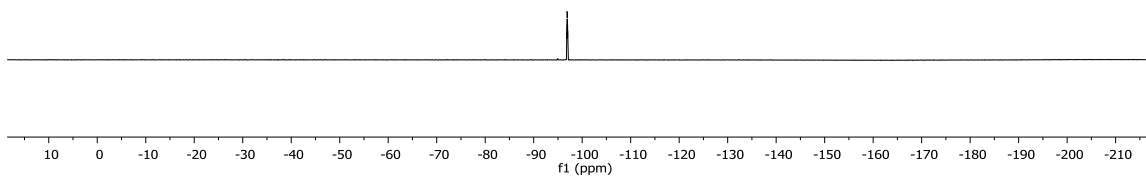

Jun06psb.22.fid  
tl-04-137

7.583  
7.562  
7.533  
7.512  
7.260

5.569  
5.473

3.707  
3.692  
3.677

2.439  
2.422  
2.403  
2.383  
2.376  
2.358  
1.724  
1.725  
1.716  
1.711  
1.705  
1.698  
1.694  
1.687  
1.679  
1.675  
1.671  
1.662  
1.656  
1.647  
1.639  
1.633  
1.565  
1.547  
1.529  
1.511  
1.500

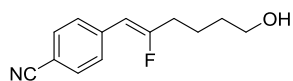

4j

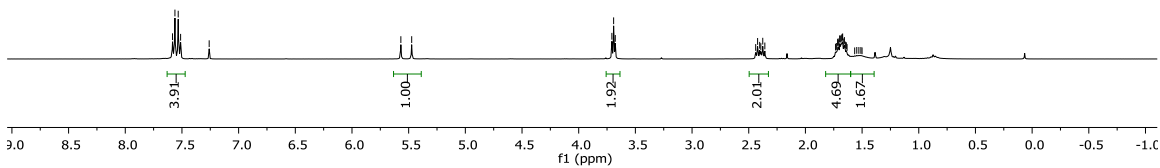

Jun06psb.23.fid  
tl-04-137

164.921  
162.217

138.441  
138.416  
132.161  
128.691  
128.611  
118.997  
109.875  
109.845  
105.103  
105.022

77.338  
77.020  
76.703

62.370

33.030  
32.772  
31.804  
22.561

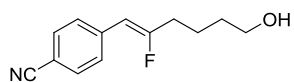

4j

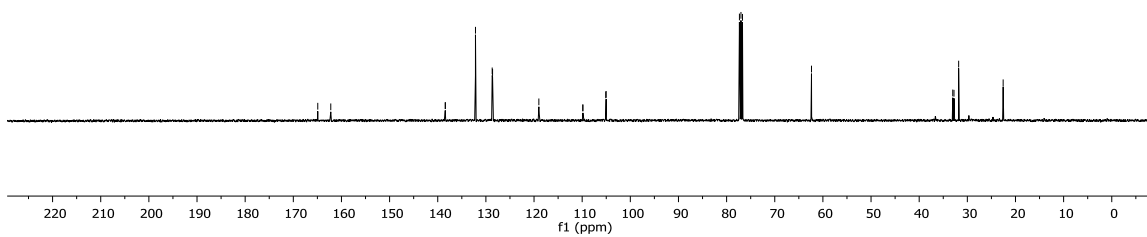

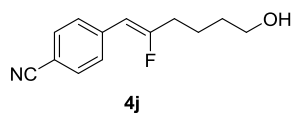

-95.075  
-95.124  
-95.174  
-95.225  
-95.274

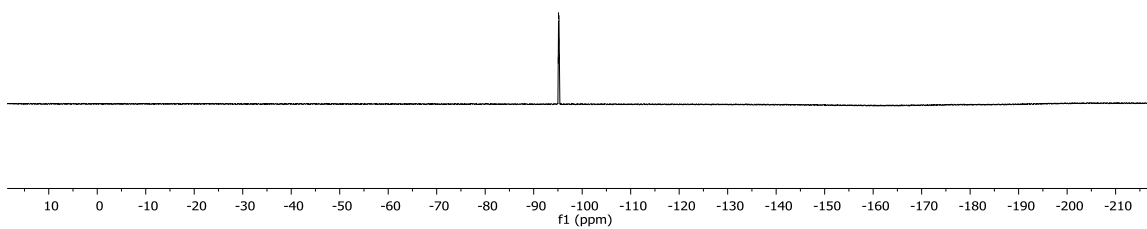

7.261  
7.238  
7.222  
7.206  
7.055  
7.051  
7.038  
7.022  
6.780  
6.775  
6.764  
6.759

5.501  
5.423

3.805  
3.702  
3.690  
3.678

2.397  
2.383  
2.360  
2.332  
1.697  
1.694  
1.689  
1.676  
1.671  
1.662  
1.660

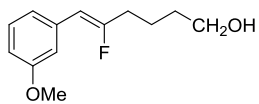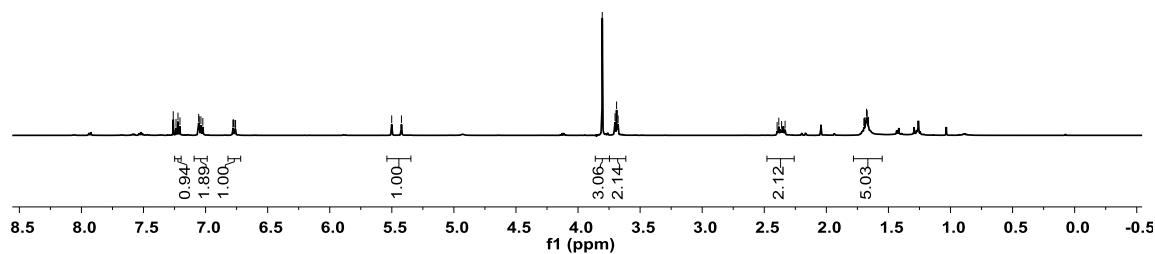

161.942  
159.818  
159.542

129.275  
126.383  
120.937  
120.882  
113.628  
113.563  
112.516  
105.984  
105.918

77.254  
77.000  
76.745

62.517  
55.154

32.905  
32.693  
31.856  
22.614

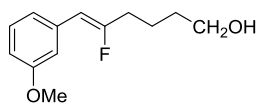

4k

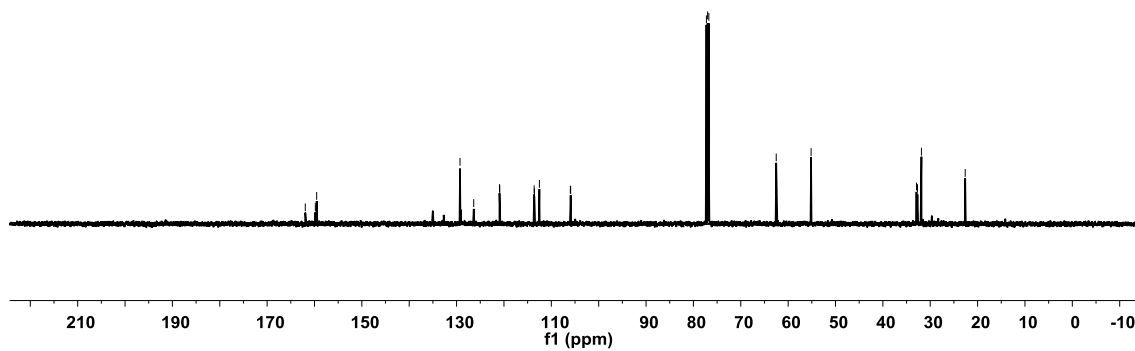

-100.181  
-100.245  
-100.310  
-100.319  
-100.384  
-100.449

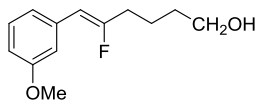

4k

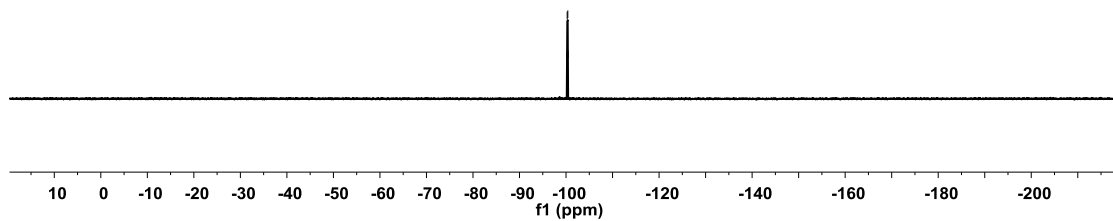

7.785  
7.769  
7.364  
7.348  
7.260  
7.241  
7.226  
7.211  
7.156  
7.141  
7.125  
5.930  
5.853

3.722  
3.709  
3.698

2.451  
2.438  
2.415  
2.387  
1.741  
1.721  
1.715  
1.701  
1.679  
1.673

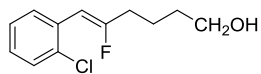

4l

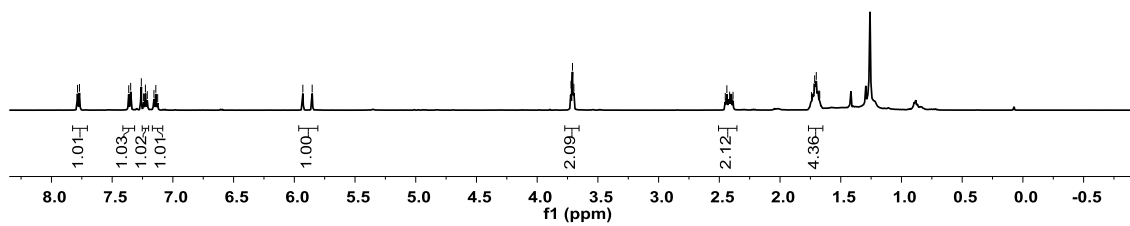

162.904  
160.766

132.342  
131.565  
130.347  
130.252  
129.315  
127.822  
126.644

102.084  
102.026

77.254 CDCl3  
77.000 CDCl3  
76.746 CDCl3

62.525

33.015  
32.804  
31.858  
29.690  
22.565

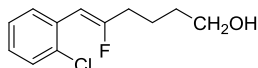

4l

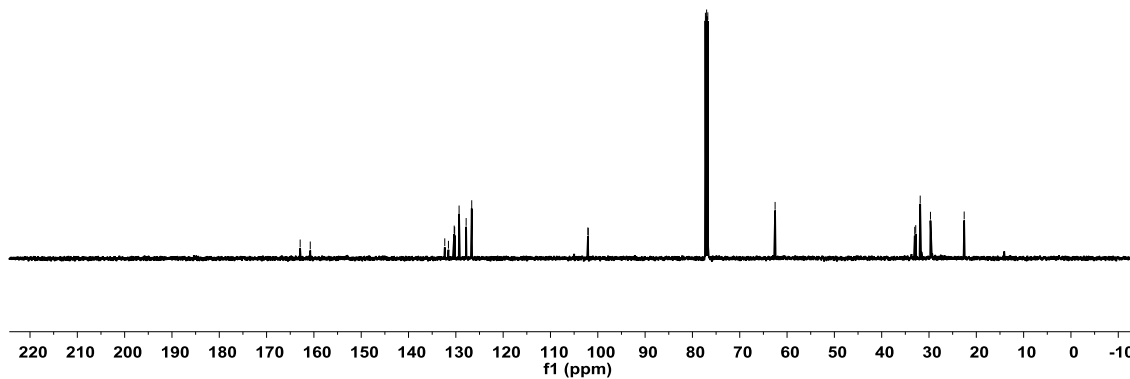

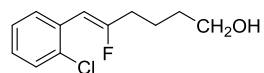

4l

-100.692  
-100.756  
-100.821  
-100.828  
-100.892  
-100.956

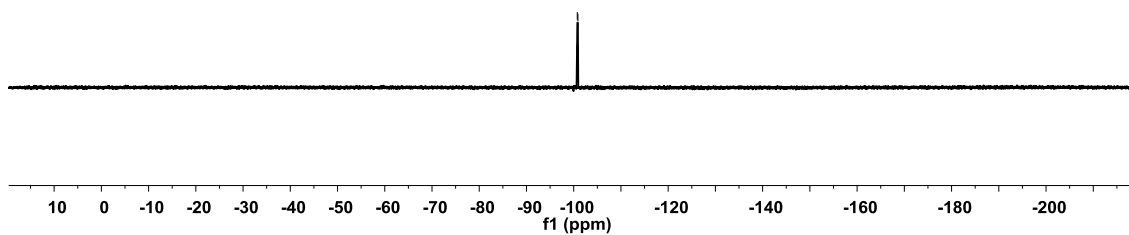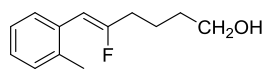

4m

7.608  
7.593  
7.261  
7.187  
7.174  
7.157  
7.143  
7.141  
7.129

5.645  
5.568

3.720  
3.708  
3.696

2.418  
2.404  
2.382  
2.368  
2.300  
1.735  
1.700  
1.666  
1.267

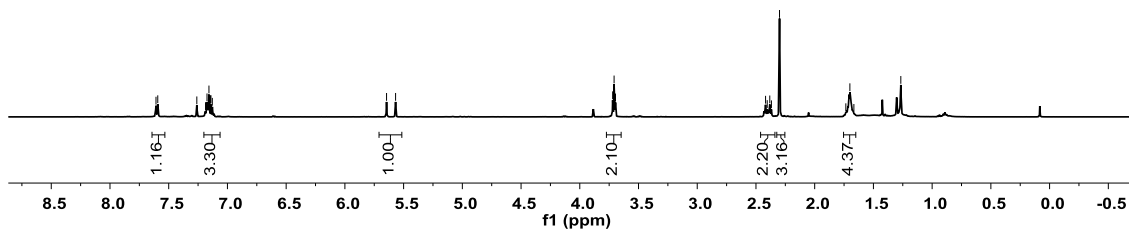



161.304  
159.196

135.338  
132.186  
129.920  
129.168  
129.093  
126.800  
125.772

103.459  
103.379

77.254 CDC13  
77.000 CDC13  
76.746 CDC13

62.533

32.899  
32.684  
31.874  
22.688  
20.131

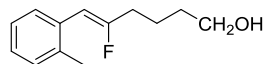

4m

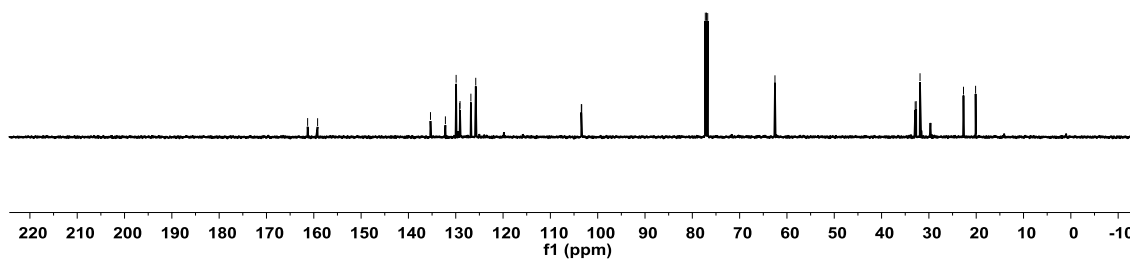

-103.483  
-103.547  
-103.612  
-103.683  
-103.747

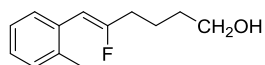

4m

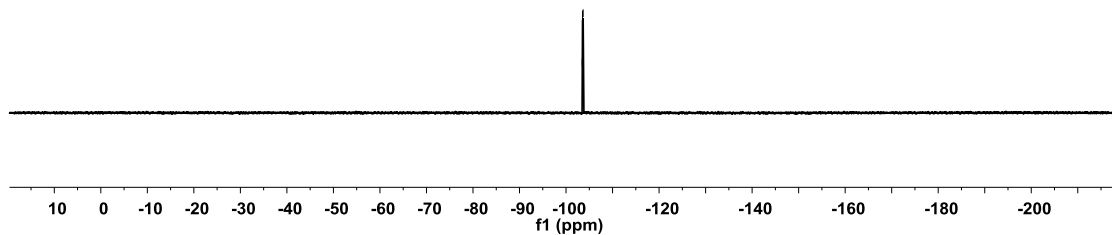

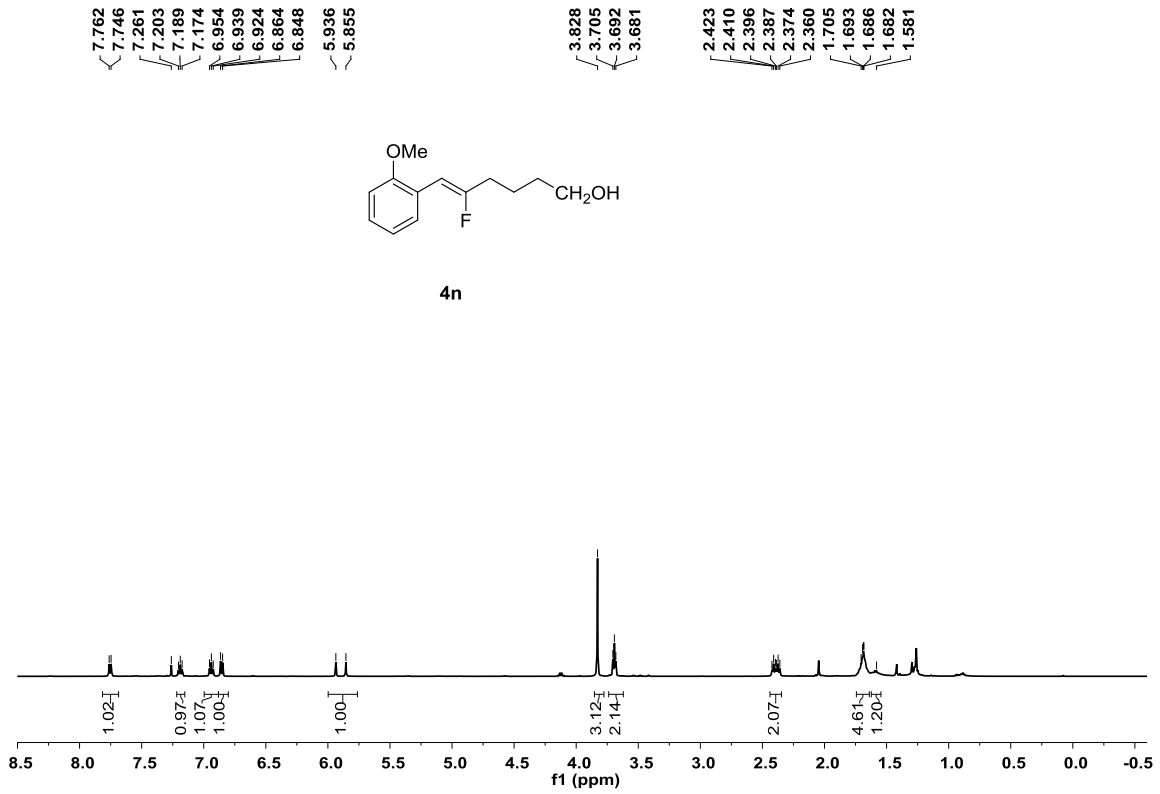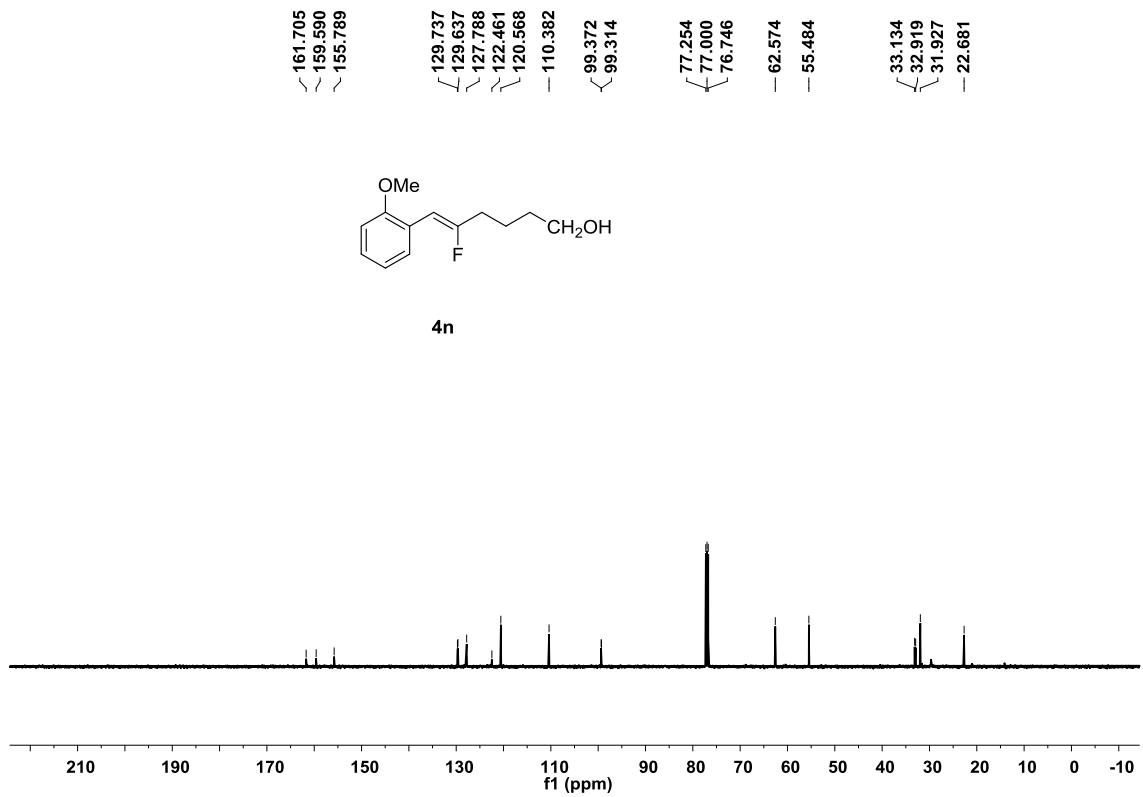

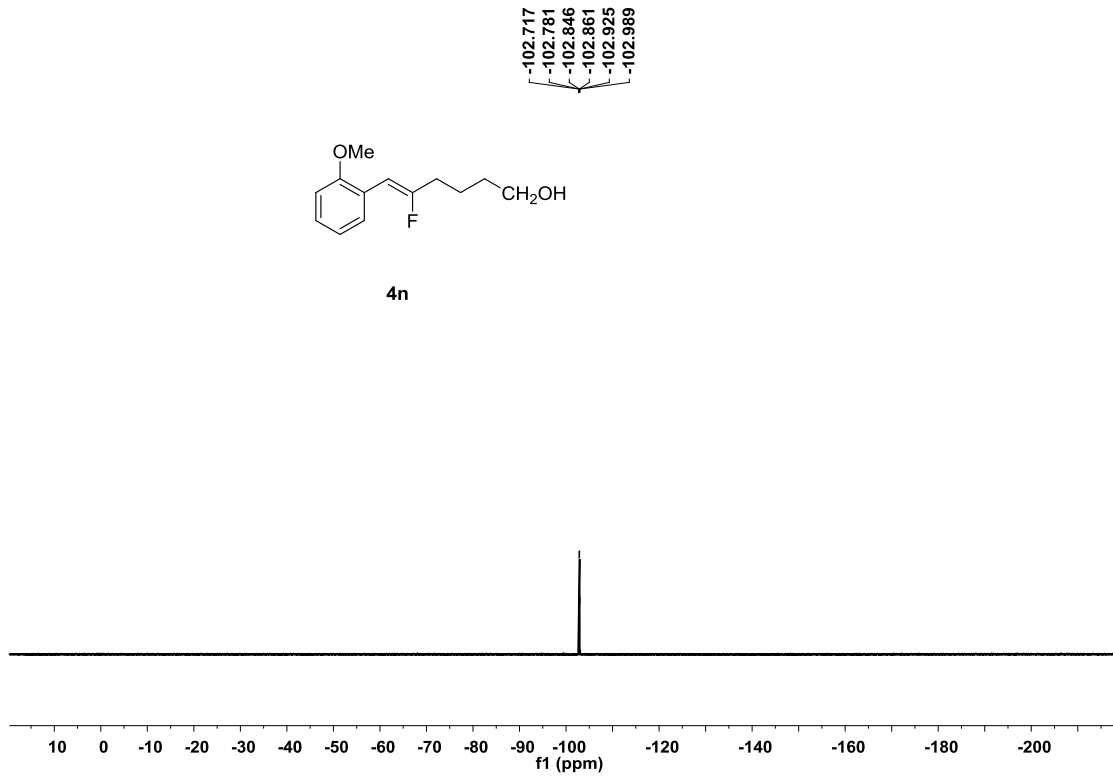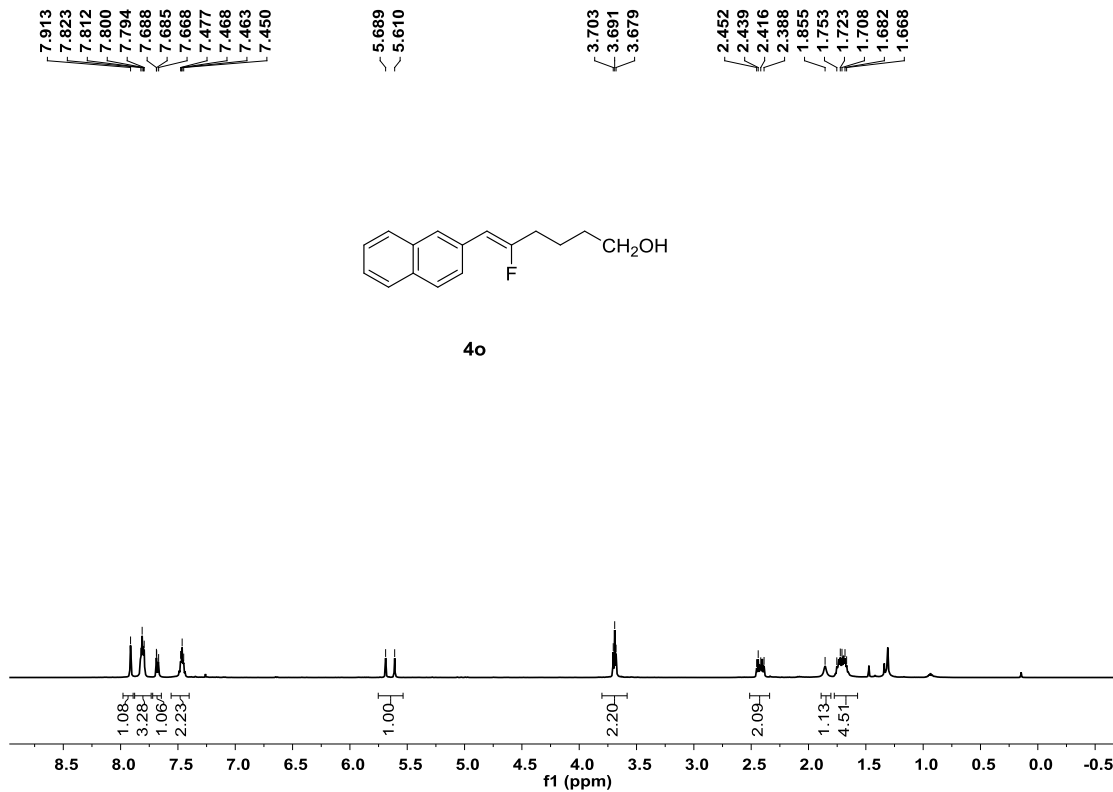

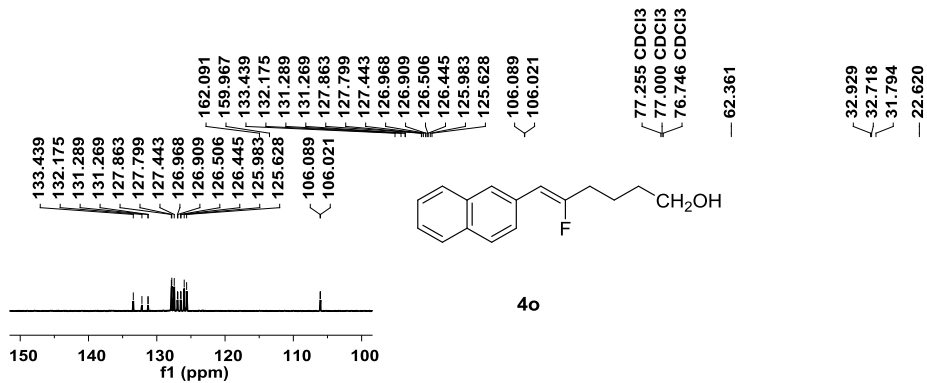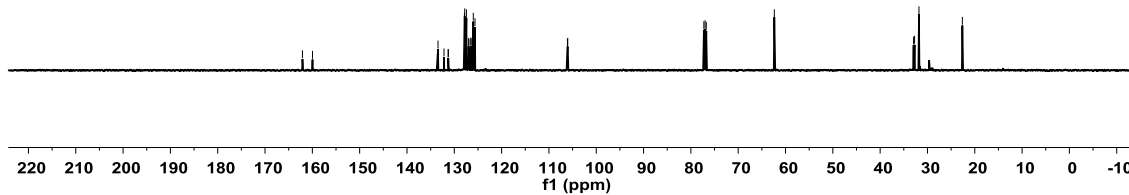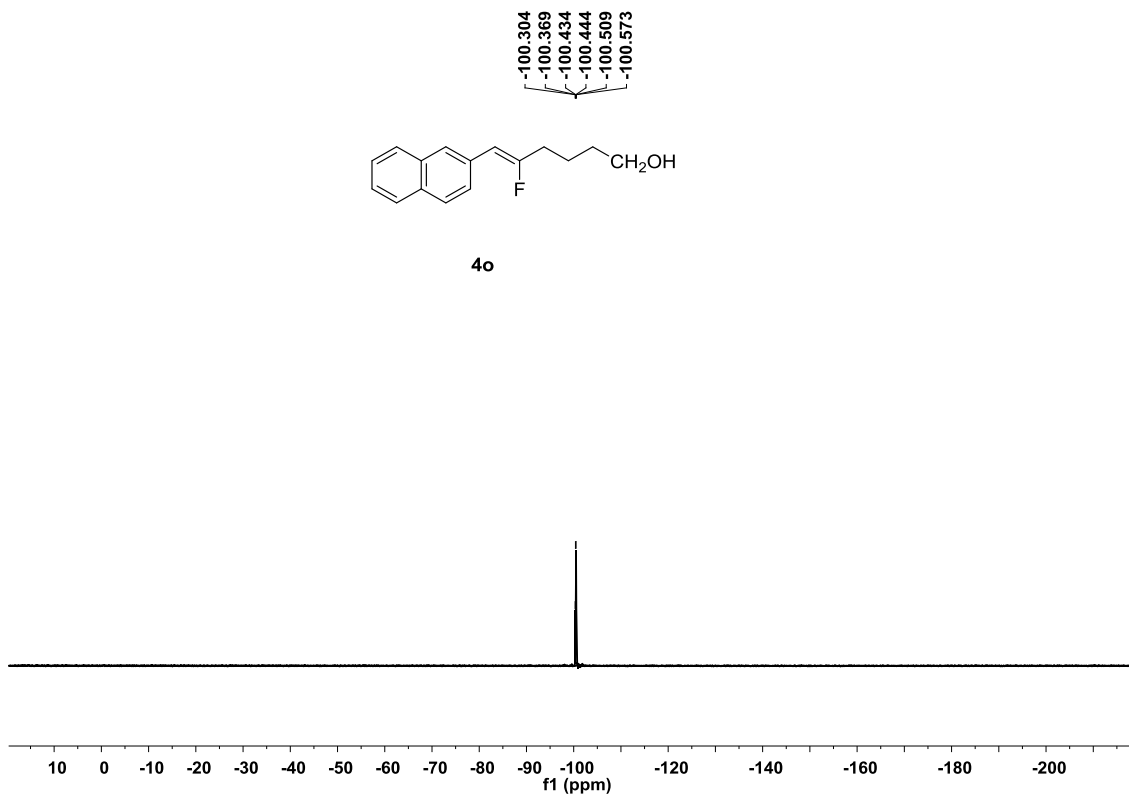

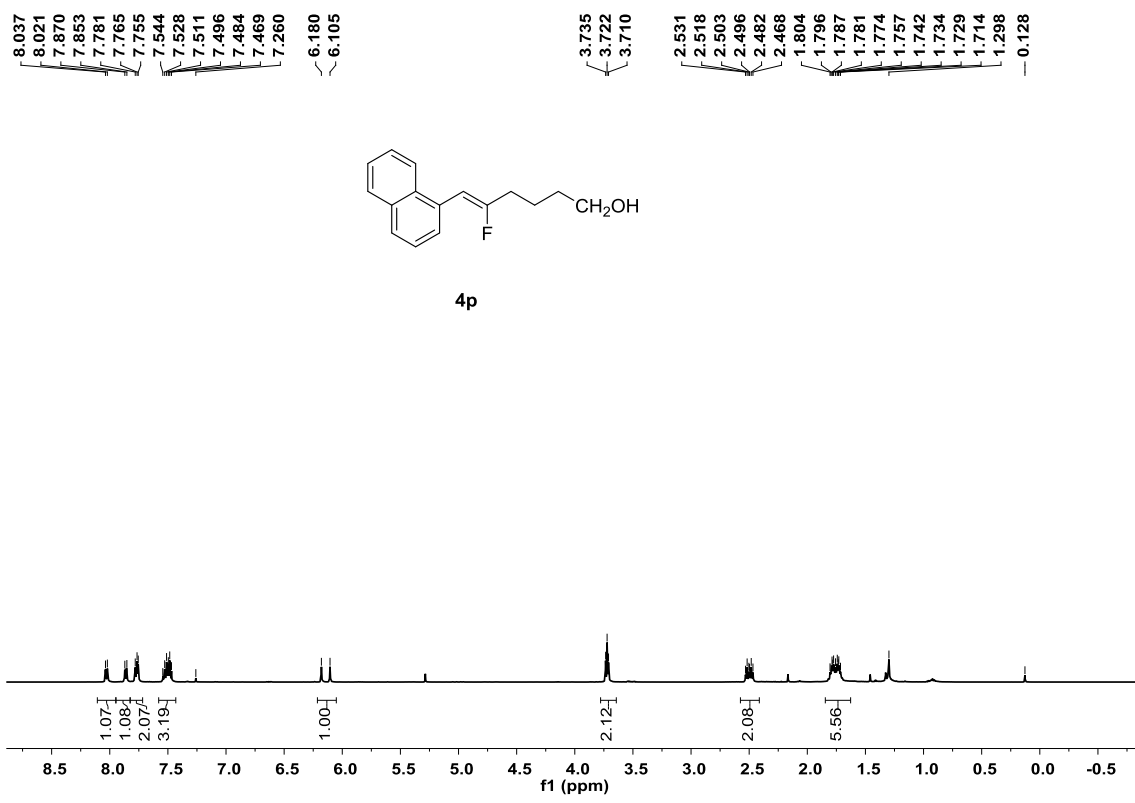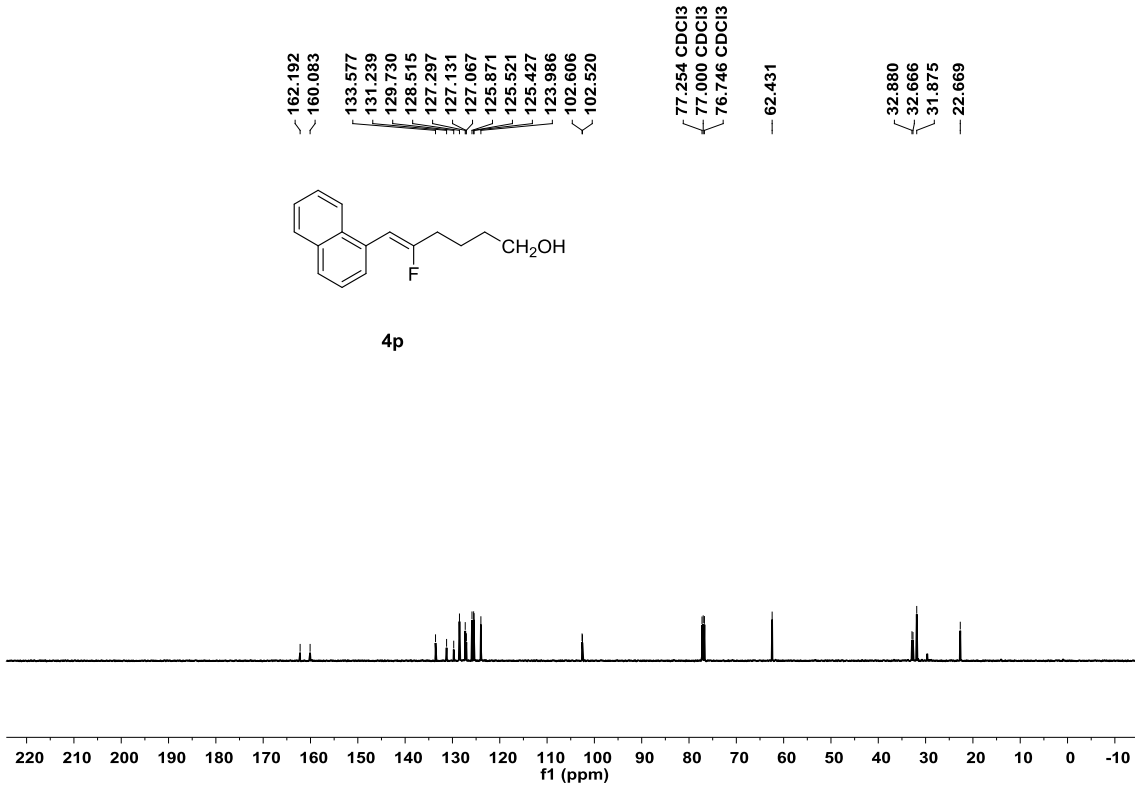

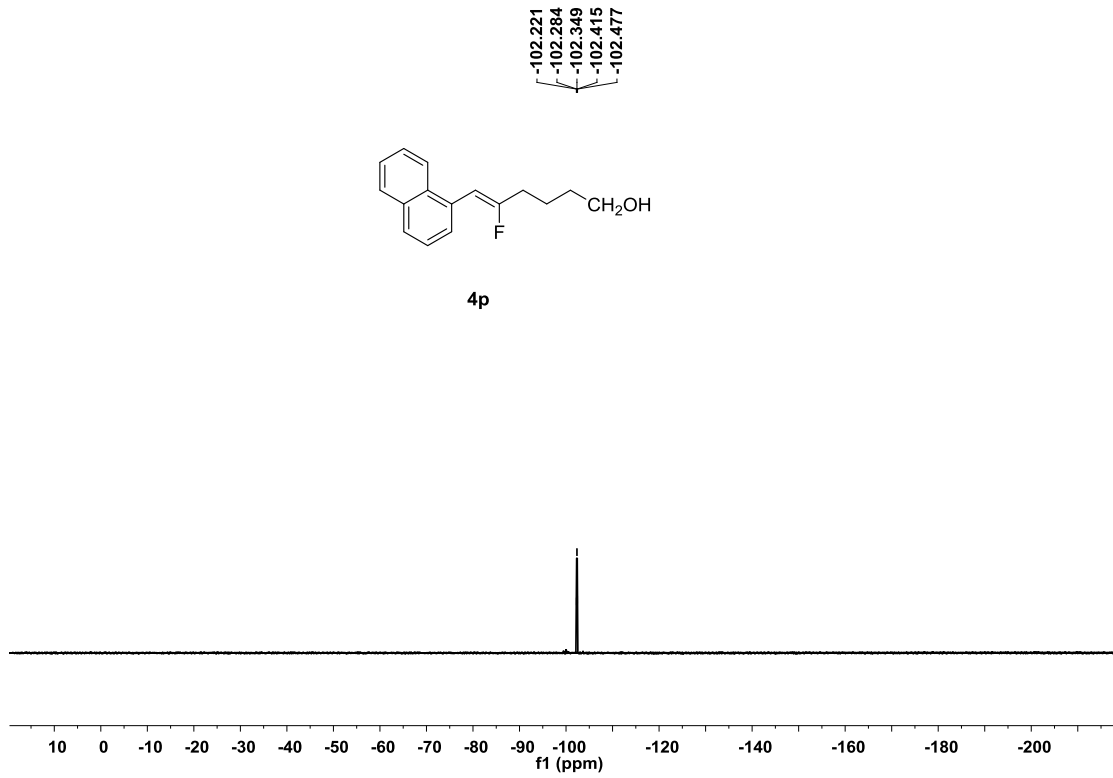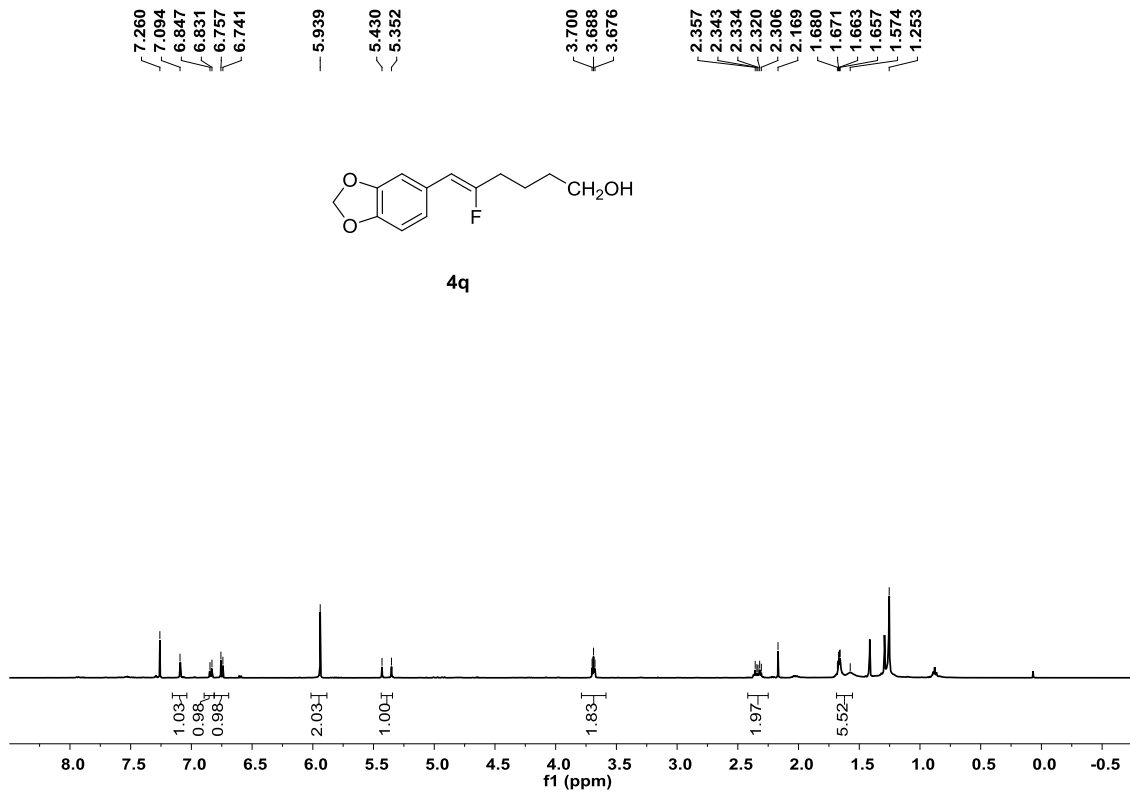

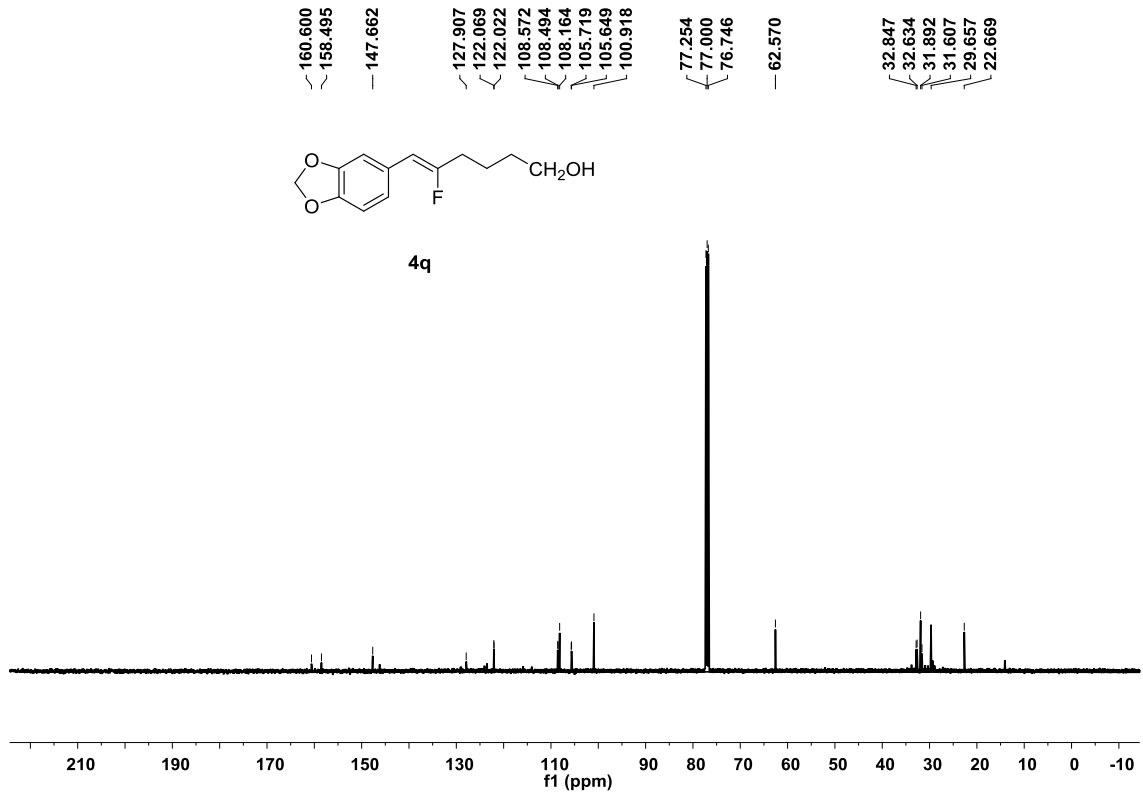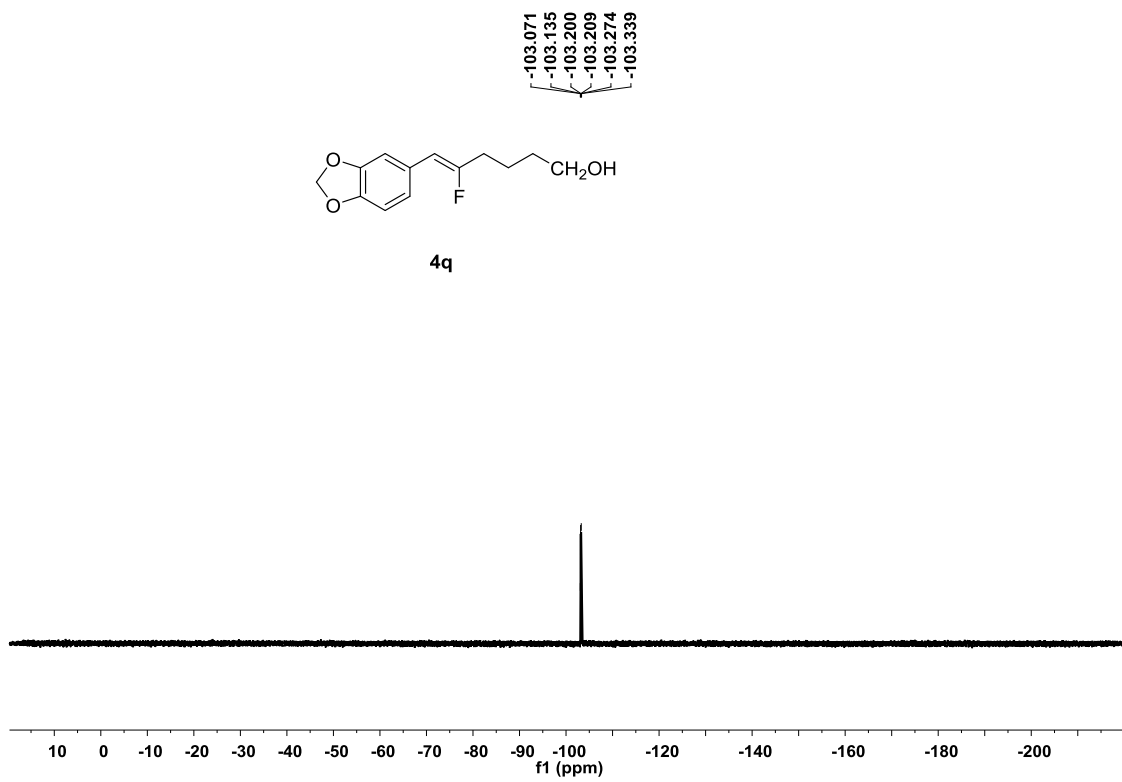

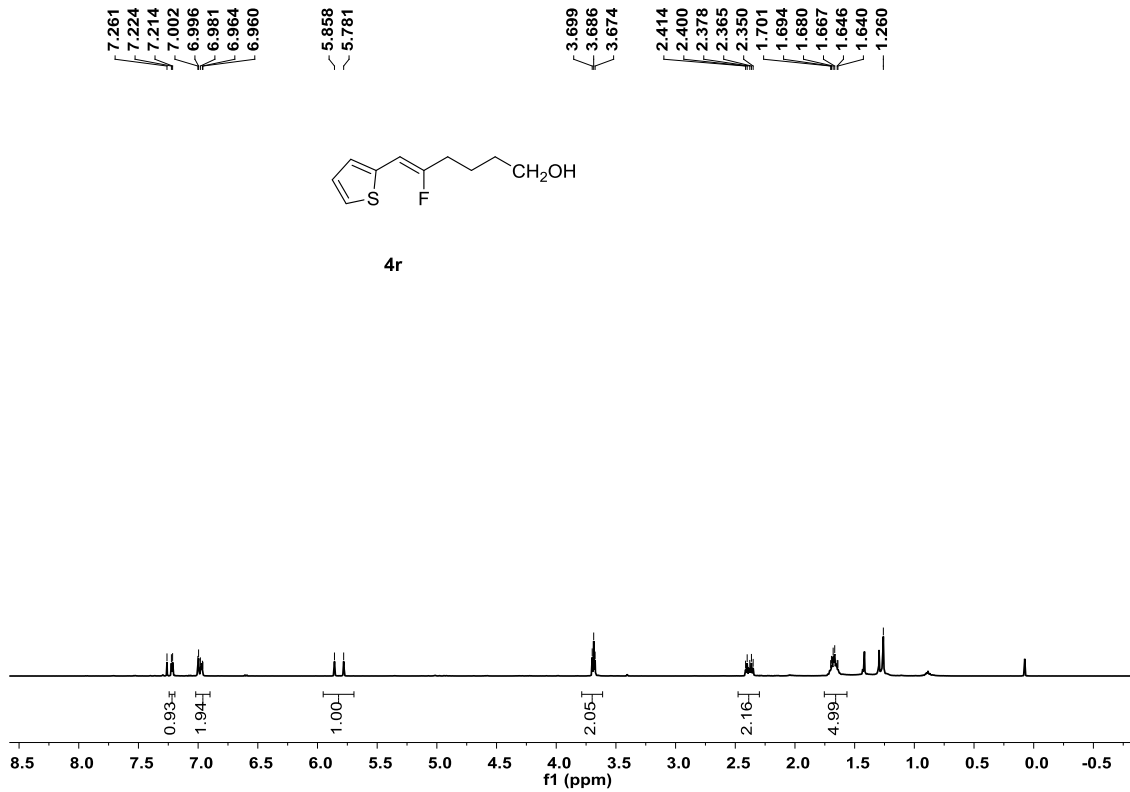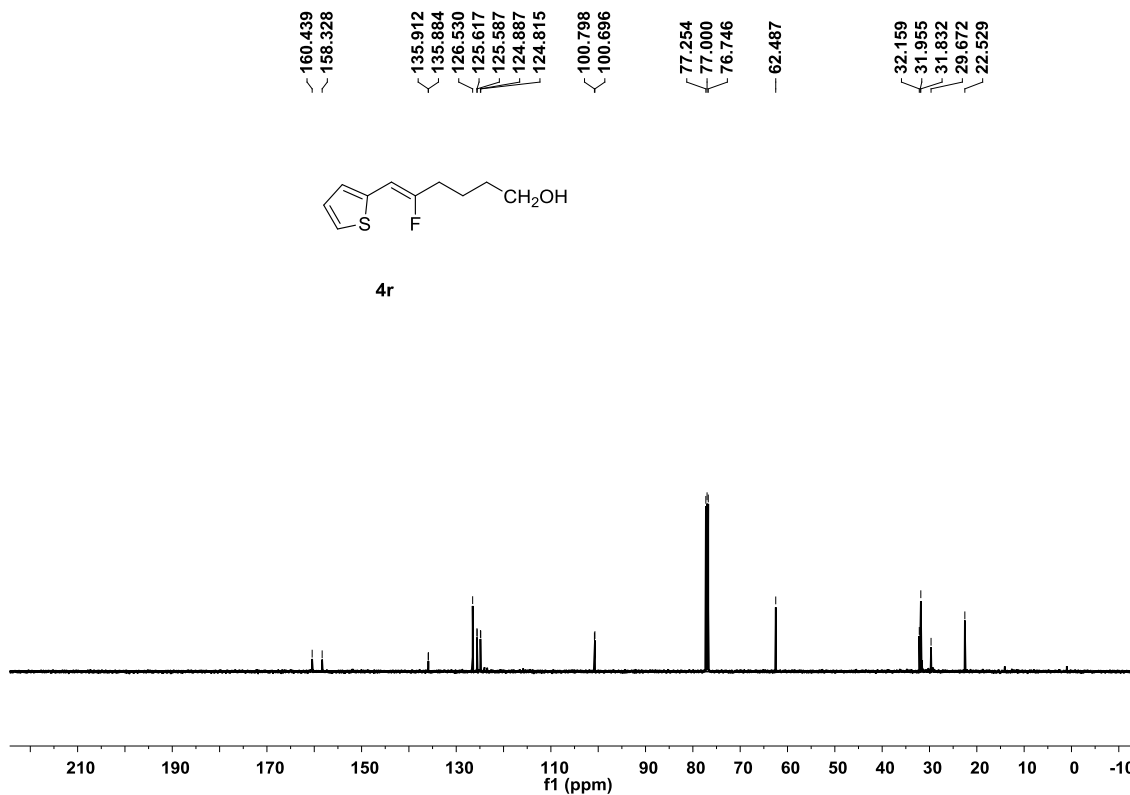



-97.791  
-97.797  
-97.854  
-97.860  
-97.918  
-97.925  
-97.933  
-97.991  
-97.996  
-98.054  
-98.060

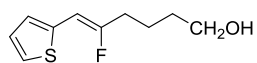

4r

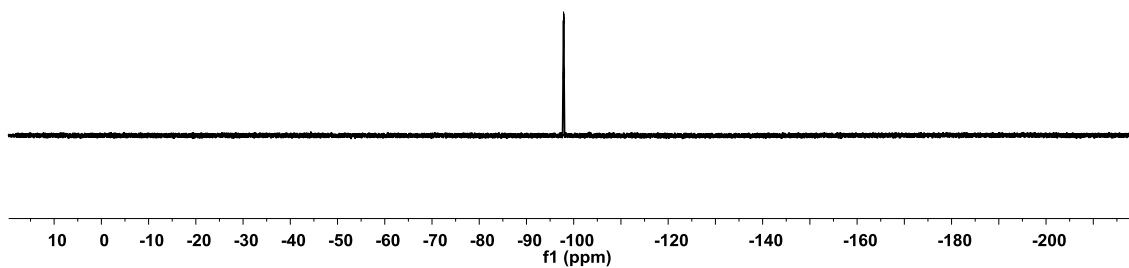

7.409  
7.394  
7.319  
7.304  
7.289  
7.261  
7.224  
7.209  
7.023  
7.013  
6.991  
6.459  
6.427

5.478  
5.456  
5.407  
5.386

3.699  
3.688  
3.676

2.337  
2.324  
2.315  
2.302  
2.288  
1.661  
1.655  
1.650  
1.643  
1.565

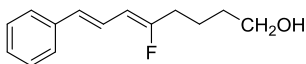

4s

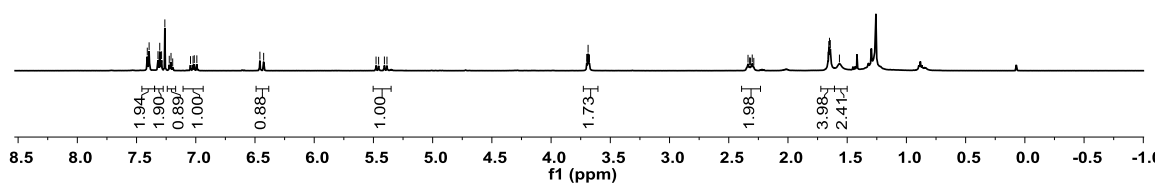

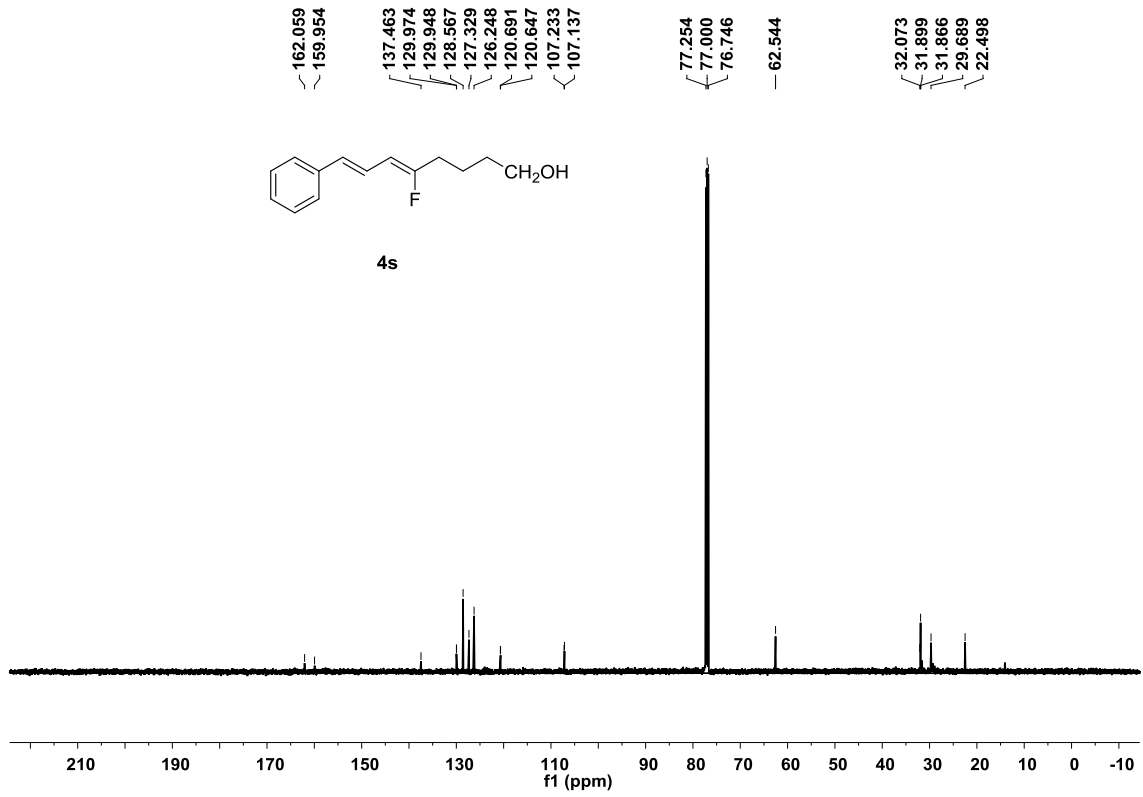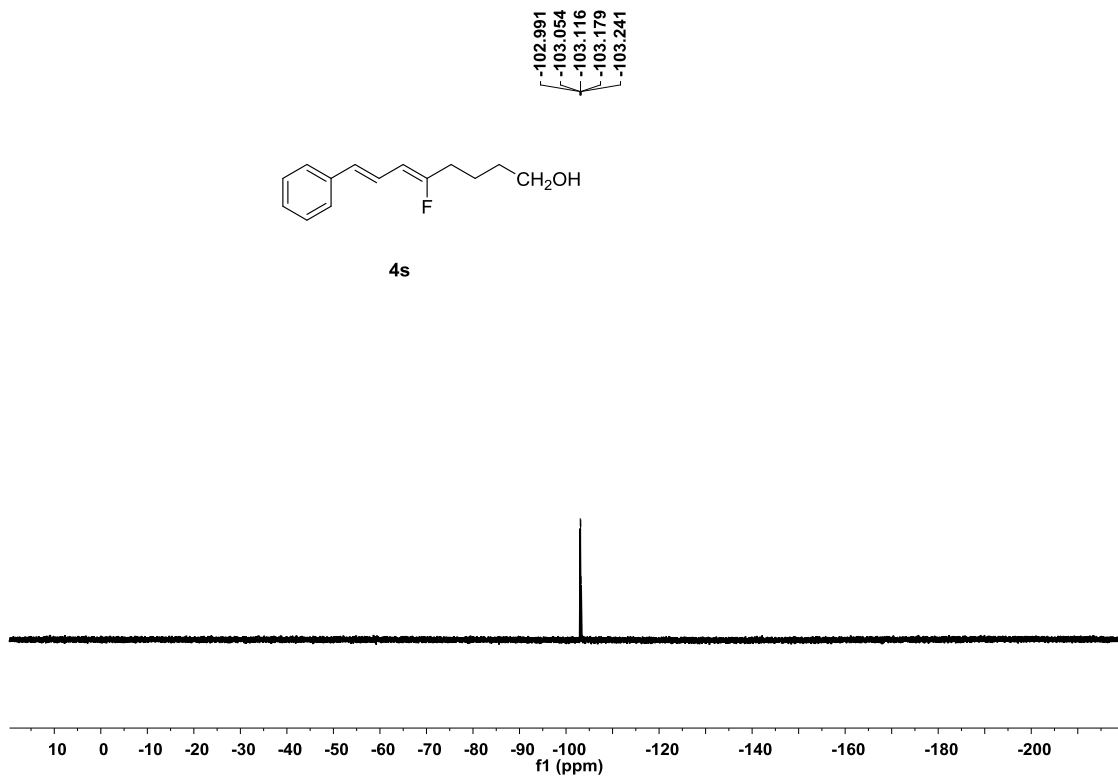

7.444  
7.436  
7.302  
7.296  
7.261

5.068  
5.001

3.691  
3.679

2.354  
2.340  
2.333  
2.320

1.655  
1.650  
1.644  
1.560  
1.257

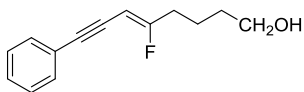

4t

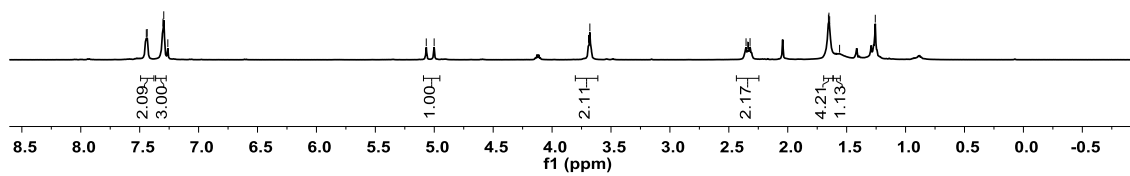

170.129  
167.966

131.416  
128.230  
128.089  
123.345

93.054  
93.009  
87.952  
87.835  
81.550  
77.255 CDC13  
77.000 CDC13  
76.746 CDC13  
62.368

31.997  
31.801  
31.727  
22.272

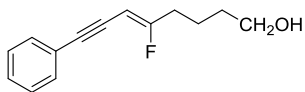

4t

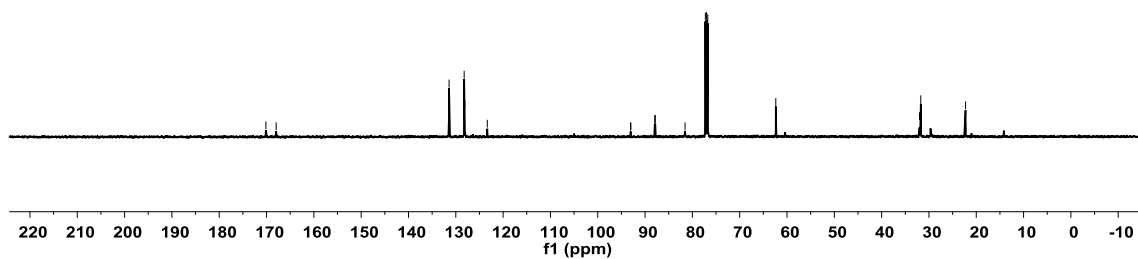

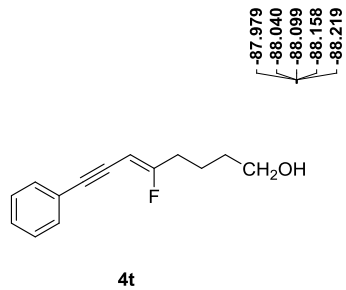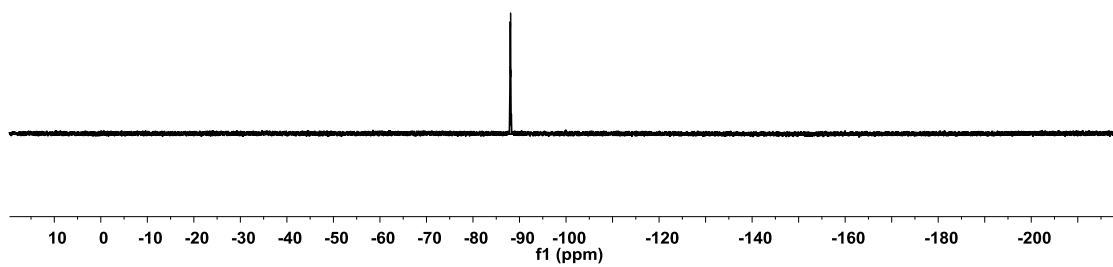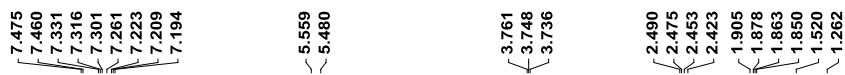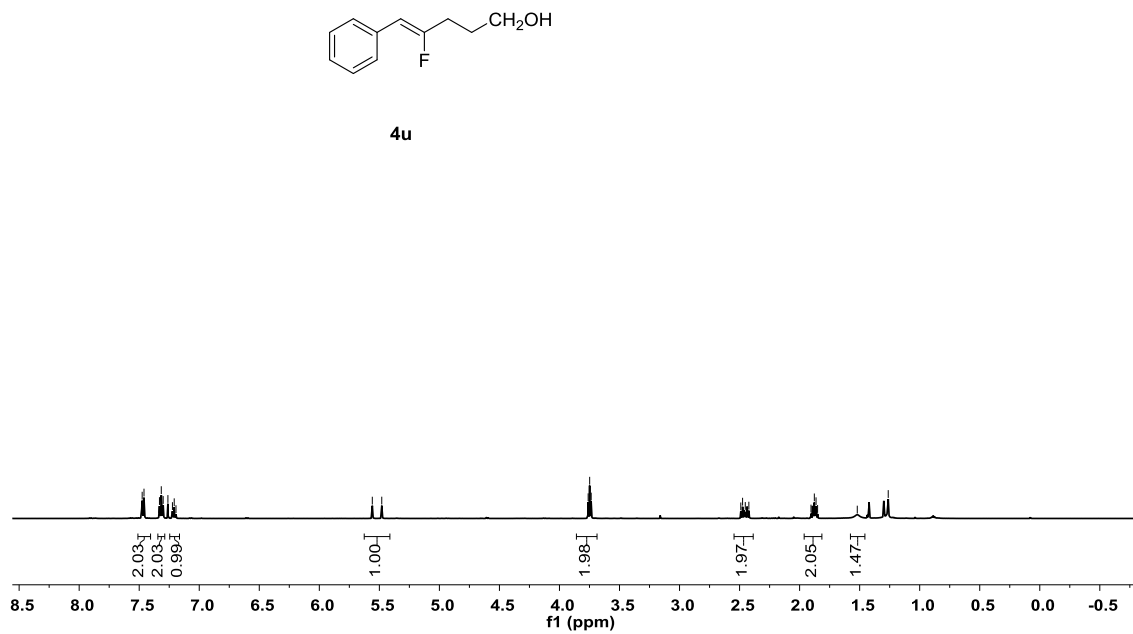

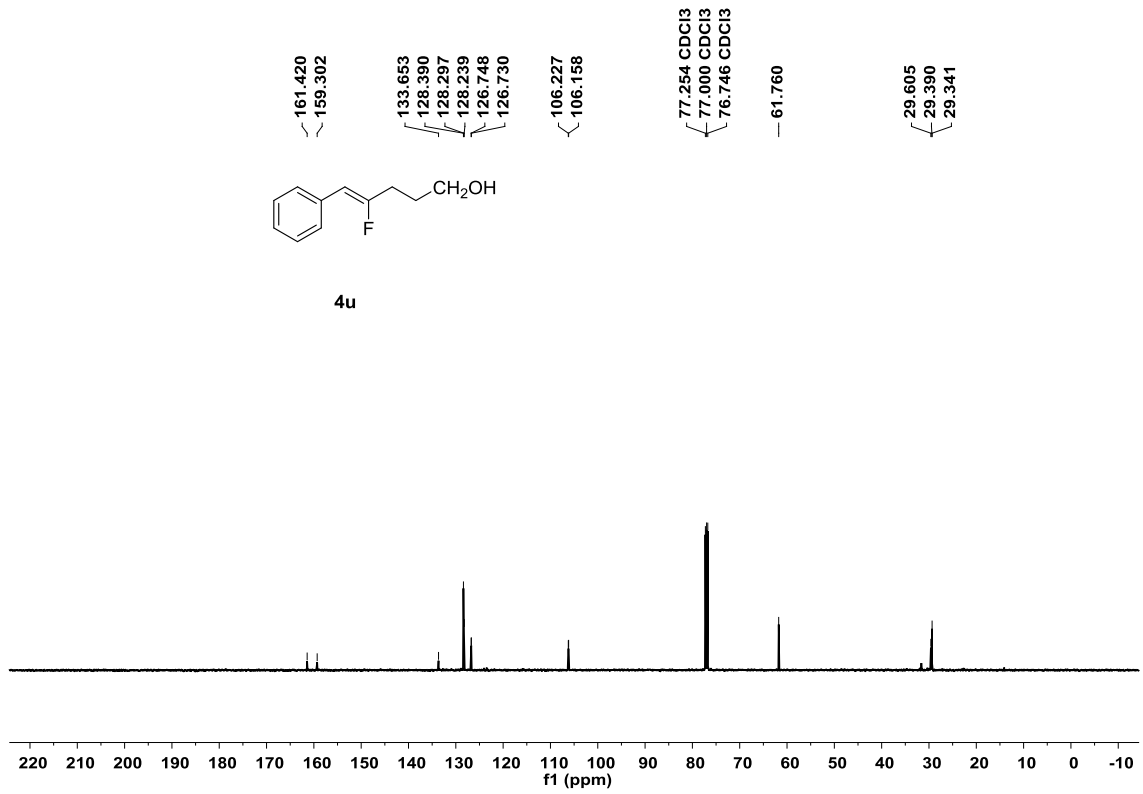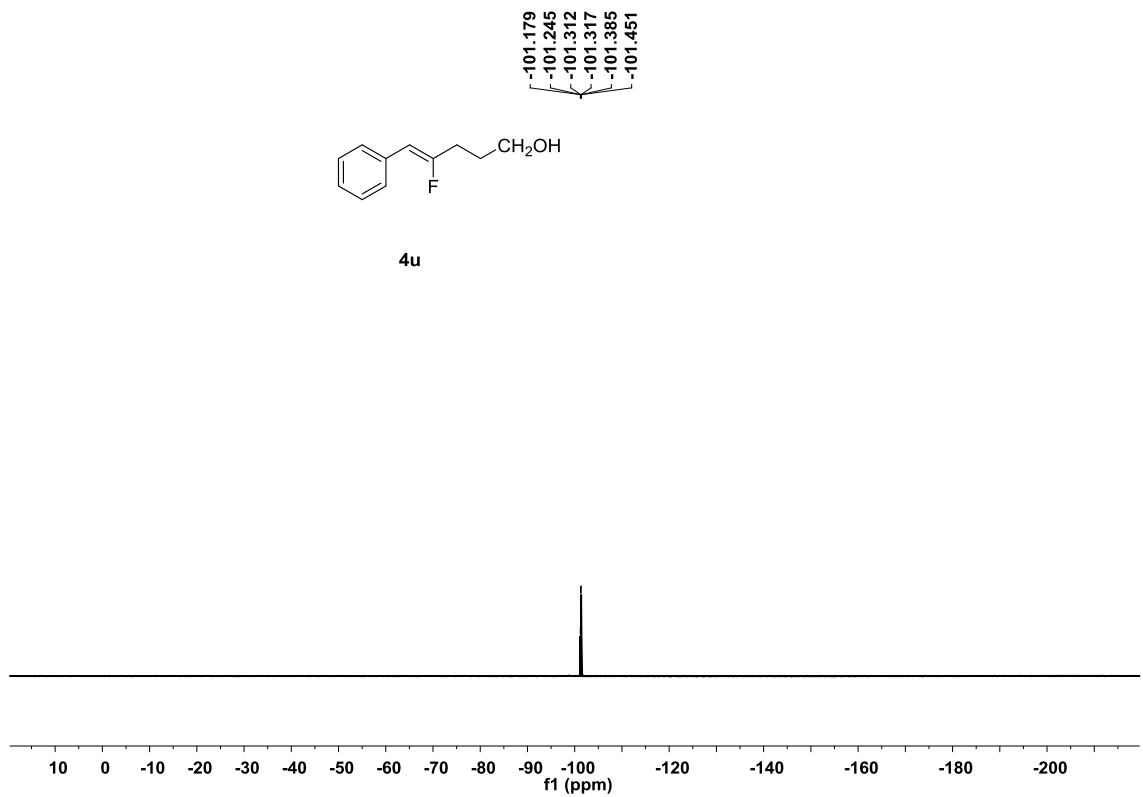

7.472  
7.457  
7.326  
7.311  
7.296  
7.260  
7.214  
7.200  
7.186

5.510  
5.431

3.677  
3.665  
3.652

2.380  
2.366  
2.345  
2.315  
1.661  
1.646  
1.621  
1.606  
1.478  
1.464  
1.420  
1.262

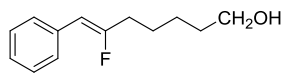

4v

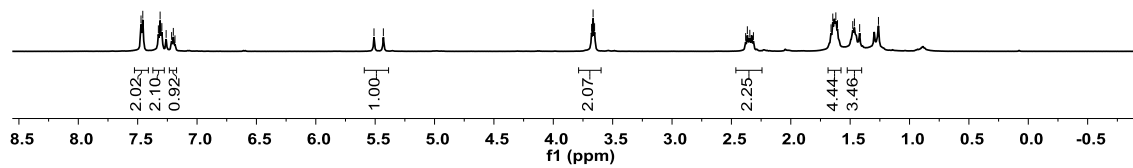

161.942  
159.822

133.808  
128.366  
128.261  
128.202  
126.628  
126.612

105.887  
105.818

77.254 CDCl3  
77.000 CDCl3  
76.746 CDCl3

62.779

33.136  
32.924  
32.433  
26.157  
25.088

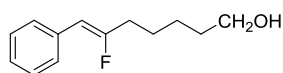

4v

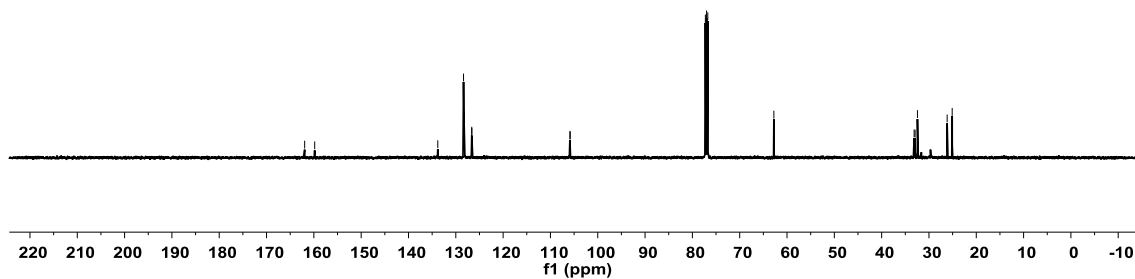

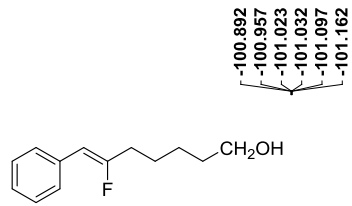

4v

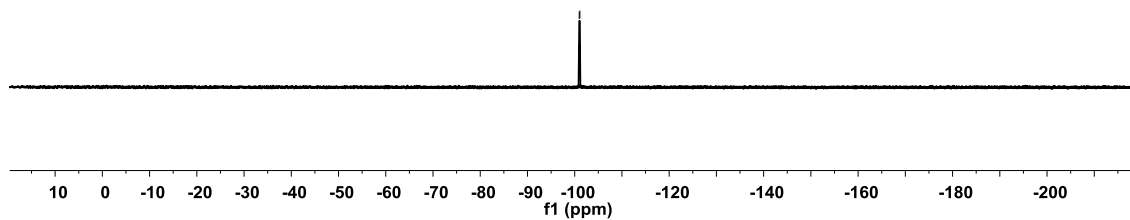

7.470  
7.455  
7.325  
7.310  
7.294  
7.261  
7.212  
7.197  
7.183

5.502  
5.423

3.667  
3.654  
3.641

2.351  
2.336  
2.314  
1.637  
1.623  
1.592  
1.579  
1.424  
1.418  
1.410  
1.260

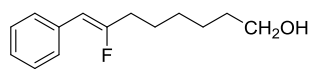

4w

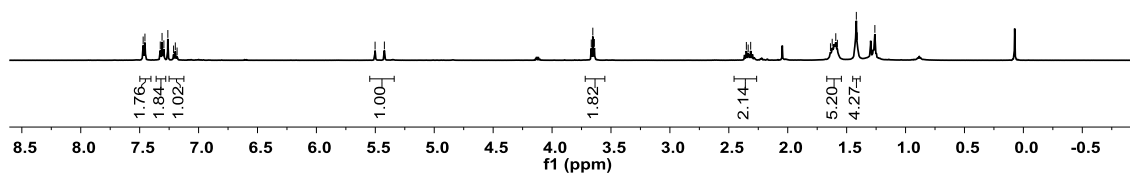

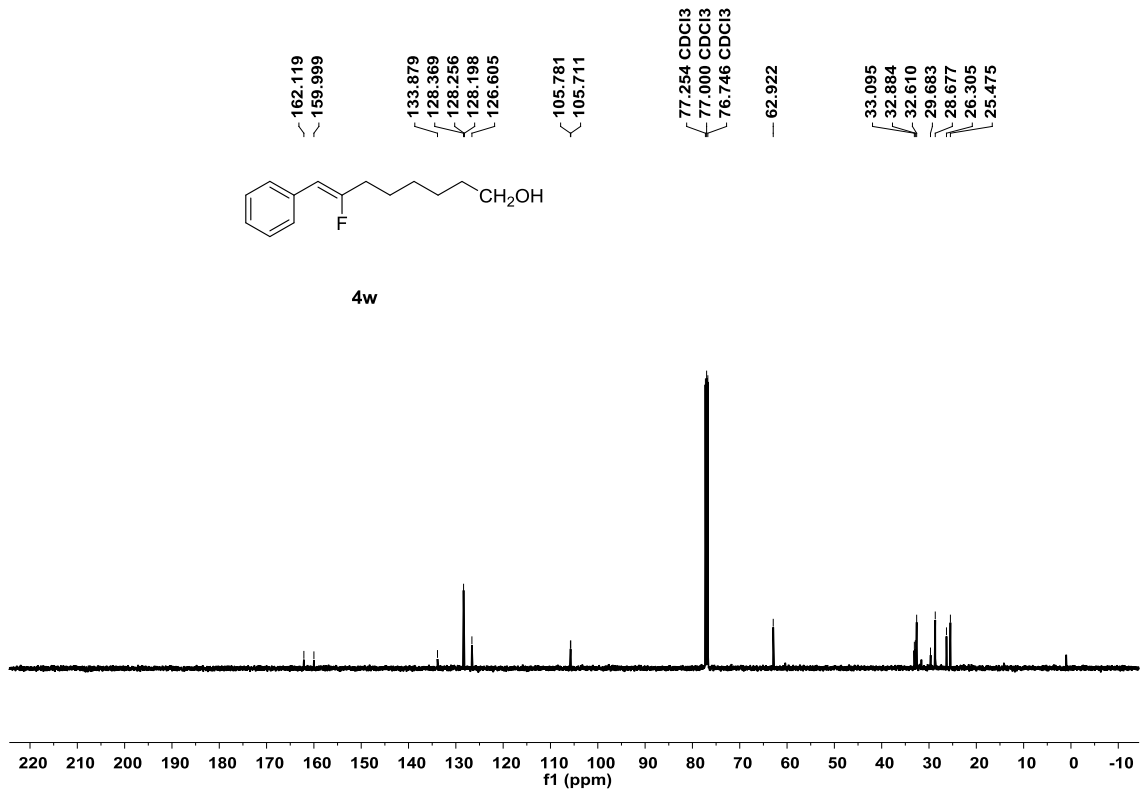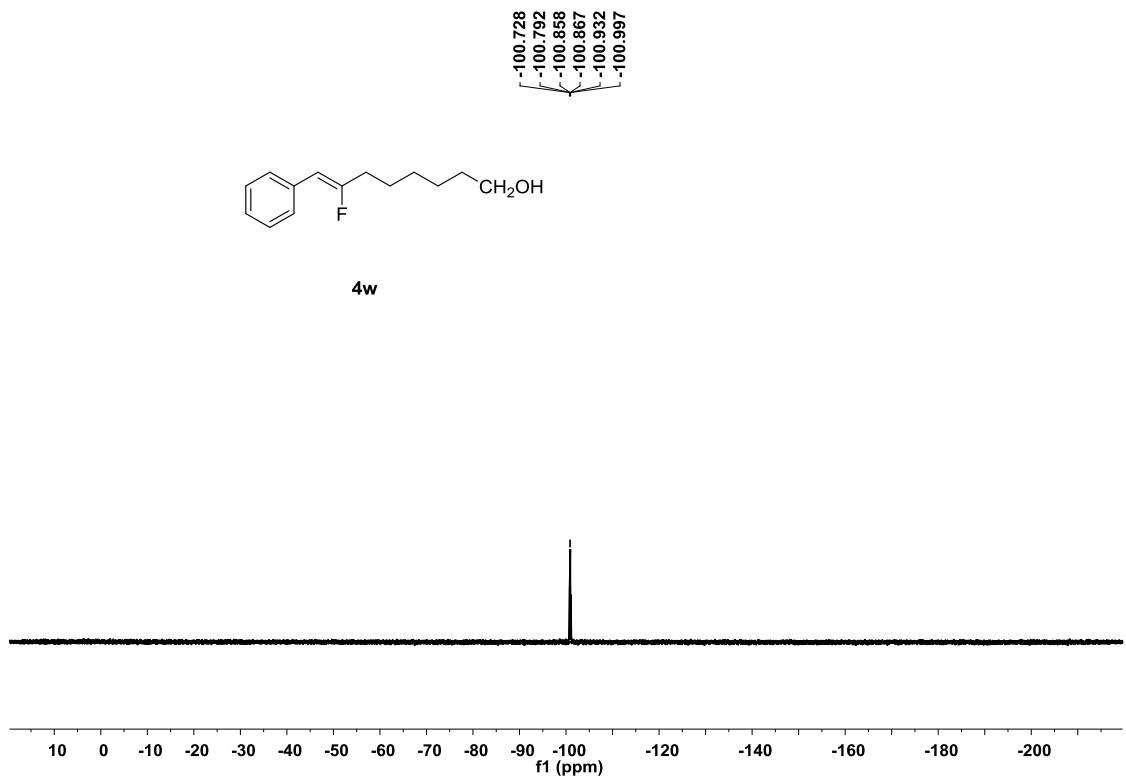



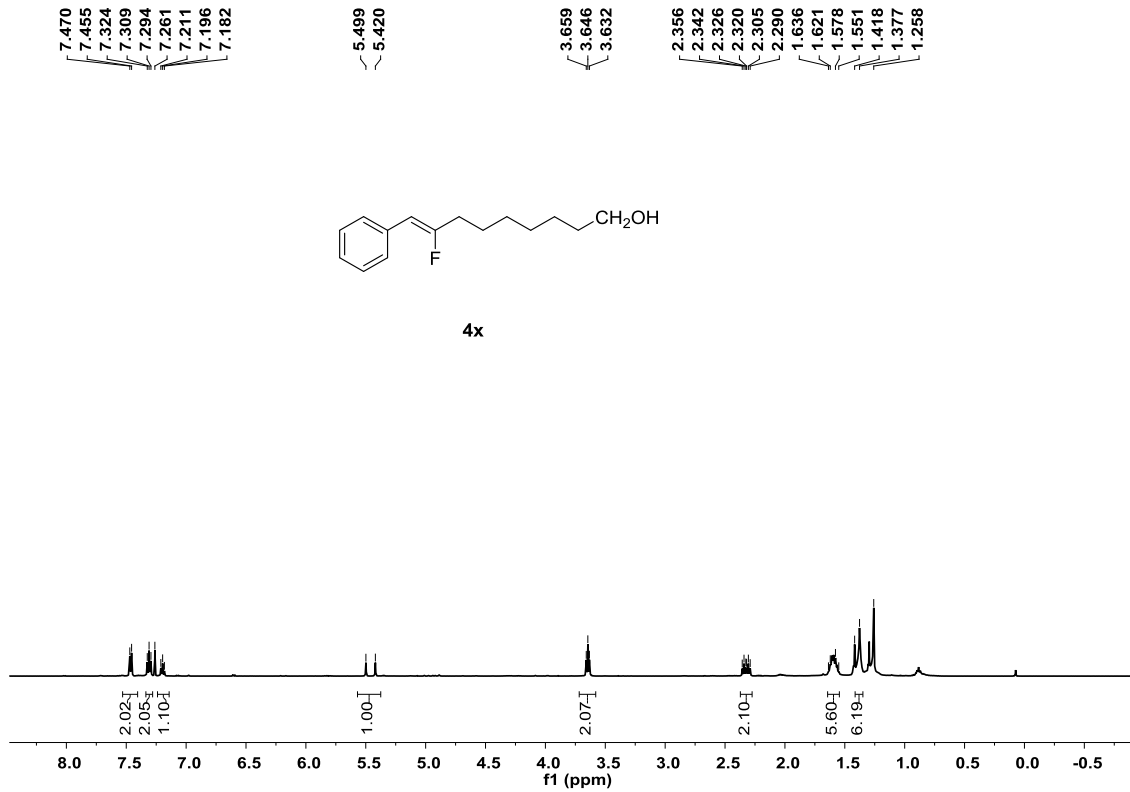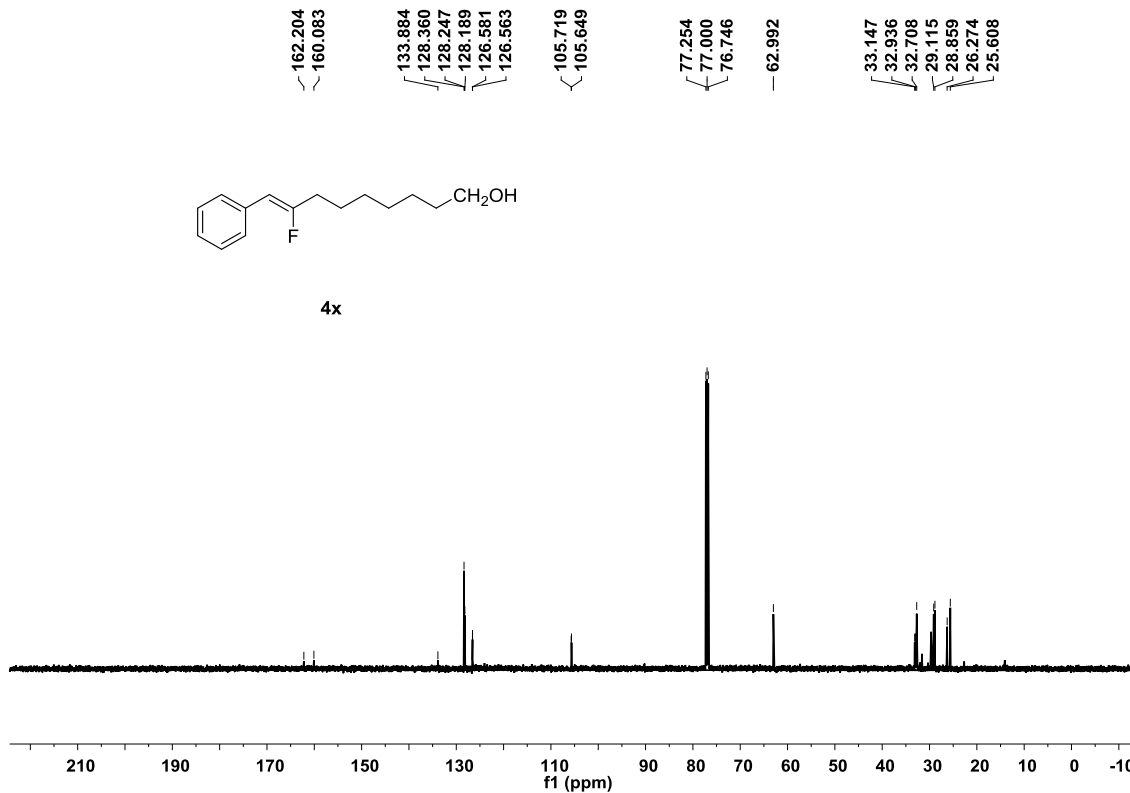

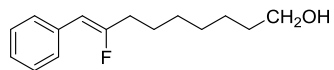

4x

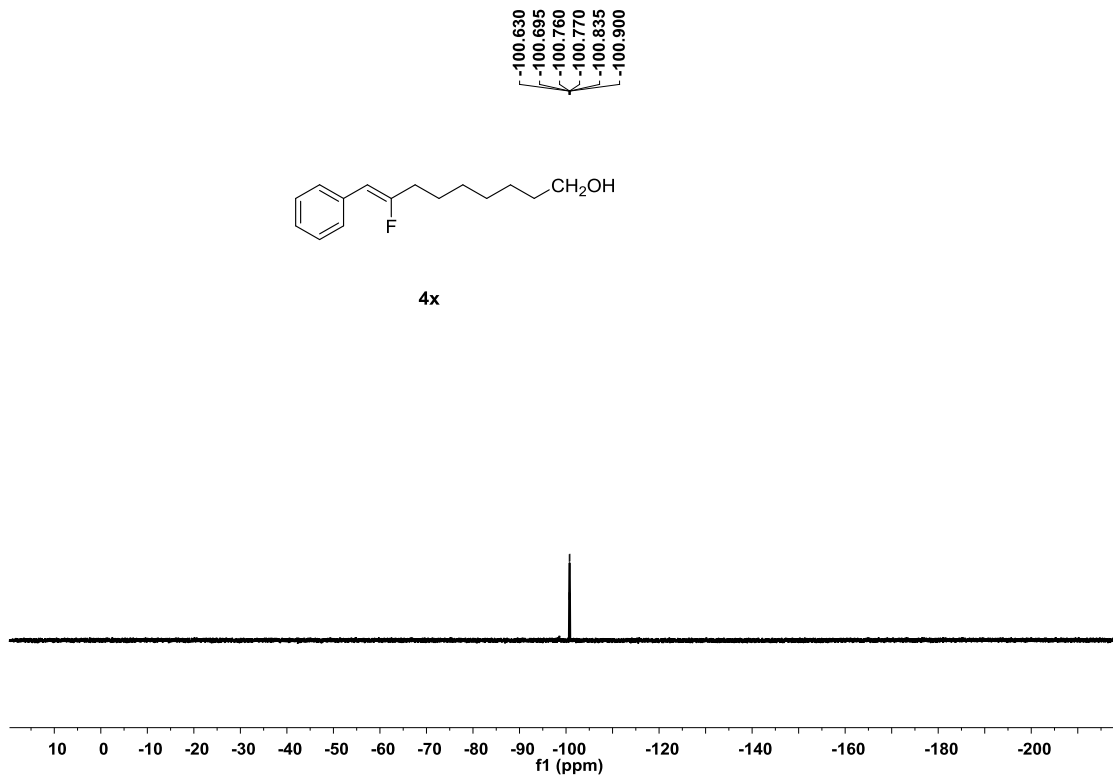

100317.26  
1H AMX  
TL-4-49

5.528  
5.449  
3.566  
3.554  
3.545  
3.542  
3.533  
3.530  
3.522  
3.510  
3.500  
3.507  
3.501  
3.489  
2.488  
2.479  
2.459  
2.415  
2.403  
2.396  
2.384  
2.384  
2.377  
2.370  
2.398  
2.398  
2.391  
2.386  
2.340  
2.333  
2.328  
2.320  
1.785  
1.778  
1.773  
1.765  
1.751  
1.751  
1.740  
1.727  
1.541  
1.490  
1.469  
1.455  
1.451  
1.444  
1.440  
1.433  
1.428  
1.425  
1.414  
1.414  
1.395  
1.386  
1.256  
0.889  
0.876  
0.872

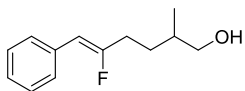

4y

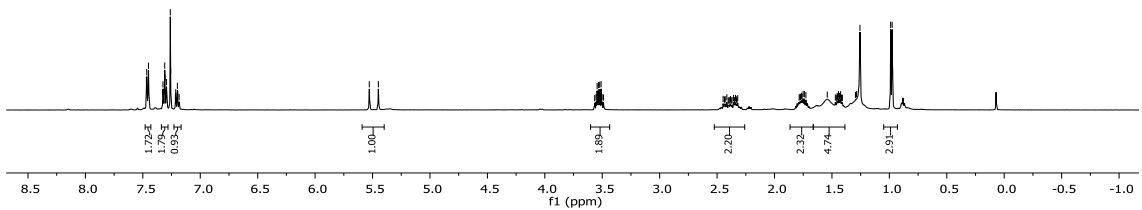

H0317.8.fid  
13C AMX500  
TL-4-49

162.039  
159.921  
133.804  
133.784  
133.764  
128.275  
128.217  
126.657  
126.639  
105.847  
105.777  
77.247  
76.993  
76.740  
67.960  
35.114  
30.581  
29.775  
28.692  
16.366

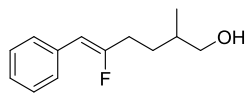

4y

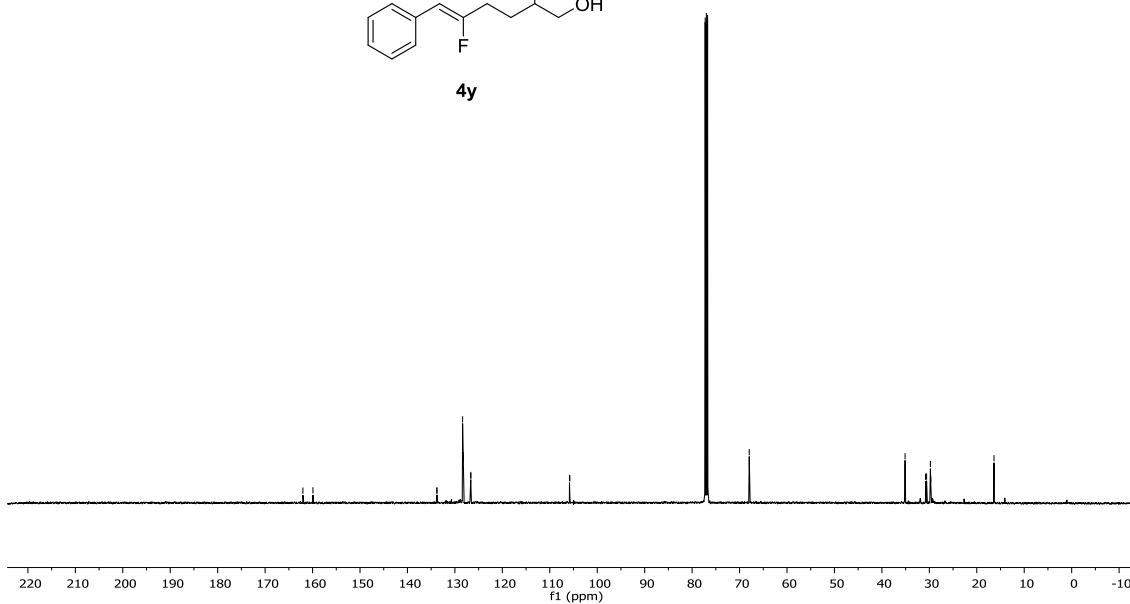

Mar18tl.2.fid  
tl-4-49

100.808  
100.855  
100.803  
100.844  
100.860  
101.008

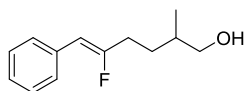

4y

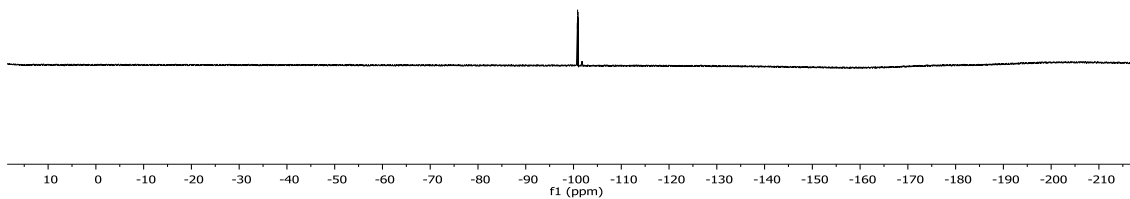

h0317.5.fid  
1H AMX500  
TL-4-50

7.483  
7.485  
7.482  
7.467  
7.333  
7.333  
7.303  
7.303  
7.302  
7.300  
7.235  
7.235  
7.208  
7.208  
7.195  
7.192  
5.524  
5.445  
3.764  
3.762  
3.757  
3.751  
3.746  
3.743  
3.741  
3.731  
3.719  
3.712  
3.695  
3.688  
2.383  
2.367  
2.355  
2.354  
2.348  
2.338  
2.335  
2.227  
2.222  
2.182  
2.179  
2.137  
2.046  
2.043  
2.000  
1.995  
1.985  
1.983  
1.790  
1.737  
1.723  
1.720  
1.700  
1.690  
1.483  
1.479  
1.465  
1.451  
1.445  
1.420  
1.406  
1.406  
1.002

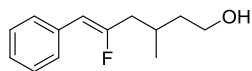

4z

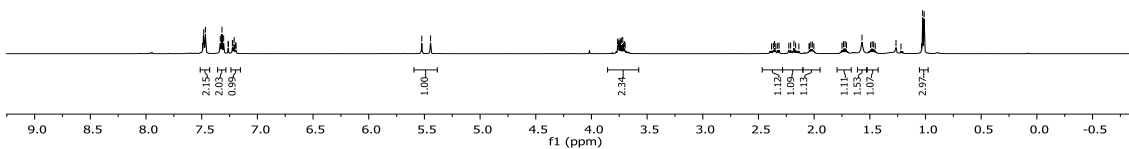

h0317.6.fid  
13C AMX500  
TL-4-50

160.84  
158.72  
133.73  
133.71  
128.49  
128.35  
128.27  
128.24  
126.66  
126.66  
107.35  
107.28  
77.25  
76.99  
76.74  
60.87  
40.85  
40.65  
39.22  
27.98  
19.40

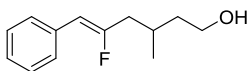

4z

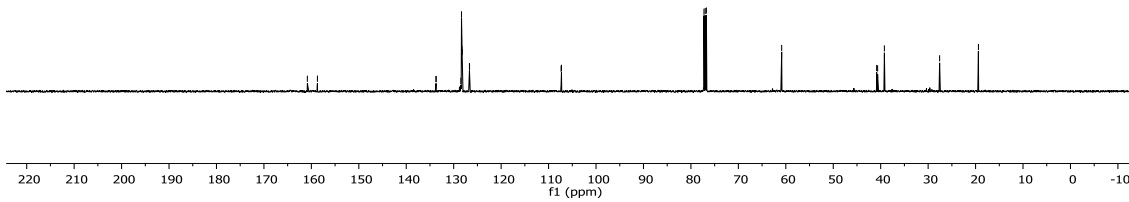

Mar18tl.4.fid  
tl-4-50

99.99  
100.04  
100.06  
100.08  
100.10  
100.14  
100.15  
100.20

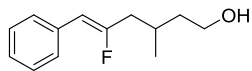

4z

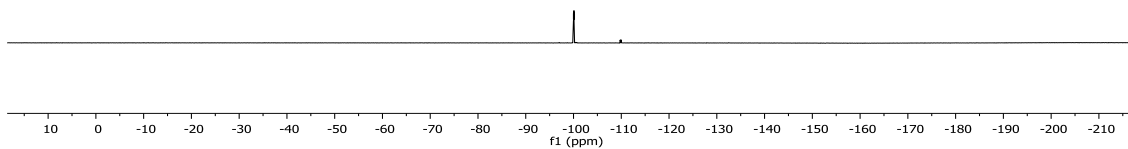

7.405  
7.261

5.496  
5.416

3.704  
3.692  
3.680

2.384  
2.370  
2.348

1.704  
1.683  
1.676  
1.648

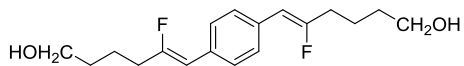

6

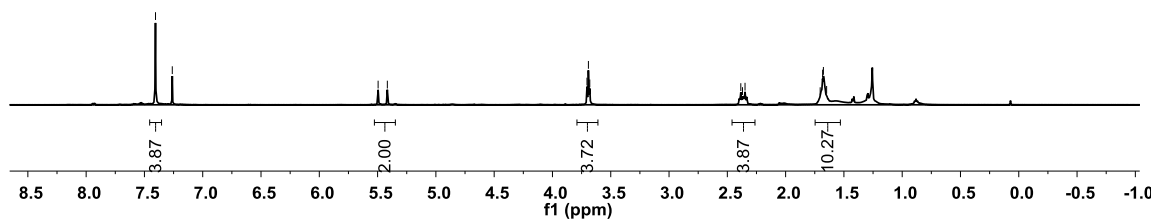

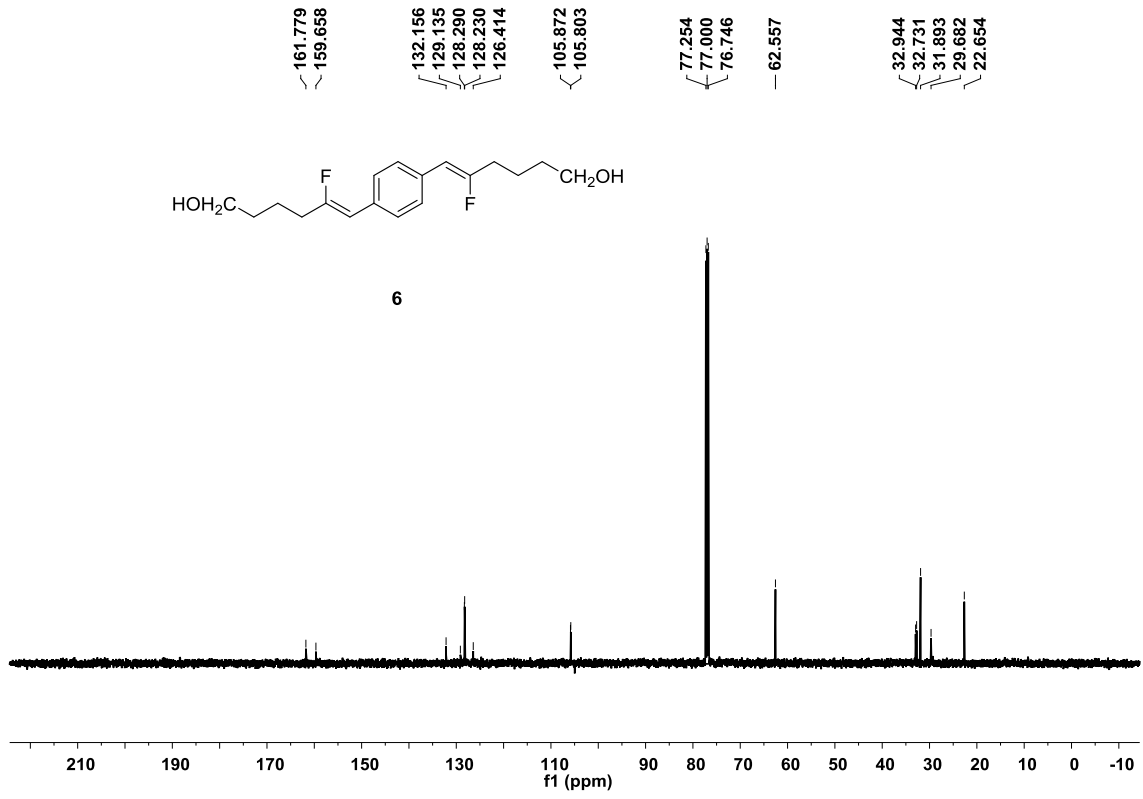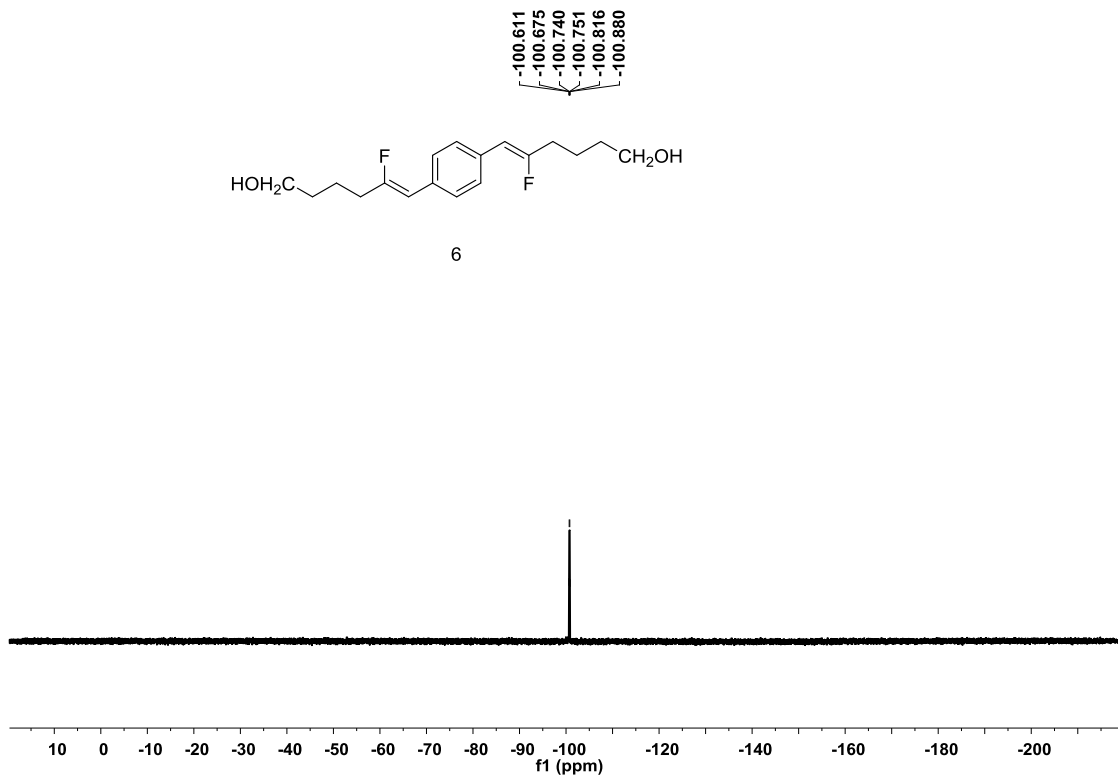

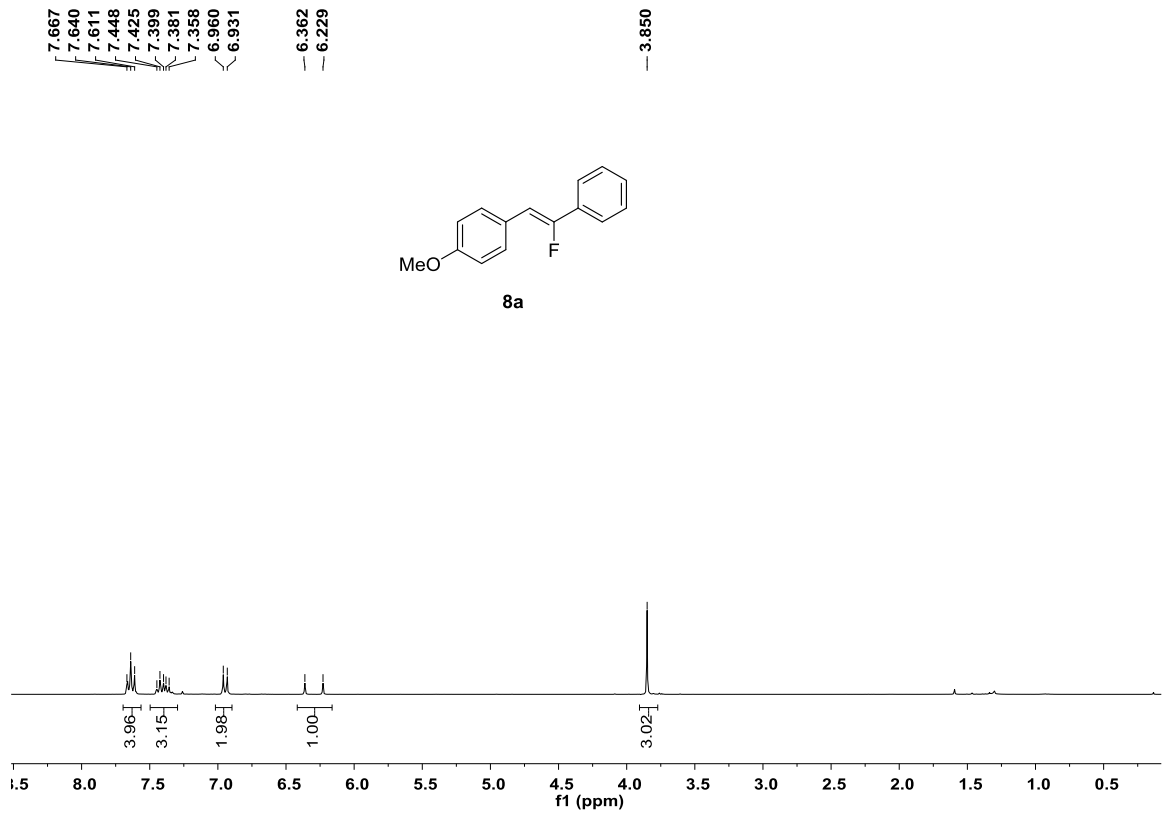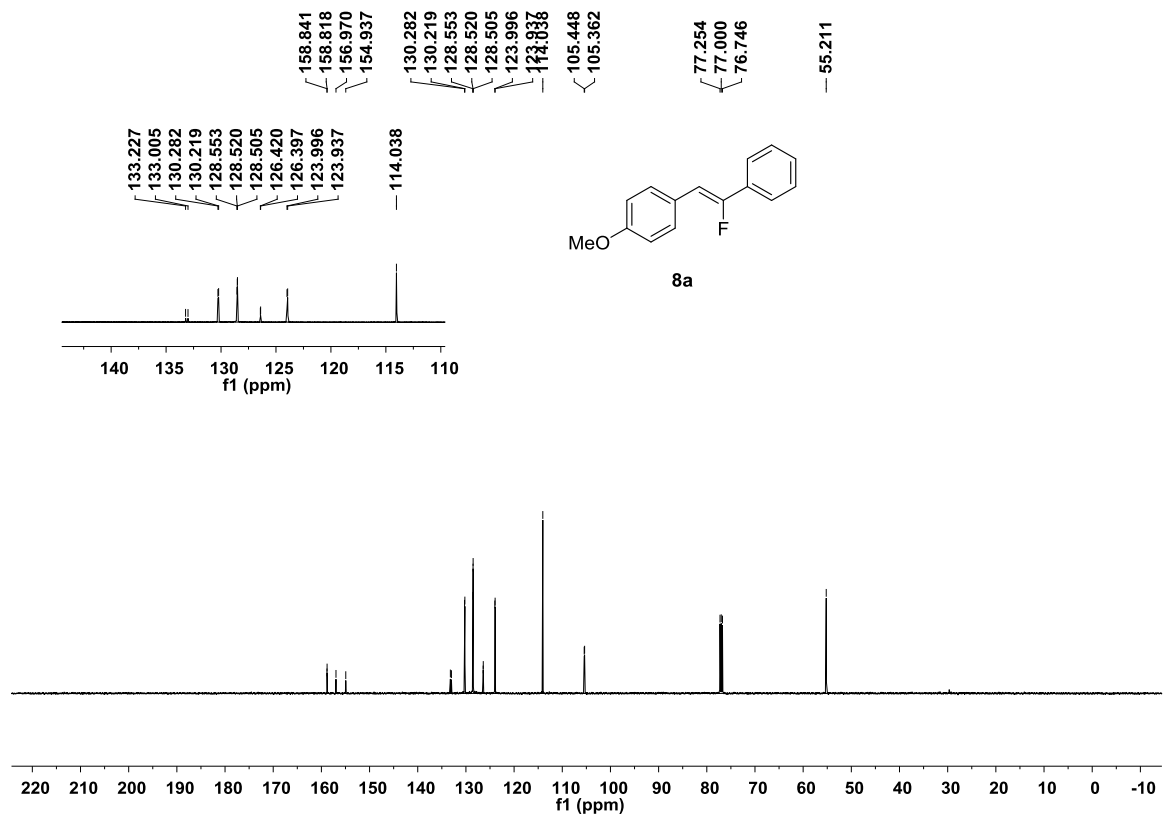

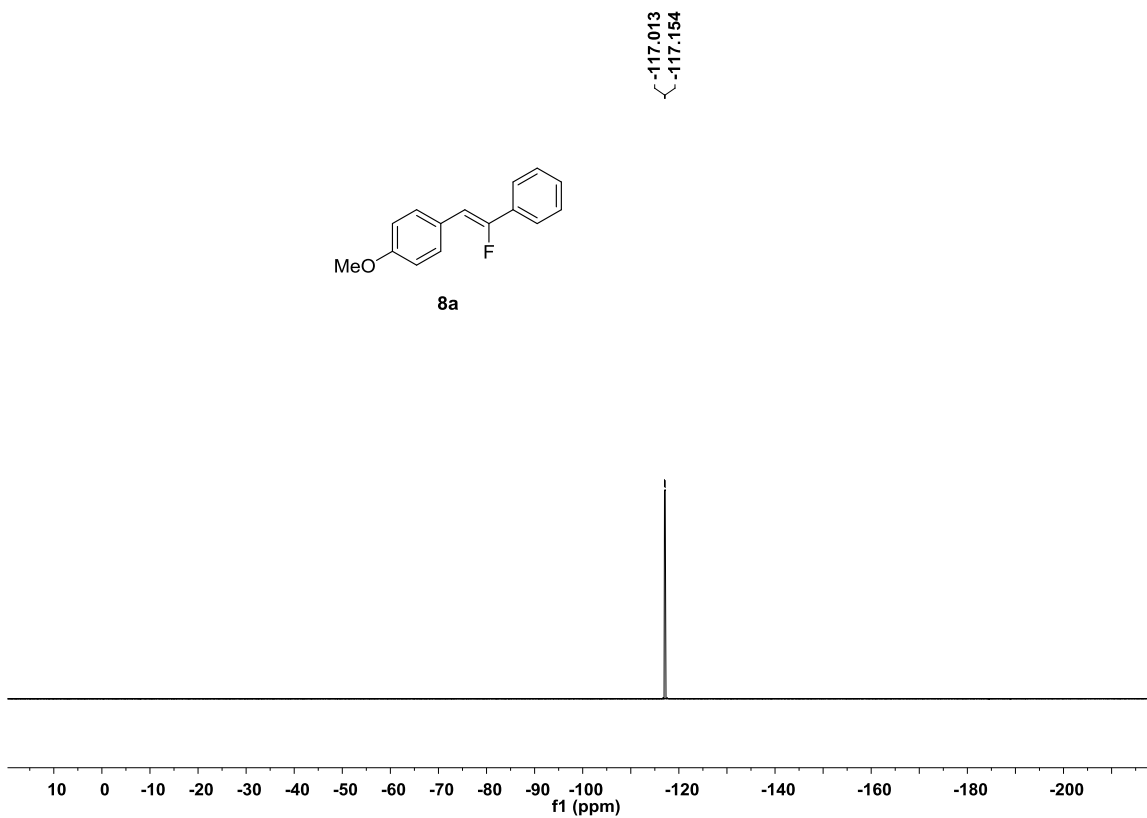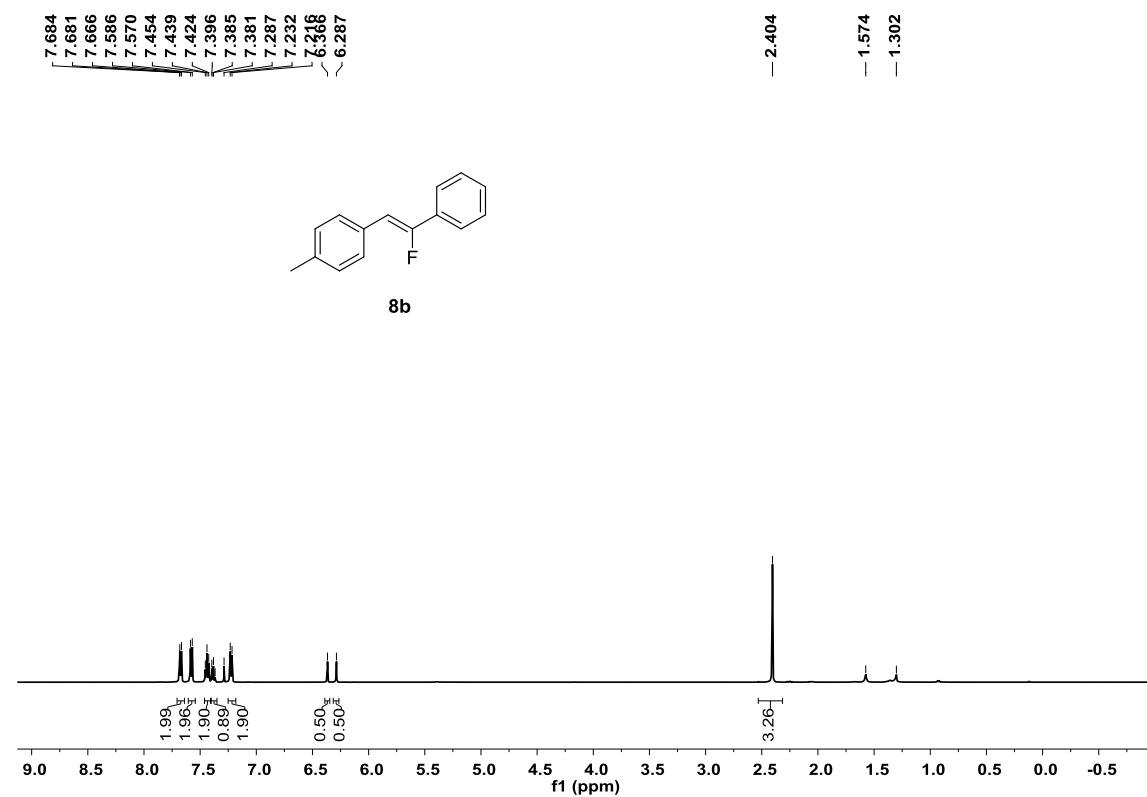



157.736  
155.690  
137.224  
129.294  
128.901  
128.838  
128.770  
128.557  
128.541  
124.204  
105.769  
105.655

77.255  
77.001  
76.747

21.258

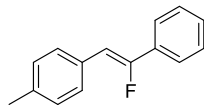

8b

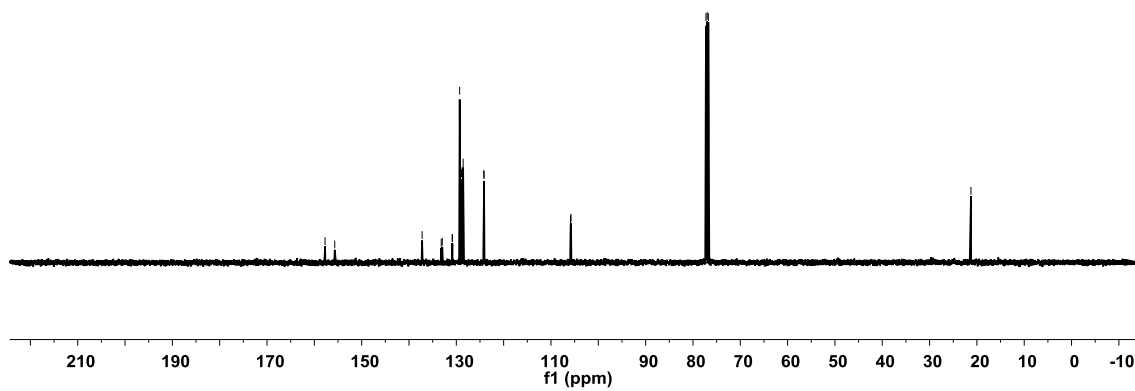

115.104  
115.245

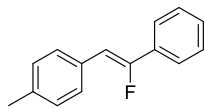

8b

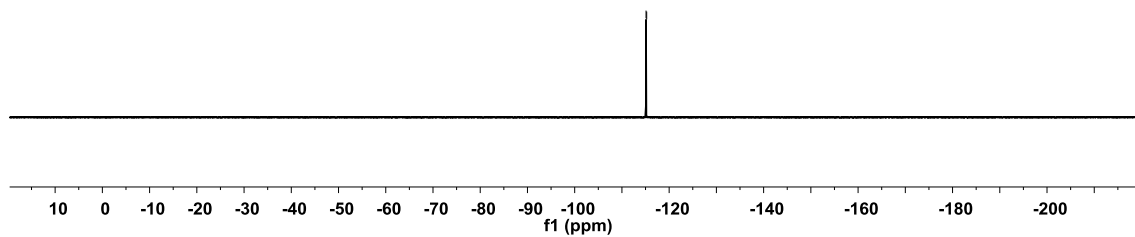

7.666  
7.658  
7.652  
7.644  
7.436  
7.421  
7.385  
7.354  
7.287  
7.272  
7.260  
6.364  
6.285

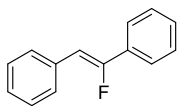

8c

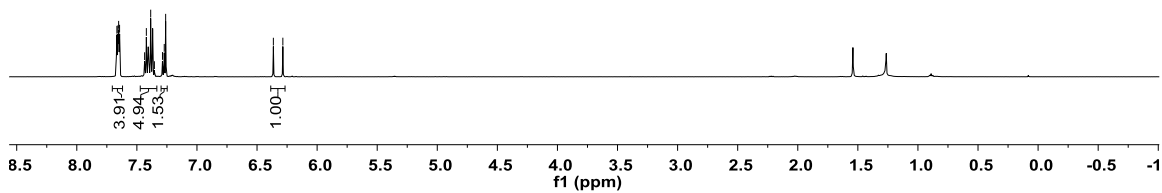

158.234  
156.178  
133.689  
133.664  
133.003  
132.782  
128.989  
128.969  
128.906  
128.592  
128.571  
127.324  
127.304  
124.326  
124.267  
105.896  
105.812  
77.254  
77.000  
76.746

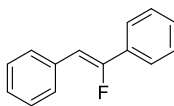

8c

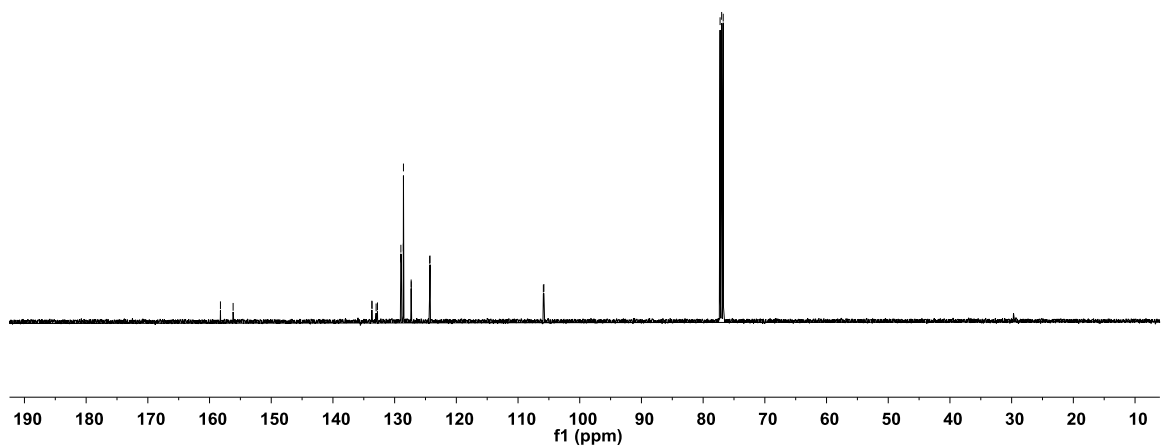

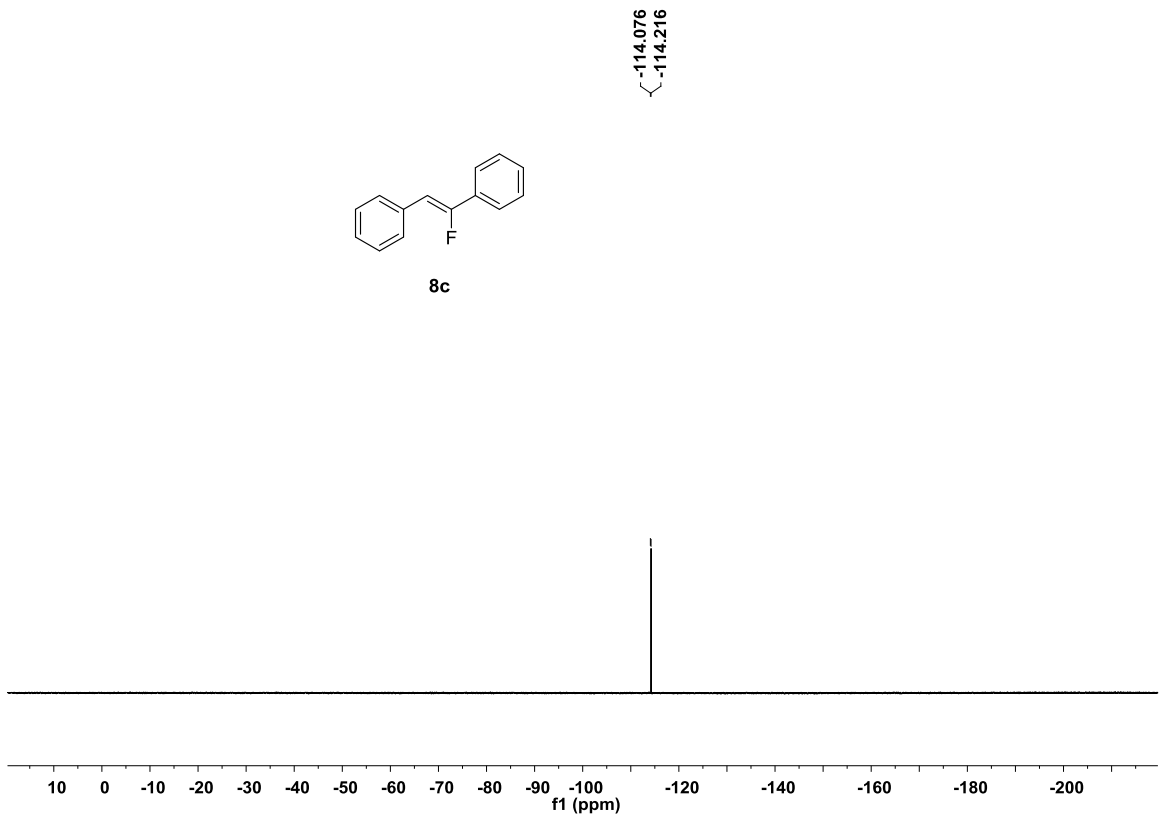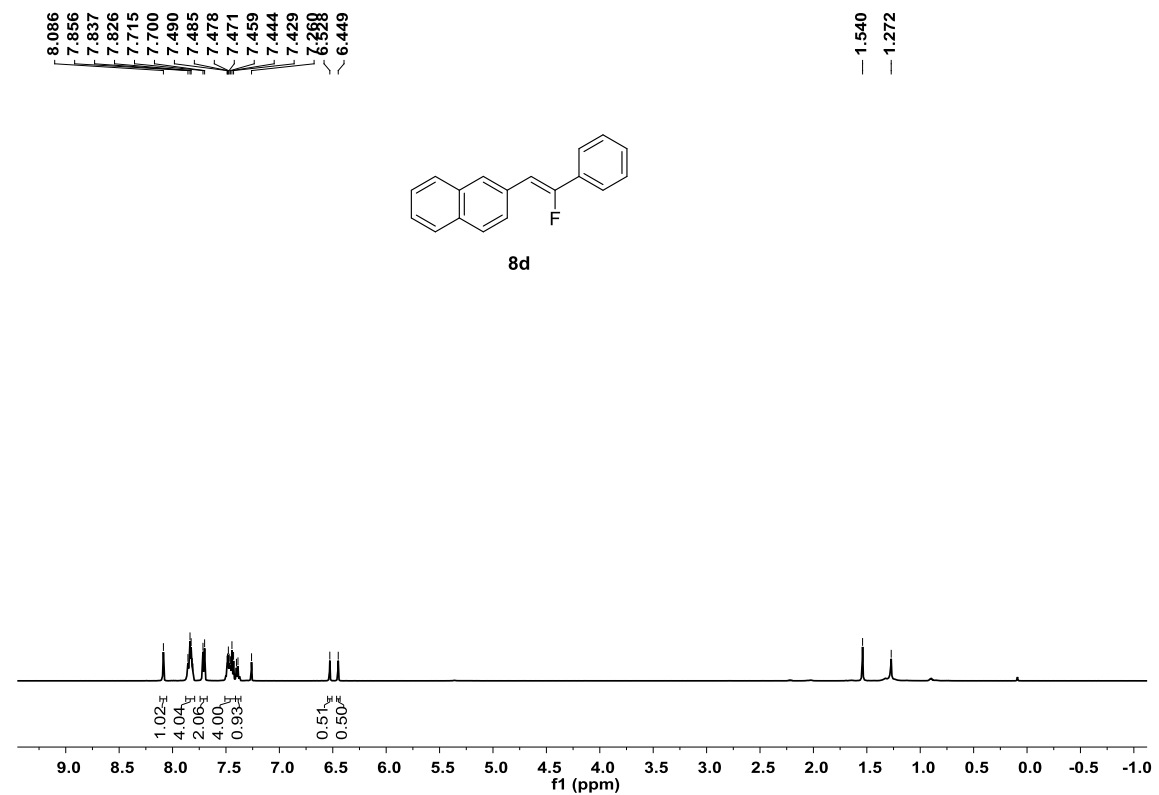

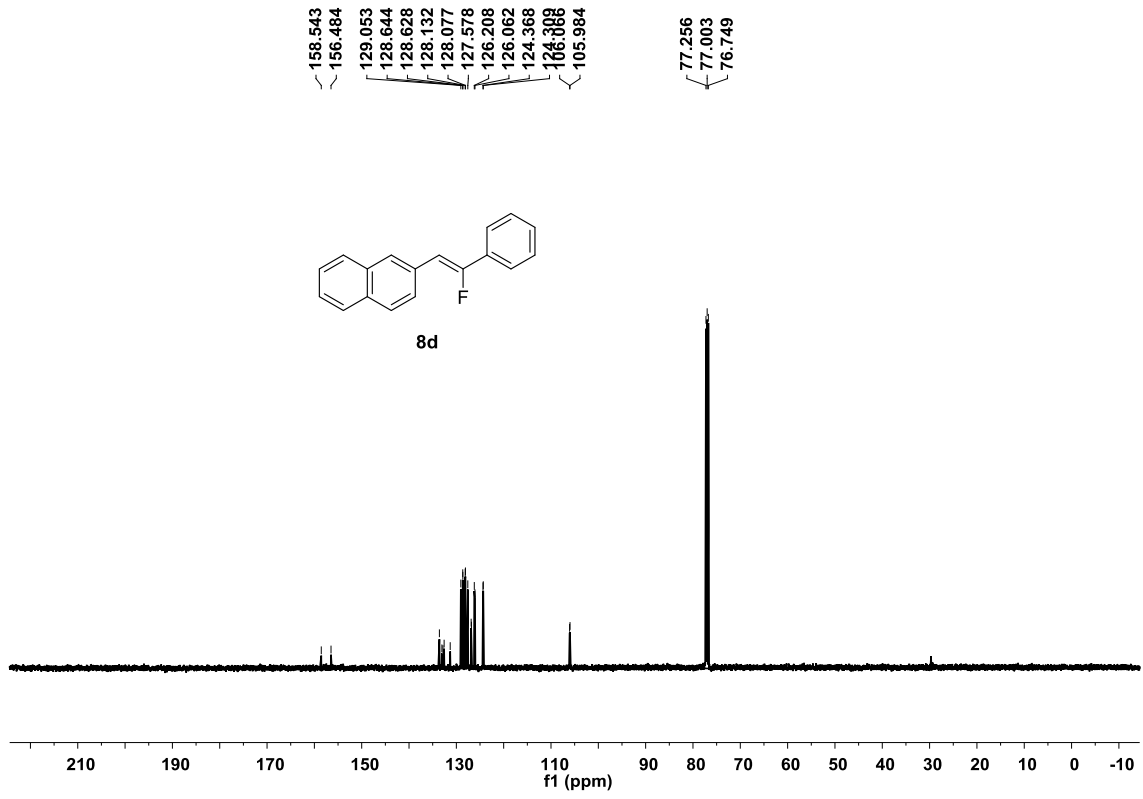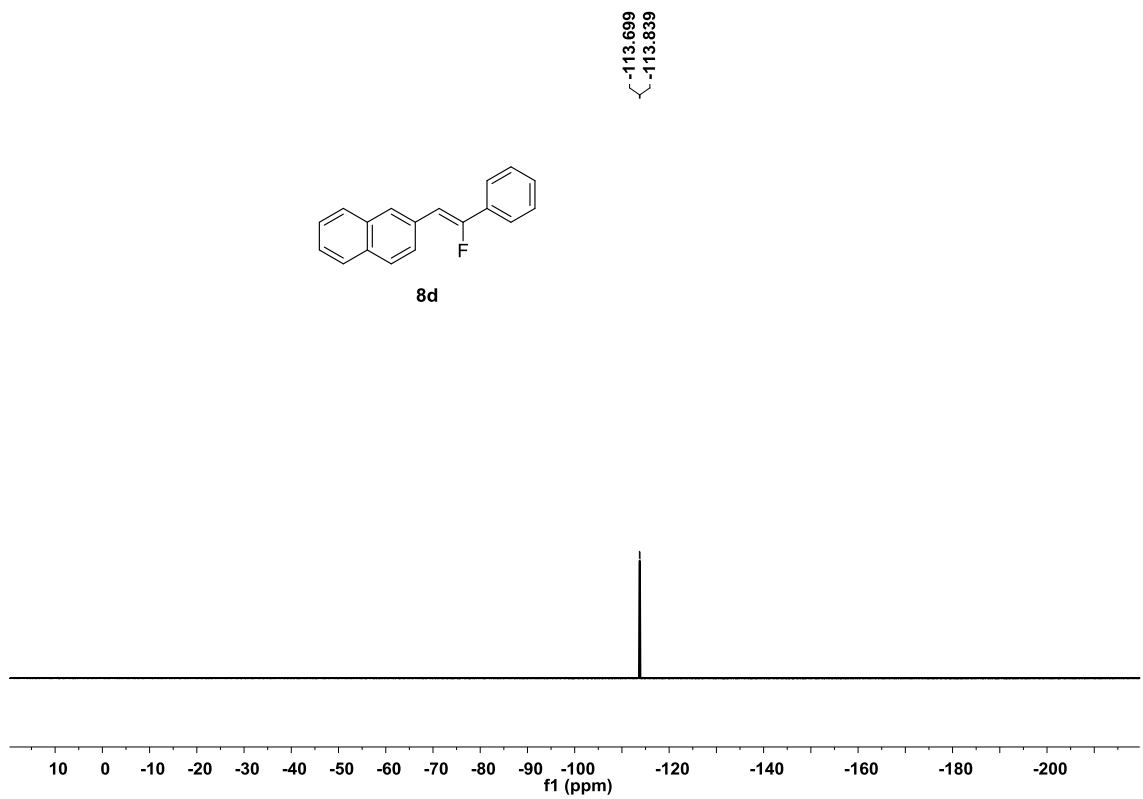

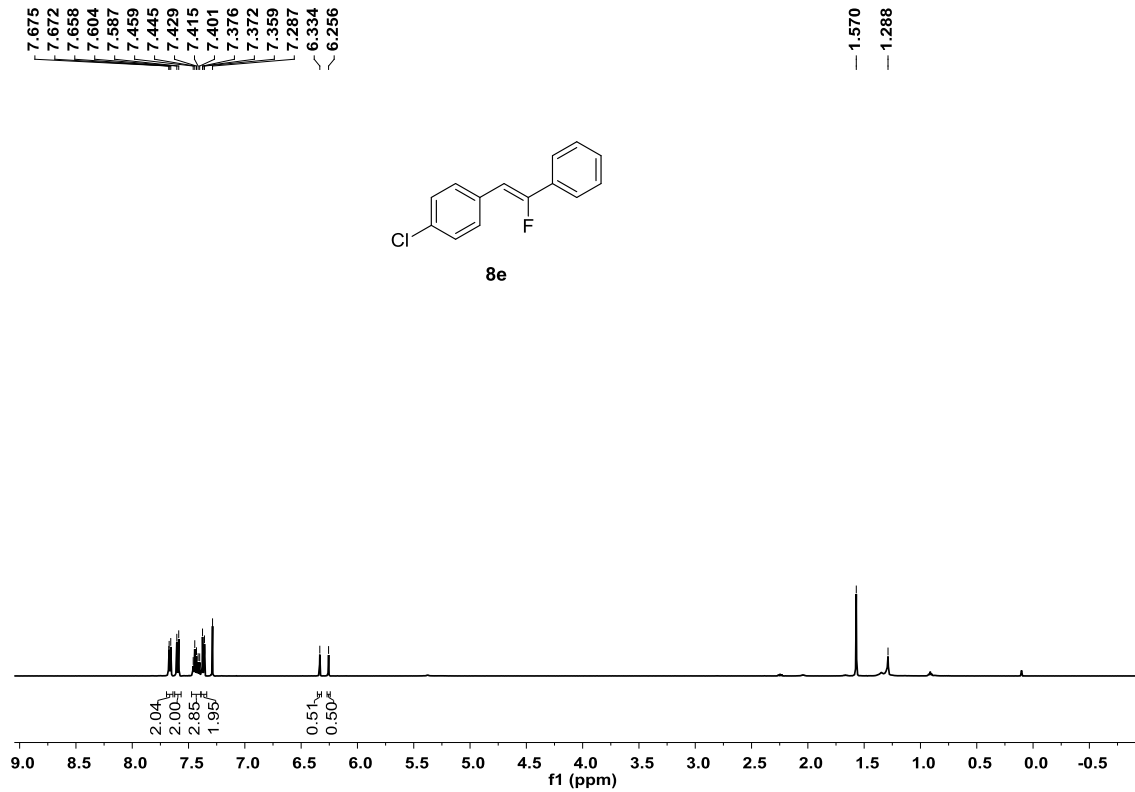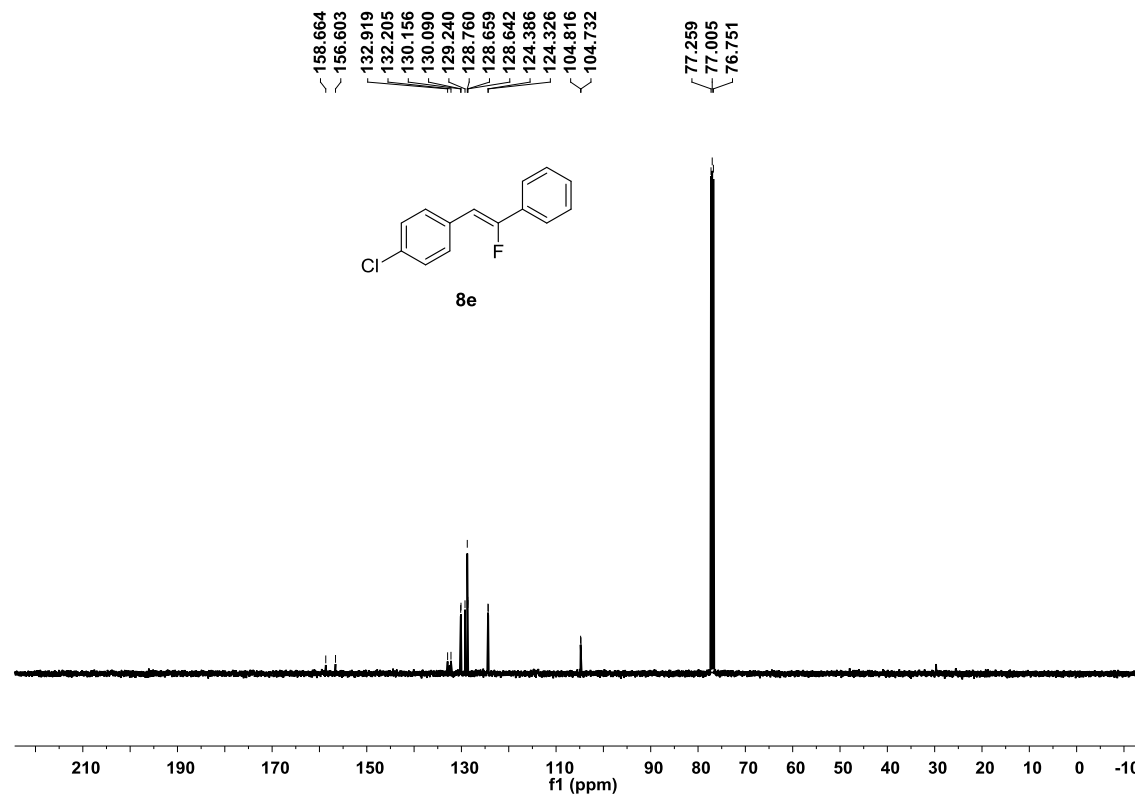

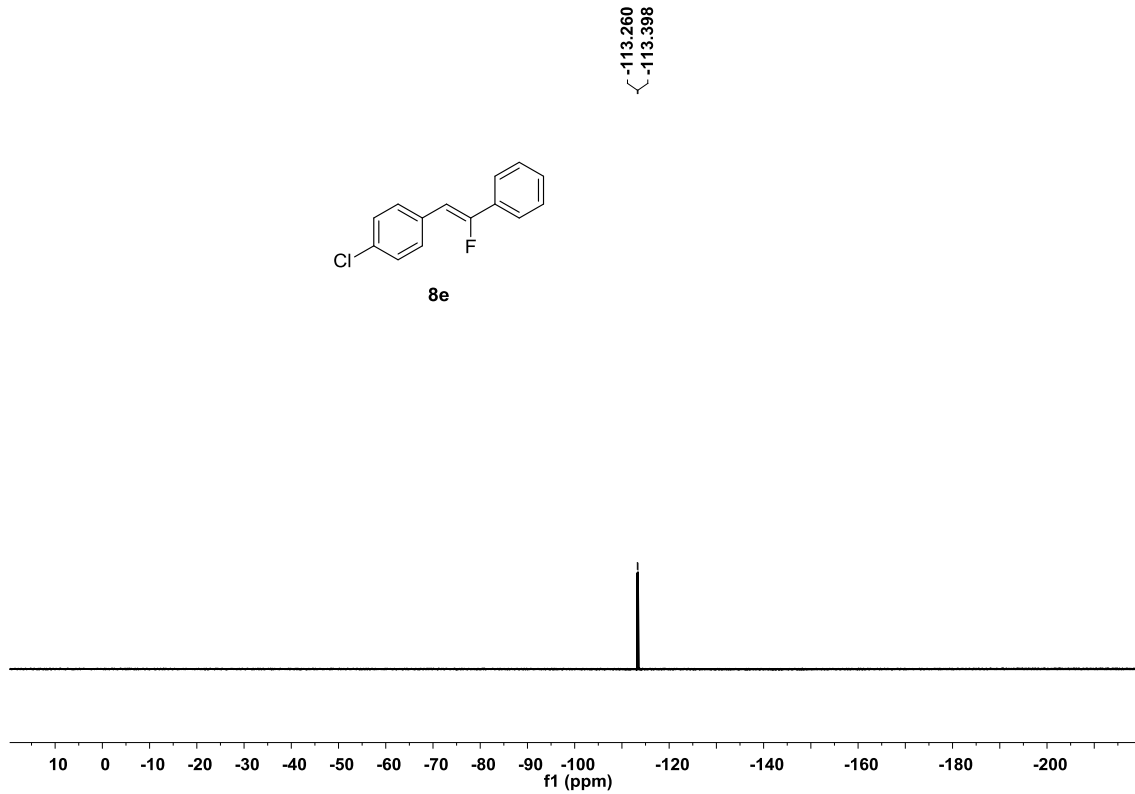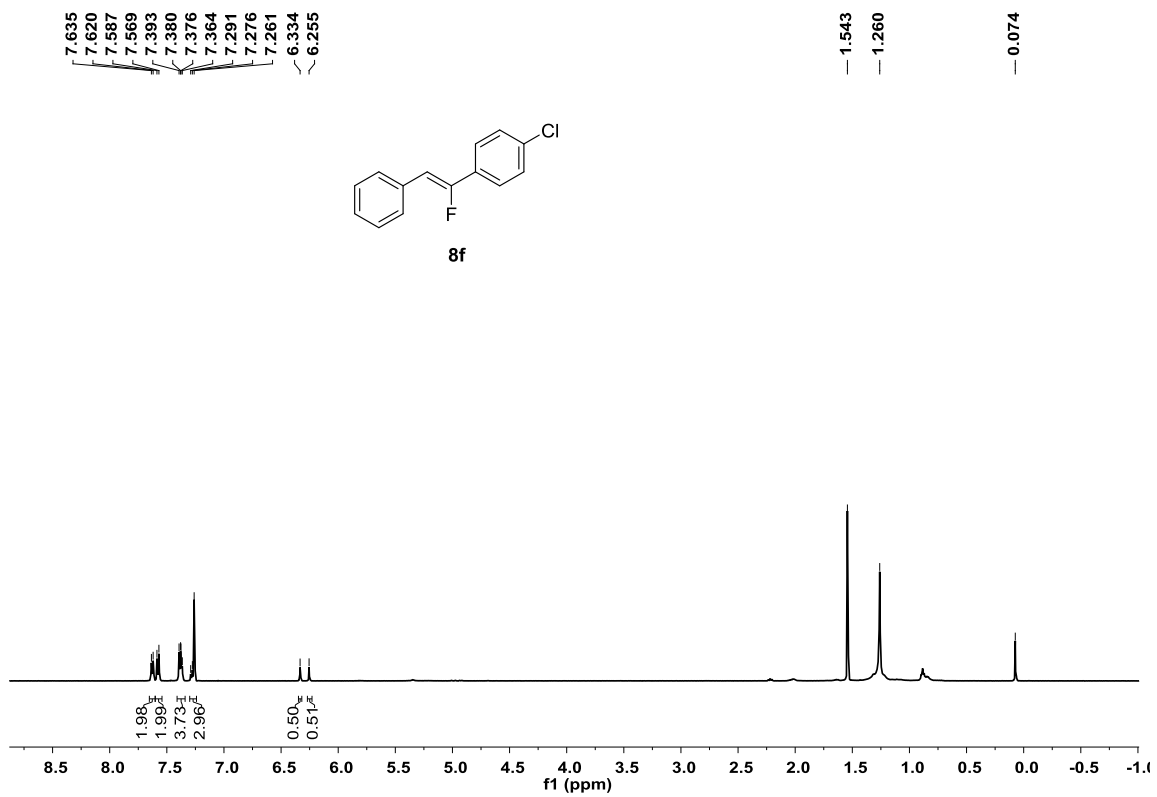

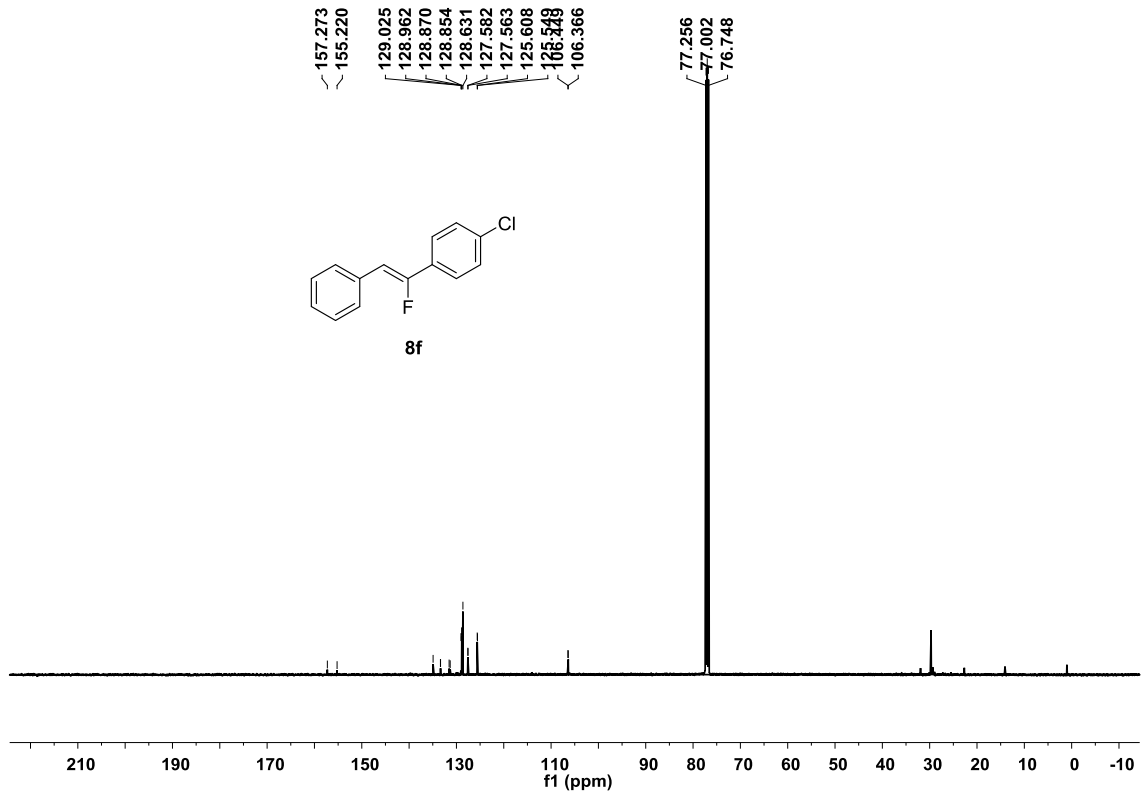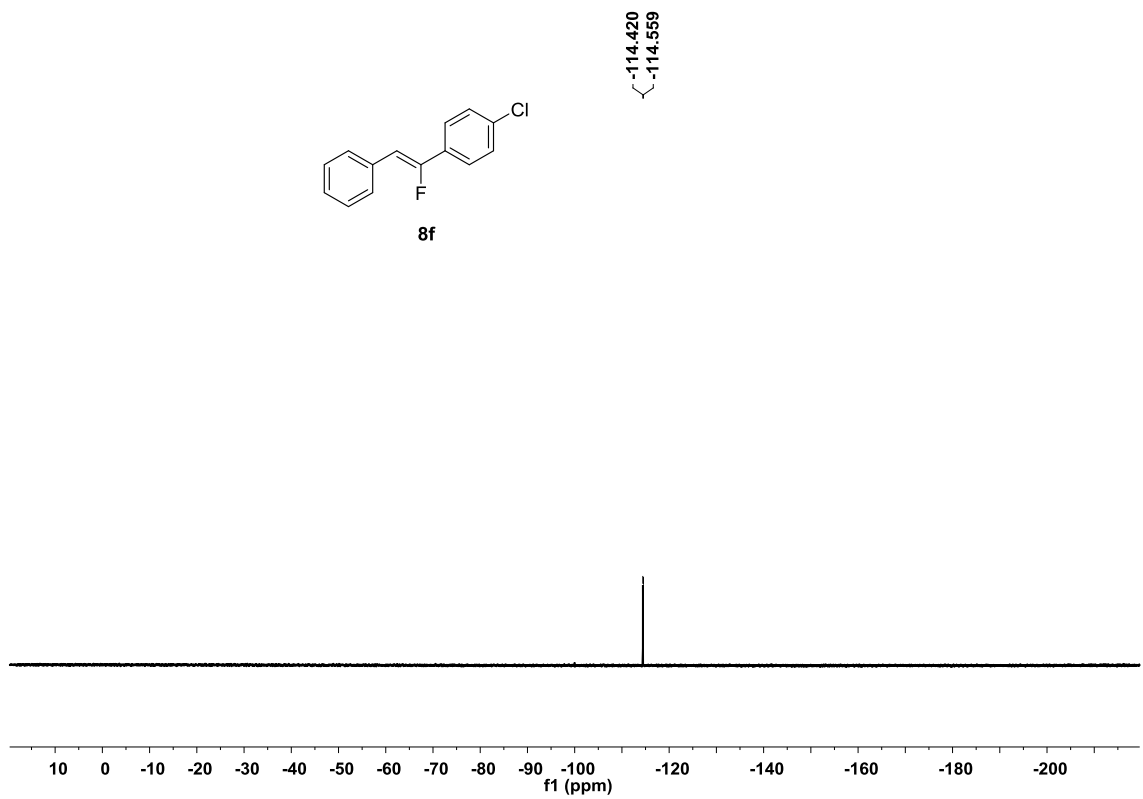

8.031  
8.014  
7.738  
7.722  
7.533  
7.518  
7.387  
7.372  
7.356  
7.325  
7.320  
7.285  
7.270  
7.261  
7.223  
7.207

-2.340

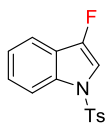

10

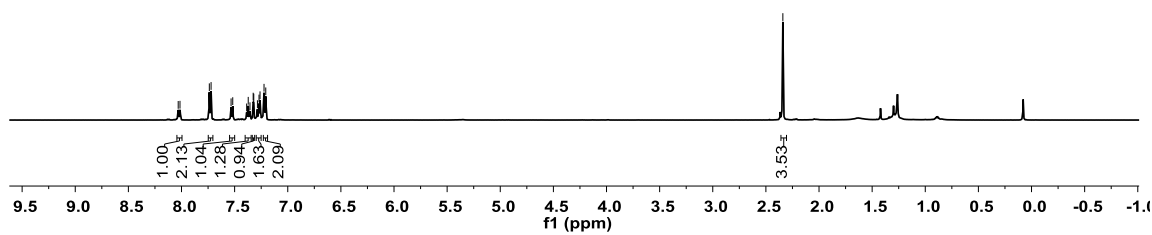

149.951  
147.920  
145.138  
134.781  
132.872  
132.831  
129.882  
126.836  
125.969  
123.636  
121.621  
121.470  
117.680  
117.660  
114.138  
114.129  
108.873  
108.645

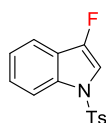

10

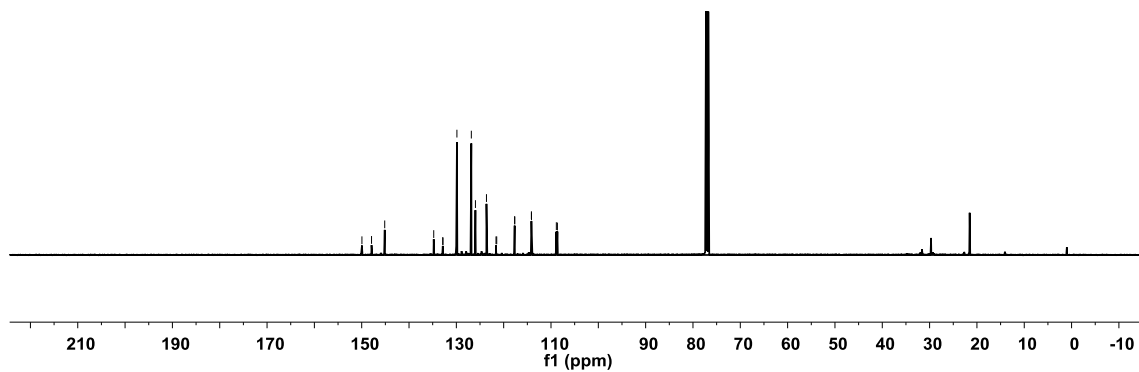



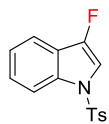

10

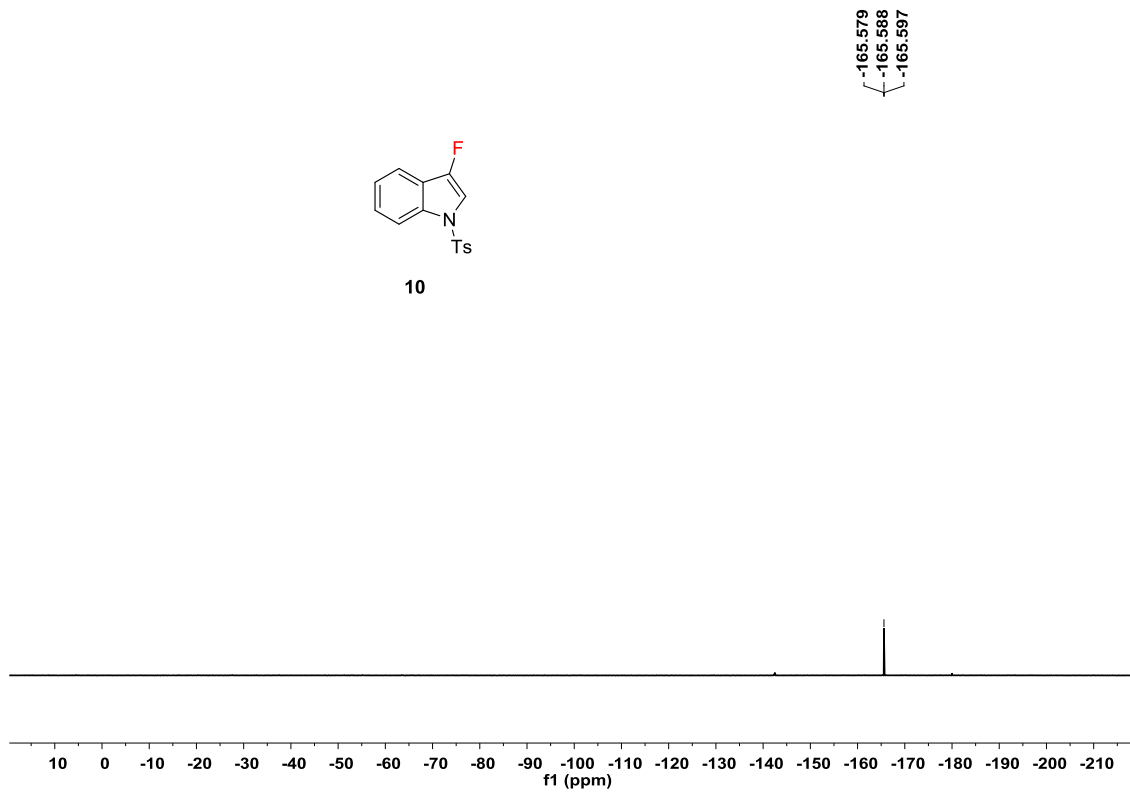

7.54  
7.53  
7.52  
7.51  
7.50  
7.49  
7.48  
7.47  
7.46  
7.45  
7.44  
7.43  
7.42  
7.41  
7.40  
7.39  
7.38  
7.37  
7.36  
7.35  
7.34  
7.33  
7.32  
7.31  
7.30  
7.29  
7.28  
7.27  
7.26  
7.25  
7.24  
7.23  
7.22  
7.21  
7.20  
7.19  
7.18  
7.17  
7.16  
7.15  
7.14  
7.13  
7.12  
7.11  
7.10  
7.09  
7.08  
7.07  
7.06  
7.05  
7.04  
7.03  
7.02  
7.01  
7.00  
6.99  
6.98  
6.97  
6.96  
6.95  
6.94  
6.93  
6.92  
6.91  
6.90  
6.89  
6.88  
6.87  
6.86  
6.85  
6.84  
6.83  
6.82  
6.81  
6.80  
6.79  
6.78  
6.77  
6.76  
6.75  
6.74  
6.73  
6.72  
6.71  
6.70  
6.69  
6.68  
6.67  
6.66  
6.65  
6.64  
6.63  
6.62  
6.61  
6.60  
6.59  
6.58  
6.57  
6.56  
6.55  
6.54  
6.53  
6.52  
6.51  
6.50  
6.49  
6.48  
6.47  
6.46  
6.45  
6.44  
6.43  
6.42  
6.41  
6.40  
6.39  
6.38  
6.37  
6.36  
6.35  
6.34  
6.33  
6.32  
6.31  
6.30  
6.29  
6.28  
6.27  
6.26  
6.25  
6.24  
6.23  
6.22  
6.21  
6.20  
6.19  
6.18  
6.17  
6.16  
6.15  
6.14  
6.13  
6.12  
6.11  
6.10  
6.09  
6.08  
6.07  
6.06  
6.05  
6.04  
6.03  
6.02  
6.01  
6.00  
5.99  
5.98  
5.97  
5.96  
5.95  
5.94  
5.93  
5.92  
5.91  
5.90  
5.89  
5.88  
5.87  
5.86  
5.85  
5.84  
5.83  
5.82  
5.81  
5.80  
5.79  
5.78  
5.77  
5.76  
5.75  
5.74  
5.73  
5.72  
5.71  
5.70  
5.69  
5.68  
5.67  
5.66  
5.65  
5.64  
5.63  
5.62  
5.61  
5.60  
5.59  
5.58  
5.57  
5.56  
5.55  
5.54  
5.53  
5.52  
5.51  
5.50  
5.49  
5.48  
5.47  
5.46  
5.45  
5.44  
5.43  
5.42  
5.41  
5.40  
5.39  
5.38  
5.37  
5.36  
5.35  
5.34  
5.33  
5.32  
5.31  
5.30  
5.29  
5.28  
5.27  
5.26  
5.25  
5.24  
5.23  
5.22  
5.21  
5.20  
5.19  
5.18  
5.17  
5.16  
5.15  
5.14  
5.13  
5.12  
5.11  
5.10  
5.09  
5.08  
5.07  
5.06  
5.05  
5.04  
5.03  
5.02  
5.01  
5.00  
4.99  
4.98  
4.97  
4.96  
4.95  
4.94  
4.93  
4.92  
4.91  
4.90  
4.89  
4.88  
4.87  
4.86  
4.85  
4.84  
4.83  
4.82  
4.81  
4.80  
4.79  
4.78  
4.77  
4.76  
4.75  
4.74  
4.73  
4.72  
4.71  
4.70  
4.69  
4.68  
4.67  
4.66  
4.65  
4.64  
4.63  
4.62  
4.61  
4.60  
4.59  
4.58  
4.57  
4.56  
4.55  
4.54  
4.53  
4.52  
4.51  
4.50  
4.49  
4.48  
4.47  
4.46  
4.45  
4.44  
4.43  
4.42  
4.41  
4.40  
4.39  
4.38  
4.37  
4.36  
4.35  
4.34  
4.33  
4.32  
4.31  
4.30  
4.29  
4.28  
4.27  
4.26  
4.25  
4.24  
4.23  
4.22  
4.21  
4.20  
4.19  
4.18  
4.17  
4.16  
4.15  
4.14  
4.13  
4.12  
4.11  
4.10  
4.09  
4.08  
4.07  
4.06  
4.05  
4.04  
4.03  
4.02  
4.01  
4.00  
3.99  
3.98  
3.97  
3.96  
3.95  
3.94  
3.93  
3.92  
3.91  
3.90  
3.89  
3.88  
3.87  
3.86  
3.85  
3.84  
3.83  
3.82  
3.81  
3.80  
3.79  
3.78  
3.77  
3.76  
3.75  
3.74  
3.73  
3.72  
3.71  
3.70  
3.69  
3.68  
3.67  
3.66  
3.65  
3.64  
3.63  
3.62  
3.61  
3.60  
3.59  
3.58  
3.57  
3.56  
3.55  
3.54  
3.53  
3.52  
3.51  
3.50  
3.49  
3.48  
3.47  
3.46  
3.45  
3.44  
3.43  
3.42  
3.41  
3.40  
3.39  
3.38  
3.37  
3.36  
3.35  
3.34  
3.33  
3.32  
3.31  
3.30  
3.29  
3.28  
3.27  
3.26  
3.25  
3.24  
3.23  
3.22  
3.21  
3.20  
3.19  
3.18  
3.17  
3.16  
3.15  
3.14  
3.13  
3.12  
3.11  
3.10  
3.09  
3.08  
3.07  
3.06  
3.05  
3.04  
3.03  
3.02  
3.01  
3.00  
2.99  
2.98  
2.97  
2.96  
2.95  
2.94  
2.93  
2.92  
2.91  
2.90  
2.89  
2.88  
2.87  
2.86  
2.85  
2.84  
2.83  
2.82  
2.81  
2.80  
2.79  
2.78  
2.77  
2.76  
2.75  
2.74  
2.73  
2.72  
2.71  
2.70  
2.69  
2.68  
2.67  
2.66  
2.65  
2.64  
2.63  
2.62  
2.61  
2.60  
2.59  
2.58  
2.57  
2.56  
2.55  
2.54  
2.53  
2.52  
2.51  
2.50  
2.49  
2.48  
2.47  
2.46  
2.45  
2.44  
2.43  
2.42  
2.41  
2.40  
2.39  
2.38  
2.37  
2.36  
2.35  
2.34  
2.33  
2.32  
2.31  
2.30  
2.29  
2.28  
2.27  
2.26  
2.25  
2.24  
2.23  
2.22  
2.21  
2.20  
2.19  
2.18  
2.17  
2.16  
2.15  
2.14  
2.13  
2.12  
2.11  
2.10  
2.09  
2.08  
2.07  
2.06  
2.05  
2.04  
2.03  
2.02  
2.01  
2.00  
1.99  
1.98  
1.97  
1.96  
1.95  
1.94  
1.93  
1.92  
1.91  
1.90  
1.89  
1.88  
1.87  
1.86  
1.85  
1.84  
1.83  
1.82  
1.81  
1.80  
1.79  
1.78  
1.77  
1.76  
1.75  
1.74  
1.73  
1.72  
1.71  
1.70  
1.69  
1.68  
1.67  
1.66  
1.65  
1.64  
1.63  
1.62  
1.61  
1.60  
1.59  
1.58  
1.57  
1.56  
1.55  
1.54  
1.53  
1.52  
1.51  
1.50  
1.49  
1.48  
1.47  
1.46  
1.45  
1.44  
1.43  
1.42  
1.41  
1.40  
1.39  
1.38  
1.37  
1.36  
1.35  
1.34  
1.33  
1.32  
1.31  
1.30  
1.29  
1.28  
1.27  
1.26  
1.25  
1.24  
1.23  
1.22  
1.21  
1.20  
1.19  
1.18  
1.17  
1.16  
1.15  
1.14  
1.13  
1.12  
1.11  
1.10  
1.09  
1.08  
1.07  
1.06  
1.05  
1.04  
1.03  
1.02  
1.01  
1.00  
0.99  
0.98  
0.97  
0.96  
0.95  
0.94  
0.93  
0.92  
0.91  
0.90  
0.89  
0.88  
0.87  
0.86  
0.85  
0.84  
0.83  
0.82  
0.81  
0.80  
0.79  
0.78  
0.77  
0.76  
0.75  
0.74  
0.73  
0.72  
0.71  
0.70  
0.69  
0.68  
0.67  
0.66  
0.65  
0.64  
0.63  
0.62  
0.61  
0.60  
0.59  
0.58  
0.57  
0.56  
0.55  
0.54  
0.53  
0.52  
0.51  
0.50  
0.49  
0.48  
0.47  
0.46  
0.45  
0.44  
0.43  
0.42  
0.41  
0.40  
0.39  
0.38  
0.37  
0.36  
0.35  
0.34  
0.33  
0.32  
0.31  
0.30  
0.29  
0.28  
0.27  
0.26  
0.25  
0.24  
0.23  
0.22  
0.21  
0.20  
0.19  
0.18  
0.17  
0.16  
0.15  
0.14  
0.13  
0.12  
0.11  
0.10  
0.09  
0.08  
0.07  
0.06  
0.05  
0.04  
0.03  
0.02  
0.01  
0.00

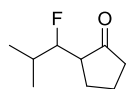

13a

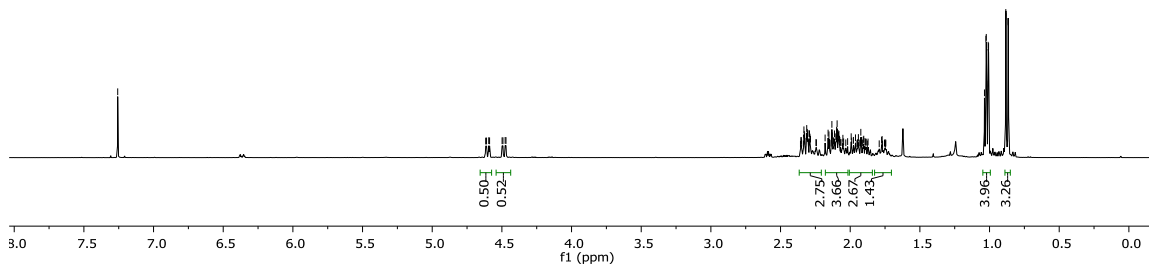

10913.2.fid  
130AMX500  
iPr  
218.343

97.354  
95.978

77.274  
77.018  
76.766

50.716  
50.529

38.721

31.016

30.858

22.858

22.826

20.759

18.456

18.416

18.291

18.227

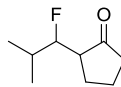

13a

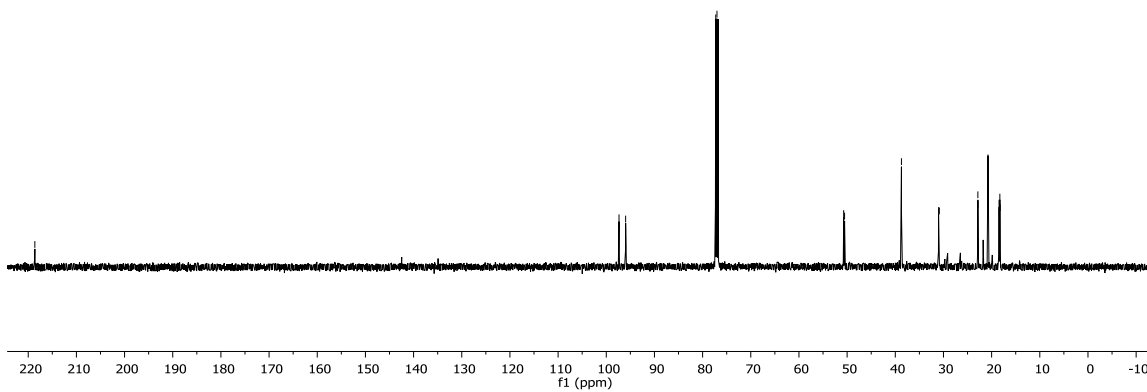

Sep13tl.11.fid  
tl-5-iPr

192.171  
192.203  
192.263  
192.296  
192.329  
192.389  
192.421

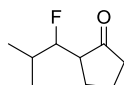

13a

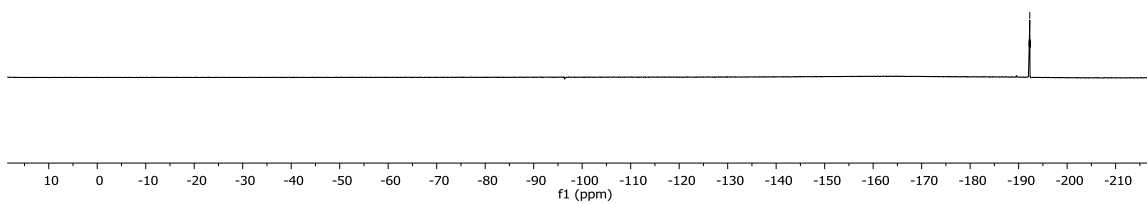

7.7269  
 7.2155  
 7.2134  
 7.2087  
 7.1867  
 7.282  
 5.272  
 5.268  
 2.195  
 2.1944  
 2.138  
 2.133  
 2.127  
 2.122  
 2.116  
 2.101  
 2.097  
 2.080  
 2.056  
 2.037  
 2.032  
 1.962  
 1.949  
 1.941  
 1.938  
 1.924  
 1.917  
 1.902  
 1.758  
 1.752  
 1.743  
 1.724  
 1.724  
 1.724  
 1.720  
 1.715  
 1.705  
 1.687  
 1.676  
 1.430  
 1.426  
 1.422  
 1.417  
 1.413  
 1.408  
 1.402  
 1.399  
 1.391  
 1.384  
 1.355  
 1.348  
 1.342  
 1.333  
 1.325  
 1.318  
 1.312  
 1.305  
 1.299  
 1.294  
 1.288  
 1.280  
 1.274  
 1.226  
 0.897  
 0.891  
 0.883  
 0.876  
 0.869  
 0.862

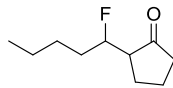

**13b**

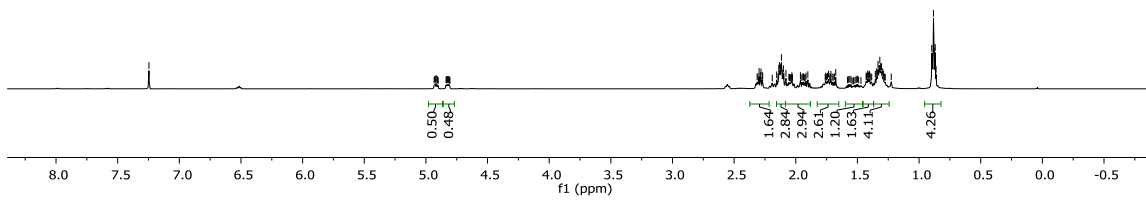

137.0925.fid  
 137.0925  
 211.8323

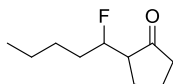

**13b**

92.606  
 91.251  
 77.284  
 77.030  
 76.775  
 52.715  
 52.533  
 38.743  
 33.183  
 33.019  
 27.397  
 27.327  
 23.043  
 23.013  
 22.361  
 20.676  
 13.899

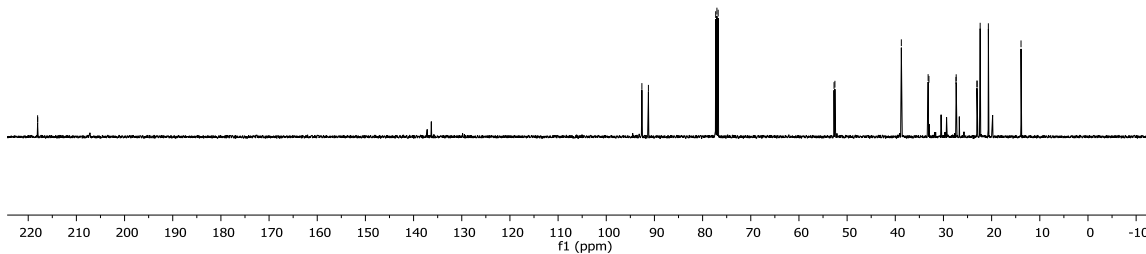

-189.375  
-189.413  
-189.459  
-189.499  
-189.542  
-189.582  
-189.589  
-189.619  
-189.626  
-189.670  
-189.709

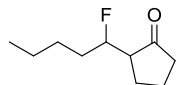

13b

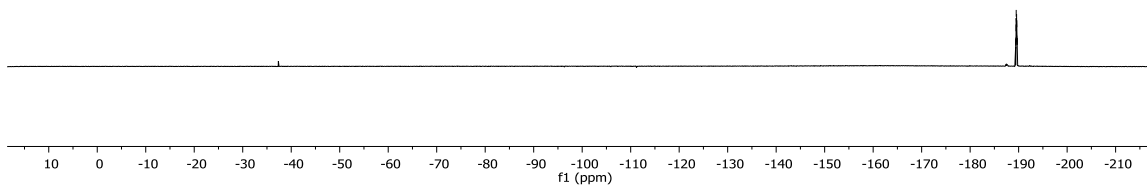

189.375  
189.413  
189.459  
189.499  
189.542  
189.582  
189.589  
189.619  
189.626  
189.670  
189.709

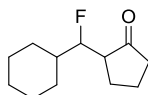

13c

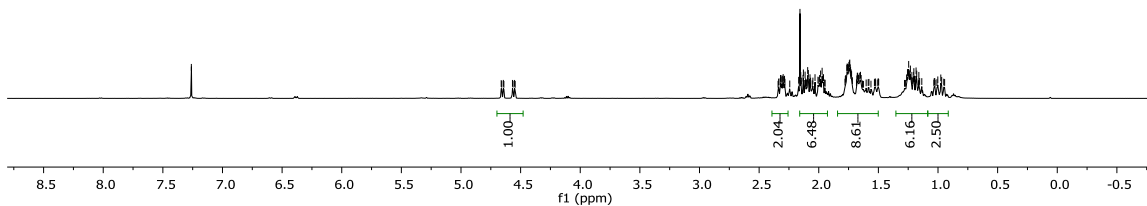

100912/3  
13C AMX500  
CY-218

96.485  
95.118

77.282  
77.028  
76.775

50.357  
50.168  
40.284  
40.130  
38.776  
28.865  
28.826  
28.308  
28.247  
26.127  
25.787  
25.391  
22.799  
22.768  
20.763

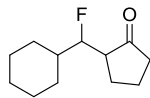

13c

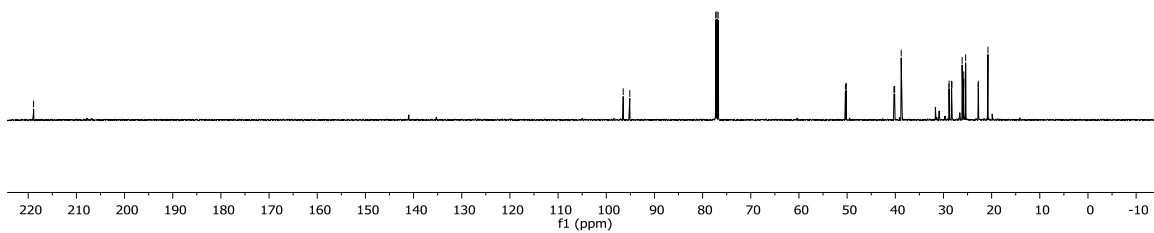

Sep09tl.3.fid  
tl-5-Cy-1

194.160  
194.191  
194.256  
194.286  
194.317  
194.382  
194.412

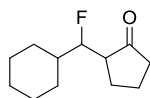

13c

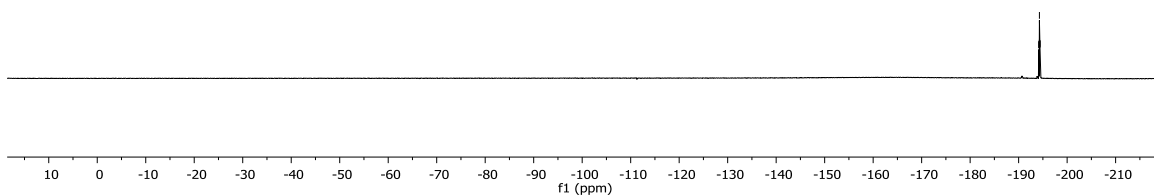

t0916.9.fid

9.852  
9.847

7.265  
7.145  
7.127  
6.938  
6.920

5.150  
5.056

3.821

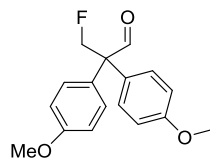

14a

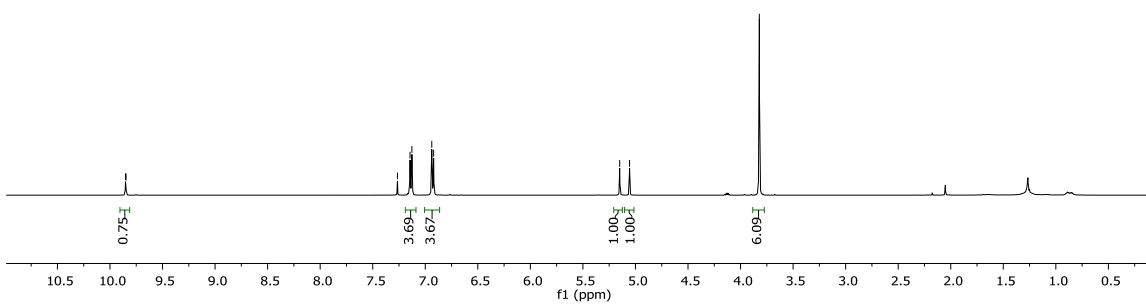

Sep16tl.12.fid  
tl-5-55-1

197.503  
197.469

159.219

130.010  
129.996  
129.034  
129.006

114.384

85.287  
83.515  
77.346  
77.028  
76.710

62.946  
62.767

55.293

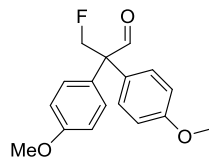

14a

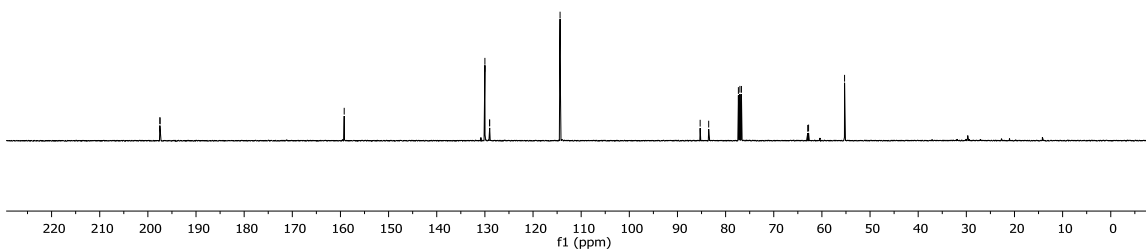

Sep16tl.10.fid  
tl-5-55-1

-126.721  
-126.731  
-126.866  
-126.876

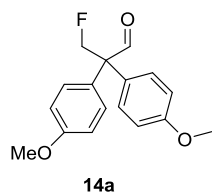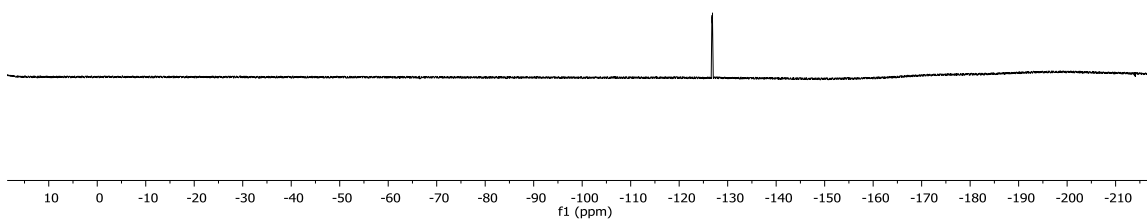

tl0924.1.fid  
1H AMX500  
TL-5-60 p-Me

7.260  
7.215  
7.199  
7.138  
7.125  
7.120  
7.108  
7.095  
7.091  
6.930  
6.912

5.160  
5.066

3.818

2.364

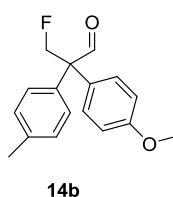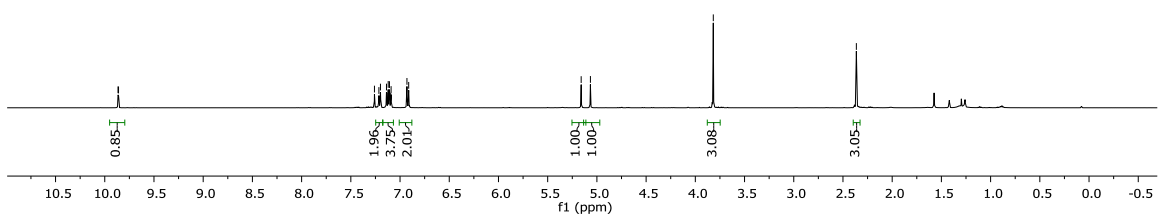

tl0924.2.fid  
13C AMX500  
TL-5-60 p-Me

197.569  
197.542

159.185

137.823  
134.197  
134.175  
130.019  
129.650  
128.678

114.349

85.040  
83.622  
77.245  
76.992  
76.738

63.239  
63.098  
55.276

21.017

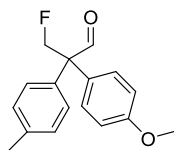

14b

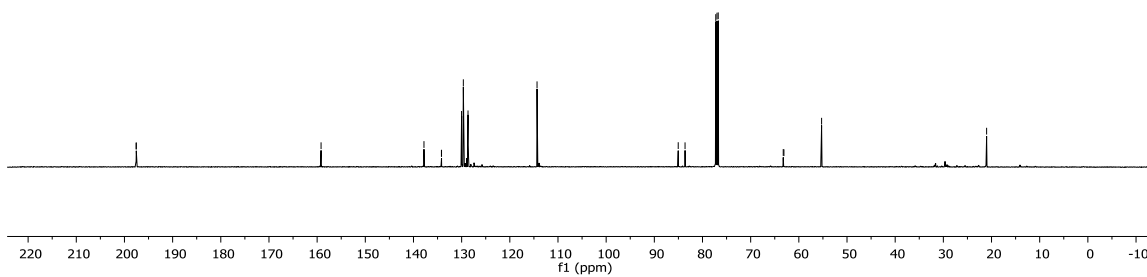

Sep29-2016-tl.4.fid  
tl-5-60 p-Me

126.700  
126.845

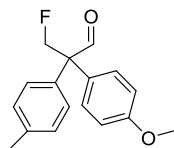

14b

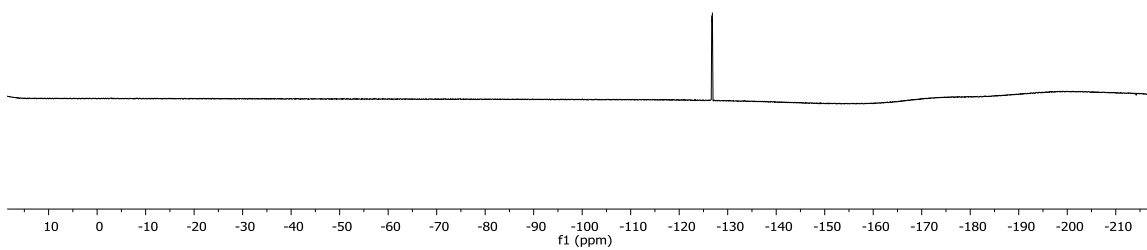



Sep30-2016-tl-5-61 p-Br  
9.843  
9.839

7.536  
7.515  
7.260  
7.114  
7.104  
7.089  
7.093  
7.087  
7.082  
7.074  
6.941  
6.919  
5.204  
5.180  
5.139  
5.115  
5.087  
5.063  
5.022  
4.998

3.819

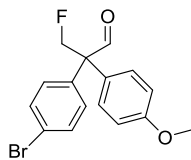

14c

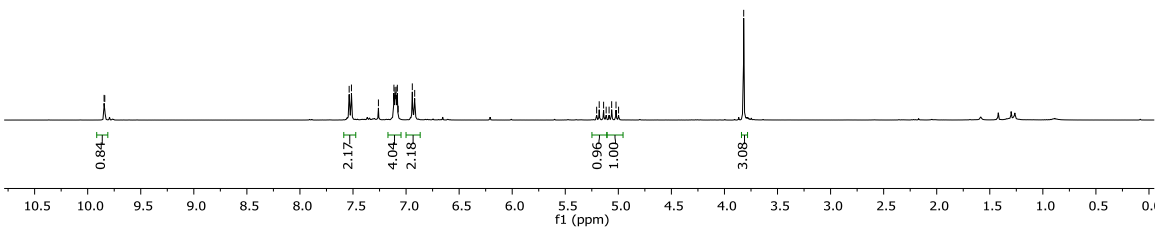

Sep30-2016-tl-5-61 p-Br  
196.879  
196.862

159.453  
136.638  
136.617  
132.060  
130.660  
130.645  
129.895  
129.885  
122.312  
114.622

85.019  
83.241  
77.347  
77.031  
76.712  
63.276  
63.097  
55.331

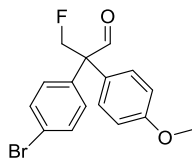

14c

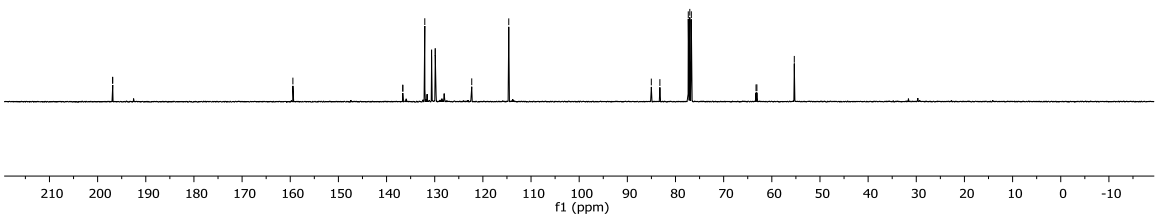

Sep30-2016-tl.4.fid  
tl-5-61 p-Br

-125.130  
-125.274  
-125.890  
-126.034  
-126.948  
-127.092  
-127.708  
-127.854

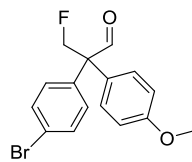

14c

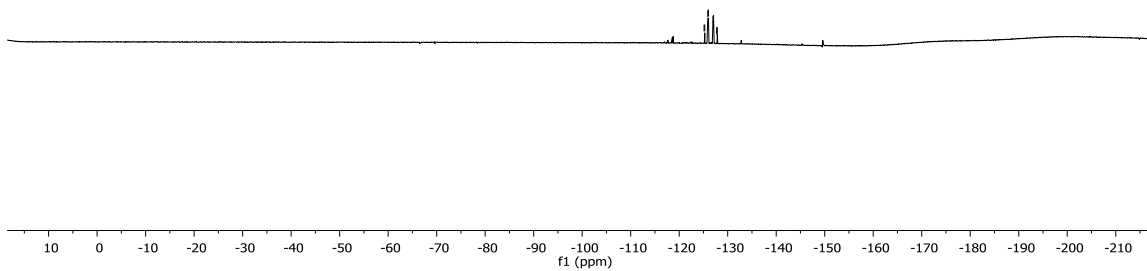

Sep29-2016-855.fid  
tl-5-62 p-Ph

9.934  
9.934  
7.644  
7.639  
7.628  
7.623  
7.618  
7.614  
7.609  
7.600  
7.596  
7.594  
7.478  
7.460  
7.440  
7.391  
7.373  
7.319  
7.303  
7.299  
7.259  
7.194  
7.172  
6.970  
6.948  
5.244  
5.237  
5.126  
5.120

3.834

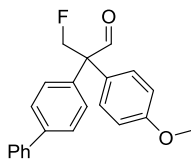

14d

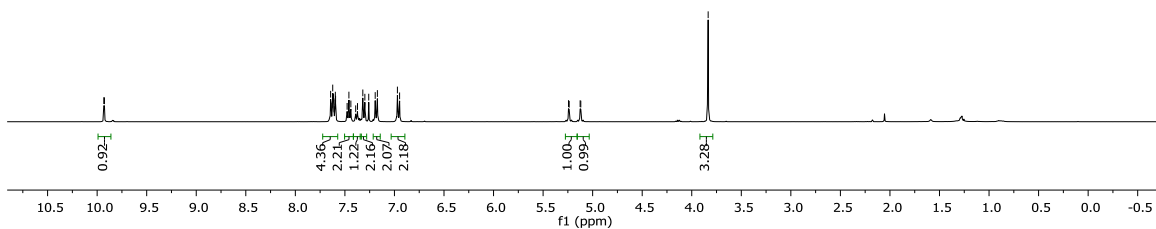

tl0922.8.fid  
13C AMX500  
TL-5-62 p-Ph

197.415  
197.387

159.321  
140.880  
140.244  
136.291  
136.271  
130.066  
128.290  
128.858  
127.611  
127.094  
114.491

85.054  
83.694  
77.271  
77.017  
76.763  
63.412  
63.269  
55.327

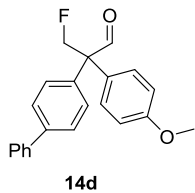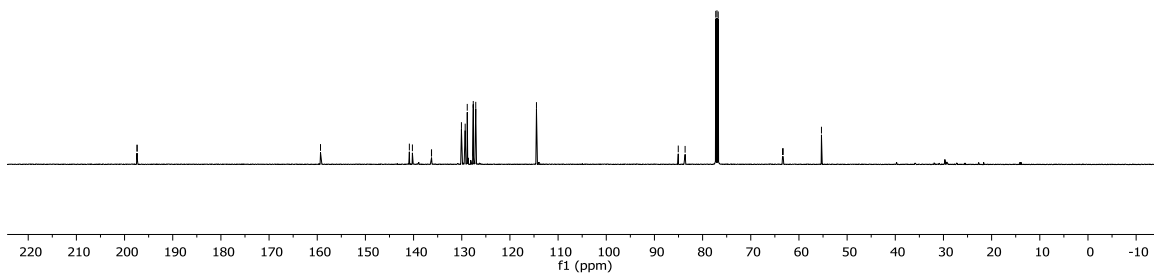

Sep29-2016-tl.6.fid  
tl-5-62 p-Ph

125.680  
125.825  
126.438  
126.534  
126.583  
126.679  
127.293  
127.437

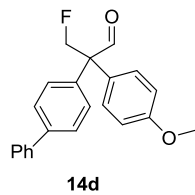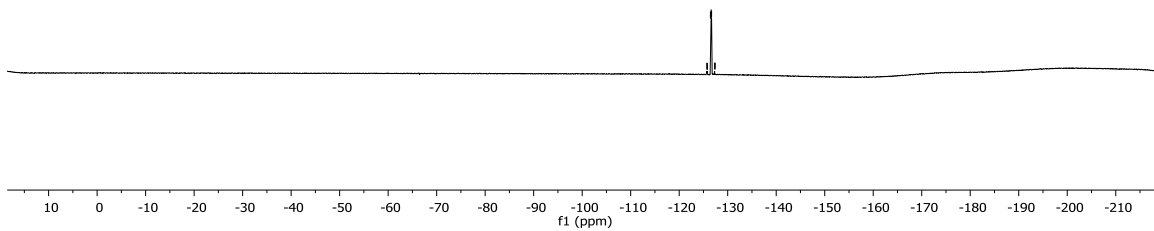

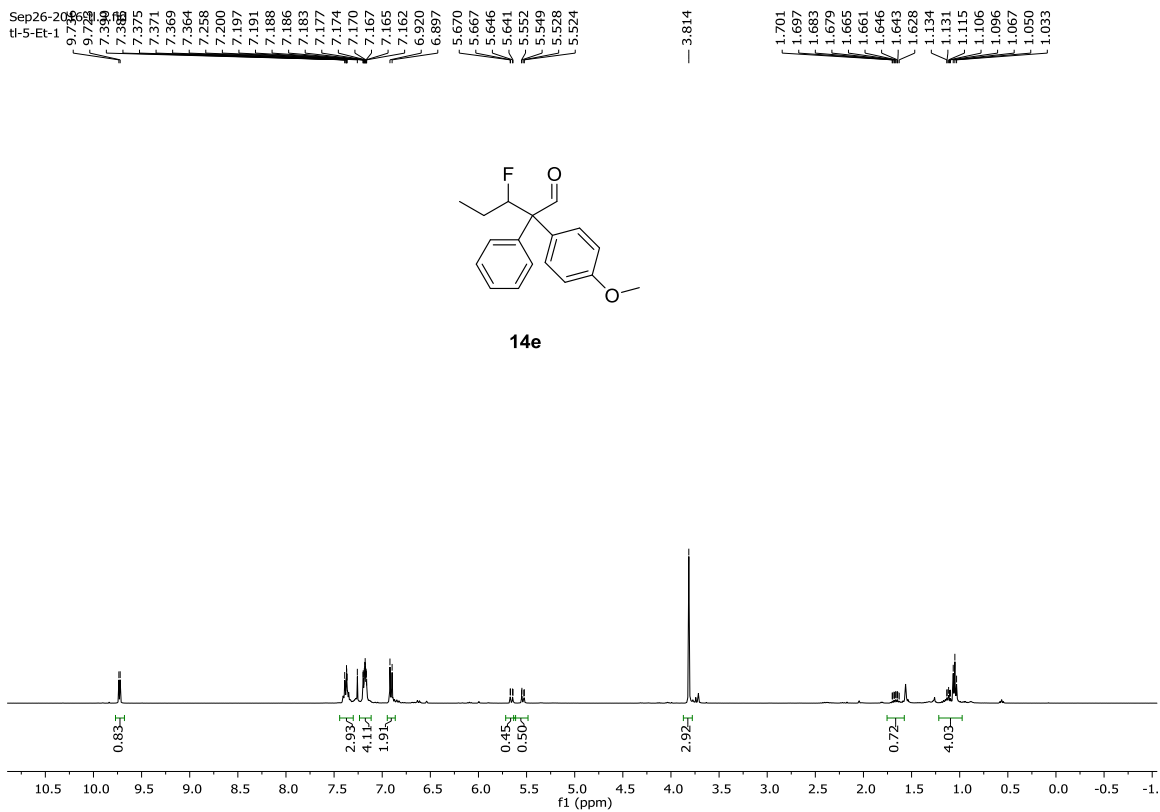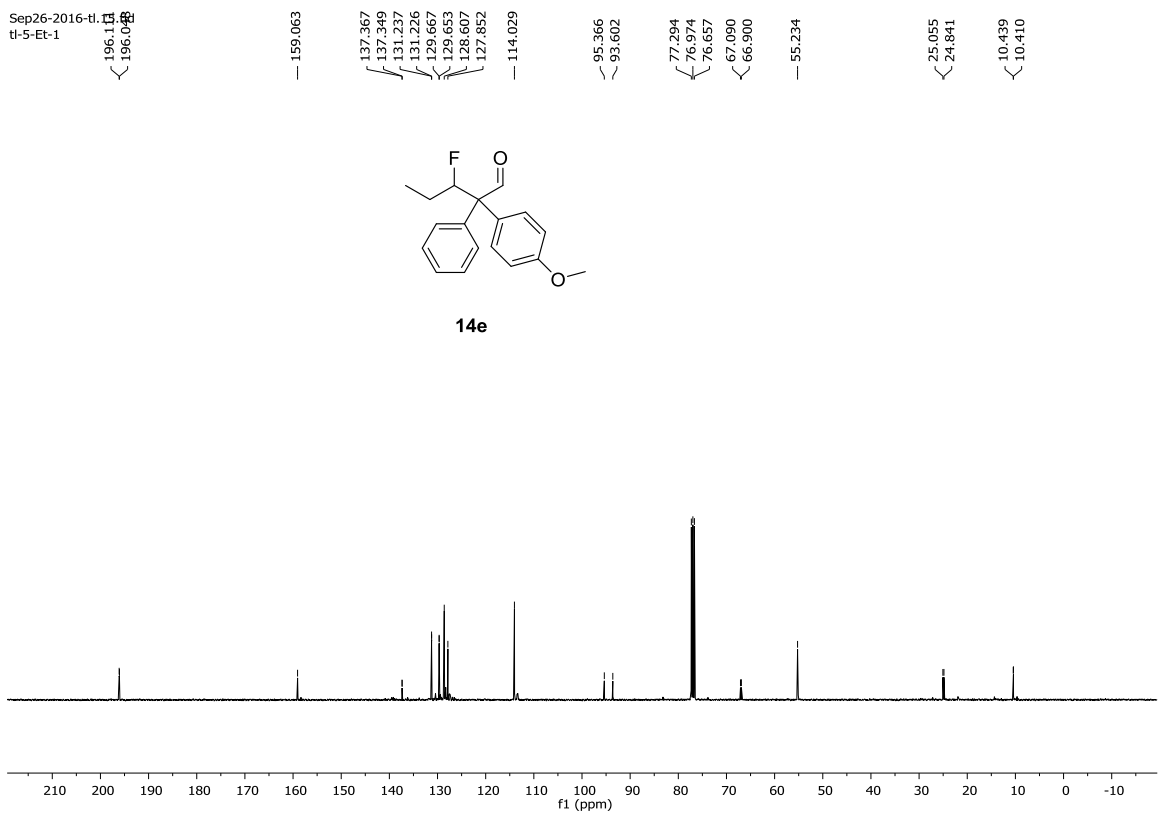

-196.325  
-196.425  
-196.457  
-196.553  
-196.586

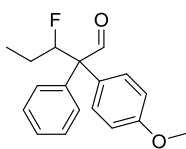

14e

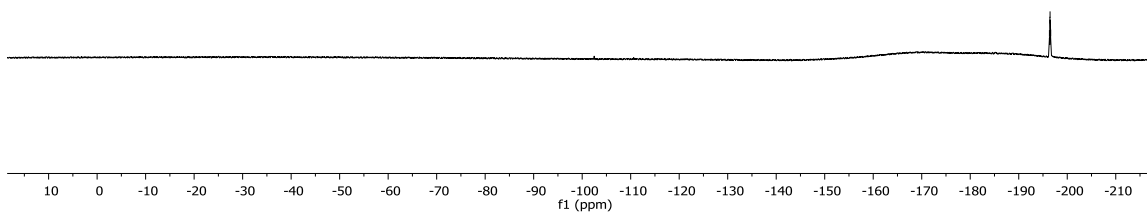

7.390  
7.376  
7.371  
7.365  
7.361  
7.257  
7.190  
7.185  
7.171  
7.168  
6.919  
6.896  
5.778  
5.753  
5.658  
5.636

3.815  
1.596  
1.587  
1.584  
1.578  
1.572  
1.565  
1.561  
1.554  
1.542  
1.536  
1.497  
1.488  
1.482  
1.477  
1.470  
1.314  
1.295  
1.291  
1.268  
1.260  
1.140  
1.115  
0.927  
0.909  
0.891  
0.891

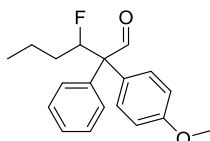

14f

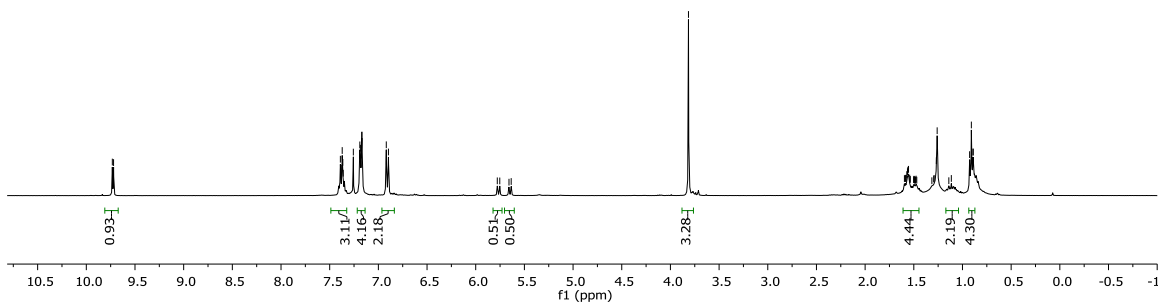

Sep26-2016-tl.8.fid  
tl-5-Pr-1

196.113  
196.113

159.094  
137.349  
137.330  
131.305  
131.292  
129.706  
129.692  
128.656  
128.382  
128.360  
127.884  
114.054

93.762  
92.006  
77.326  
77.210  
77.008  
76.690  
67.062  
66.871  
55.270

33.823  
33.612  
19.271  
19.250  
13.754

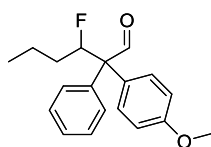

18f

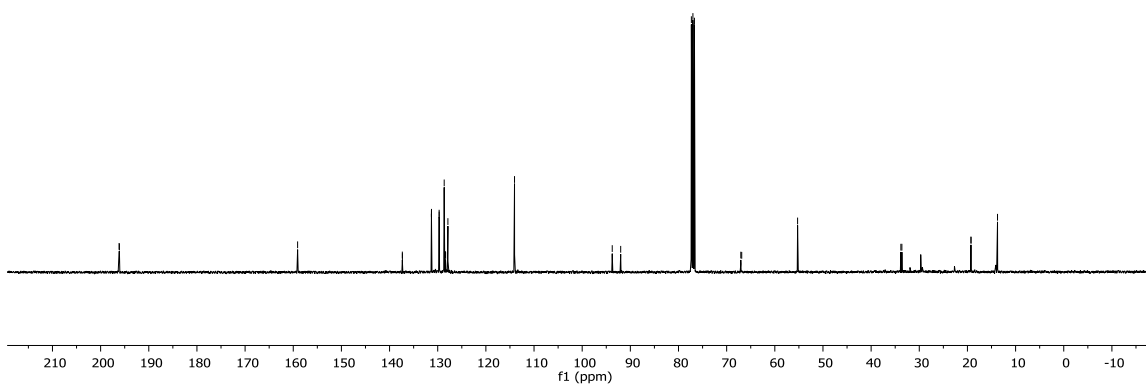

Sep26-2016-tl.8.fid  
tl-5-Pr-1

194.173  
194.307  
194.409

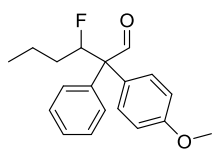

14f

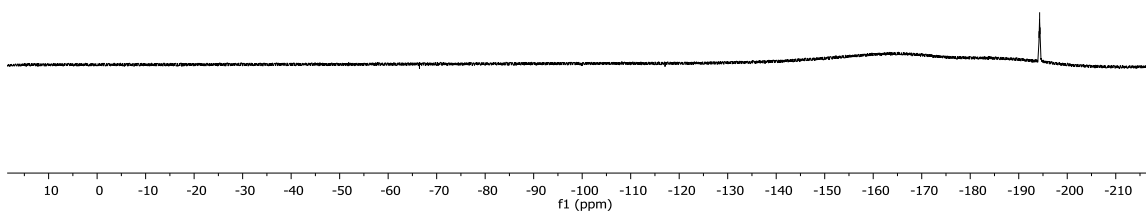

Nov12-2016-tl-16.fid  
 tl-5-83A-1

7.553  
 7.552  
 7.482  
 7.445  
 7.430  
 7.408  
 7.316  
 7.298  
 7.278  
 7.215  
 7.197  
 7.171  
 6.271  
 6.173

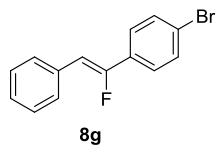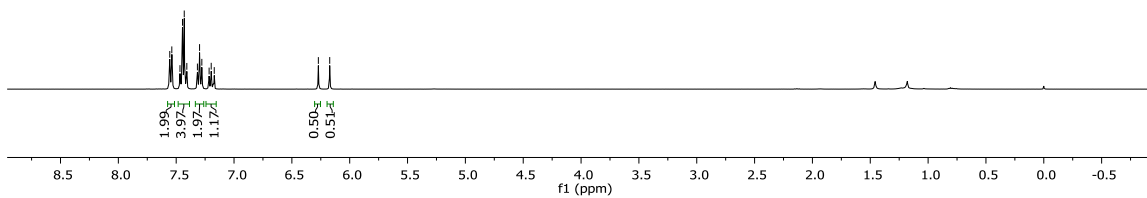

Nov12-2016-tl-16.fid  
 tl-5-83A-1

157.545  
 154.980  
 133.343  
 133.312  
 131.986  
 131.813  
 131.791  
 131.703  
 129.046  
 128.967  
 128.645  
 127.619  
 127.593  
 125.824  
 125.750  
 123.118  
 106.519  
 106.416  
 77.341  
 77.024  
 76.706

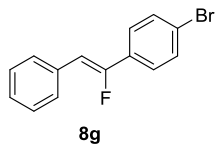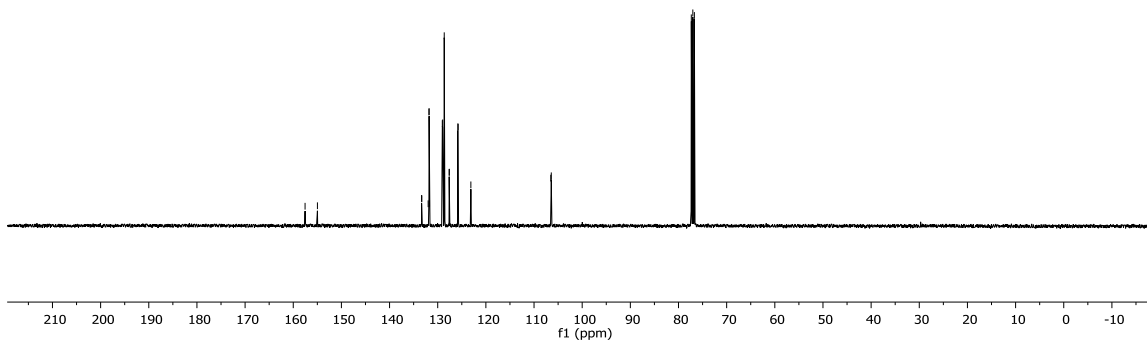

← -114.643  
← -114.748

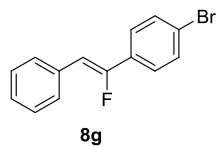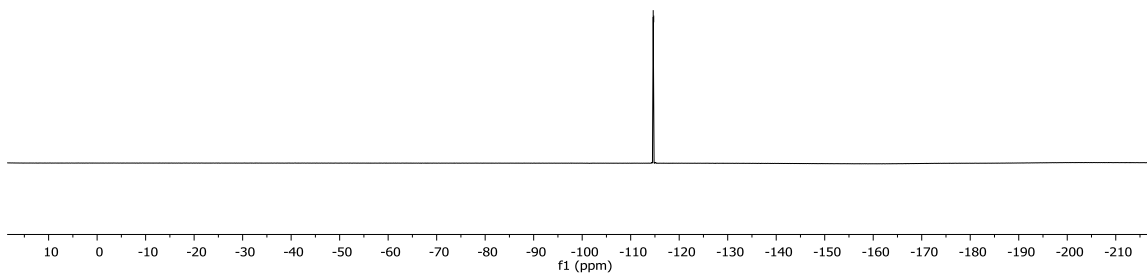

7.487  
7.485  
7.469  
7.467  
7.452  
7.437  
7.403  
7.389  
7.371  
7.353  
7.264  
7.159  
7.142  
7.124  
7.107  
6.799  
6.782

6.176  
6.133  
6.101  
6.071

— 3.773

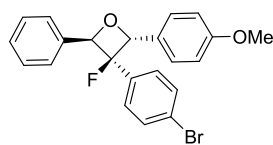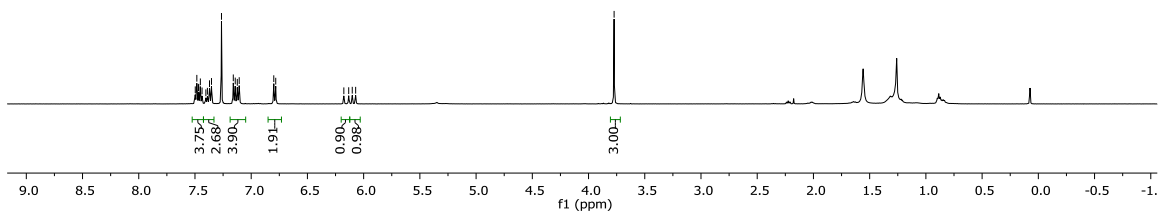



tl1109.3.fid  
13C AMX500  
TL-5-83 Cyclobut

159.259  
135.597  
135.557  
134.707  
134.512  
131.174  
128.521  
128.421  
128.365  
128.313  
127.217  
127.141  
126.765  
126.346  
122.641  
122.626  
113.762

99.236  
97.524  
90.776  
90.534  
88.688  
88.515  
77.259  
77.005  
76.751

55.192

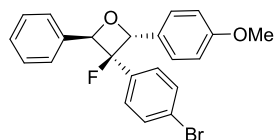

15

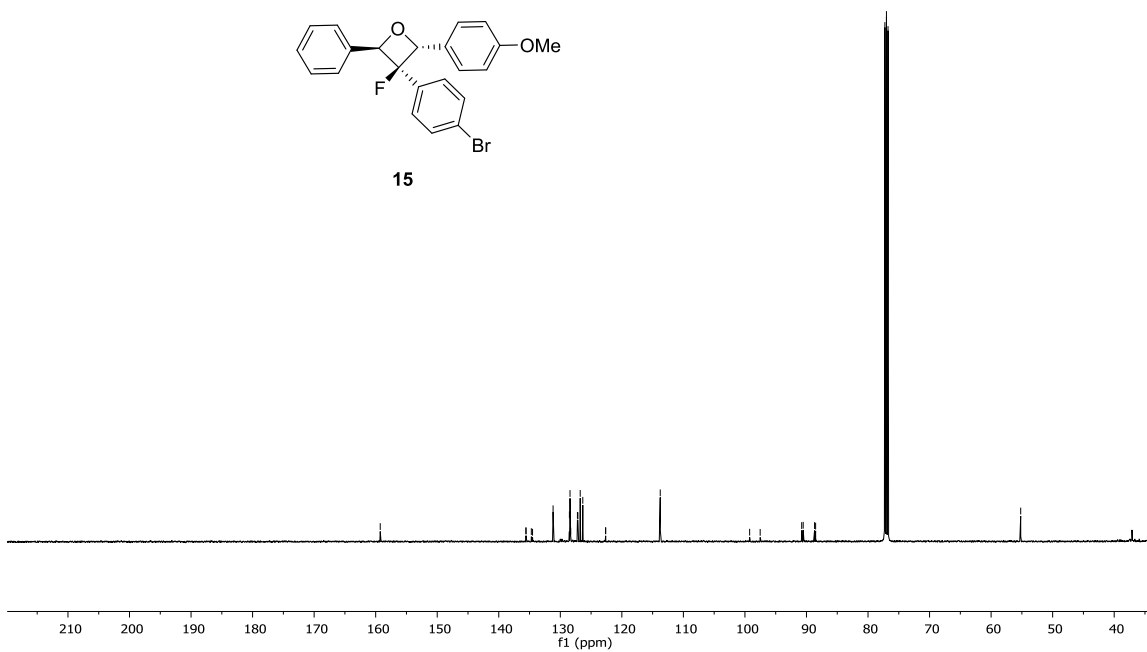

Nov09-2016-tl.2.fid  
tl-5-83 cyclo

151.741  
151.781  
151.796  
151.839

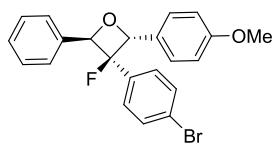

15

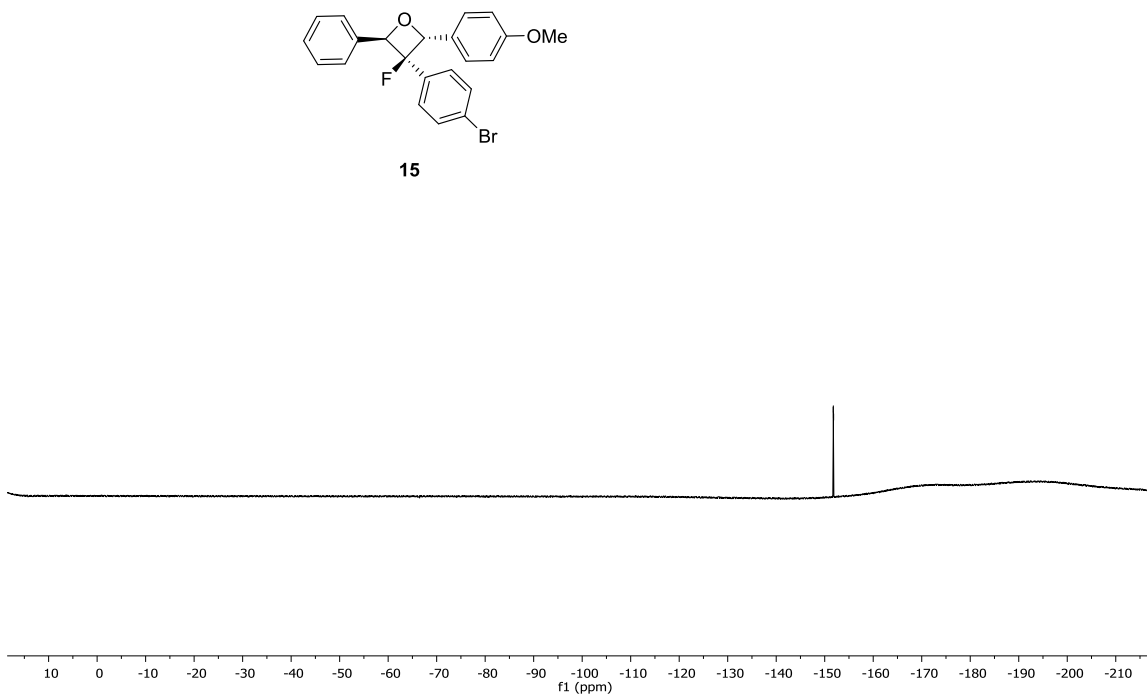

t11107.4.fid  
2  
9.757  
9.746

7.484  
7.466  
7.265  
7.230  
7.216  
7.201  
7.151  
7.135  
7.118  
6.937  
6.920  
6.846  
6.833  
6.789  
6.701

3.821

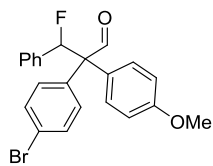

17

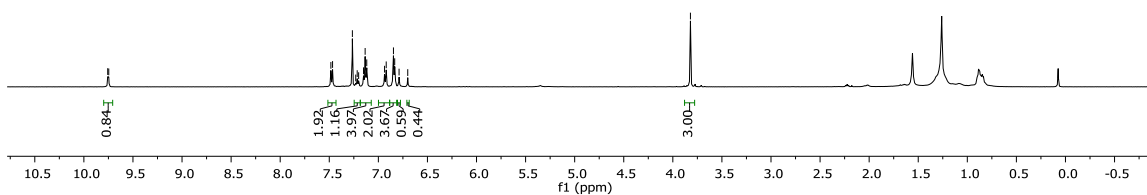

Nov09-2016-tl.12.fid  
tl-5-83 aldehyde

195.370  
195.309

159.426

136.088  
135.878  
132.004  
131.635  
131.598  
128.478  
127.730  
127.656  
127.507  
127.486  
127.232  
113.845

93.947  
92.150

77.323  
77.006  
76.688

68.706  
68.484

55.299

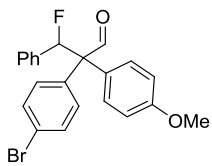

17

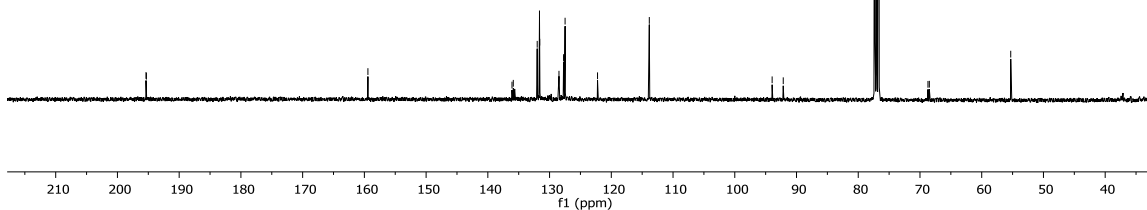

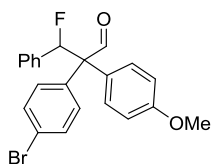

17

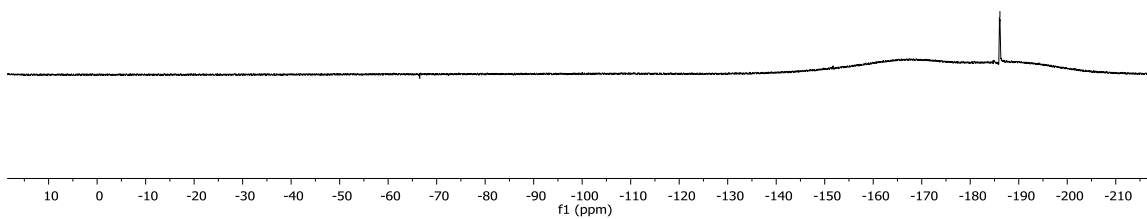

7.494  
7.469  
7.357  
7.333  
7.307  
7.260  
7.220  
7.195  
6.718  
6.718  
6.693  
6.643  
6.614  
5.565  
5.434  
3.200  
3.178  
3.156  
3.127  
2.849  
2.430  
2.369  
2.346  
1.761  
1.738  
1.715  
1.279

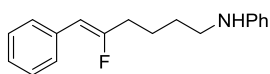

18

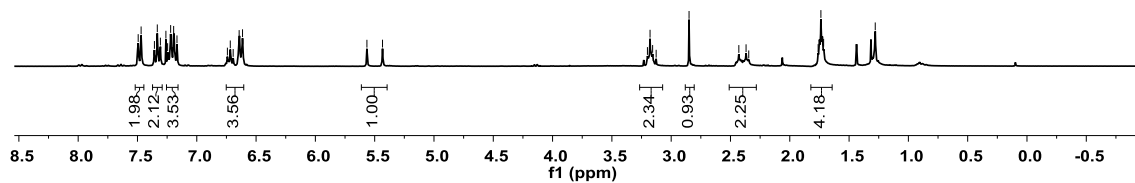

161.587  
159.467  
148.267  
133.683  
129.240  
128.385  
128.285  
128.227  
126.699  
117.278  
112.727  
106.154  
106.084  
77.254  
77.000  
76.746  
43.642  
32.934  
32.721  
28.781  
23.949

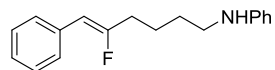

18

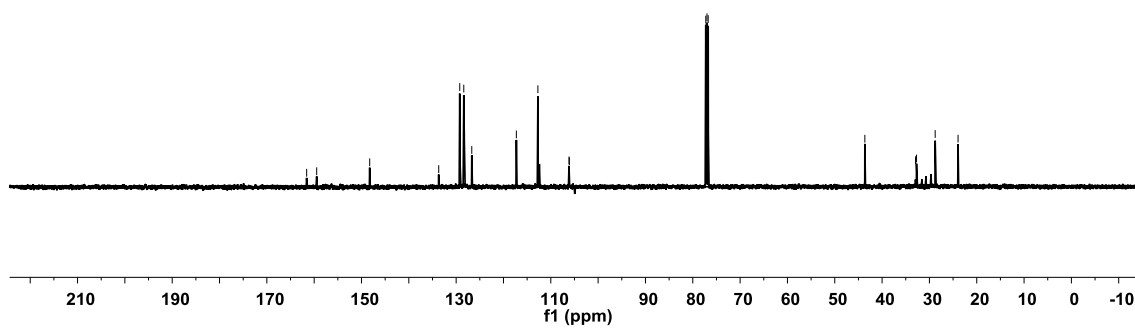

-101.182  
-101.246  
-101.312  
-101.321  
-101.386  
-101.451

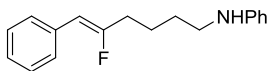

18

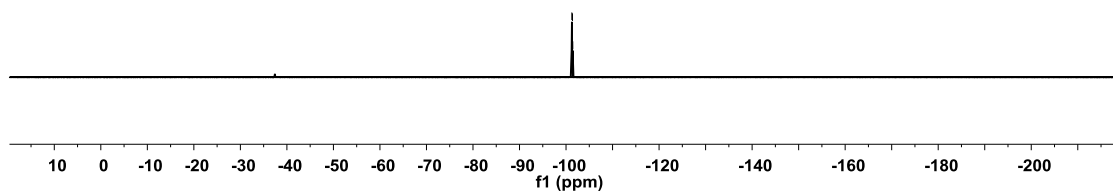

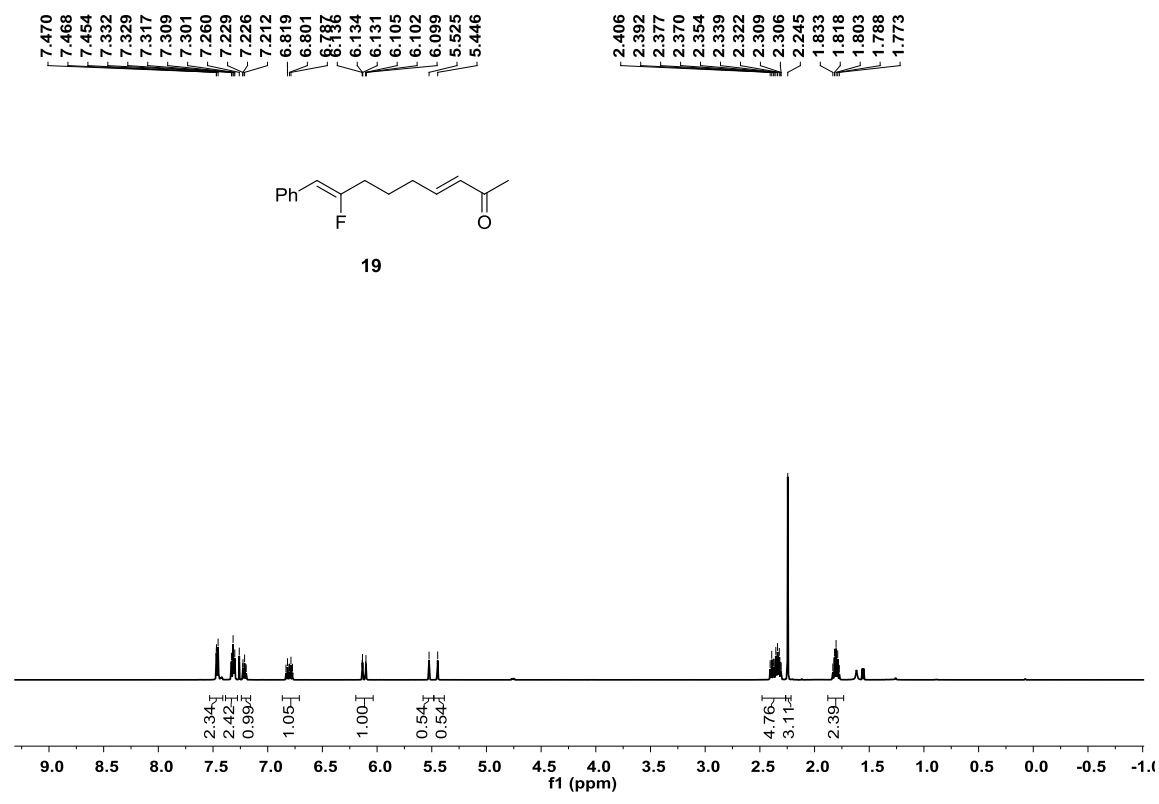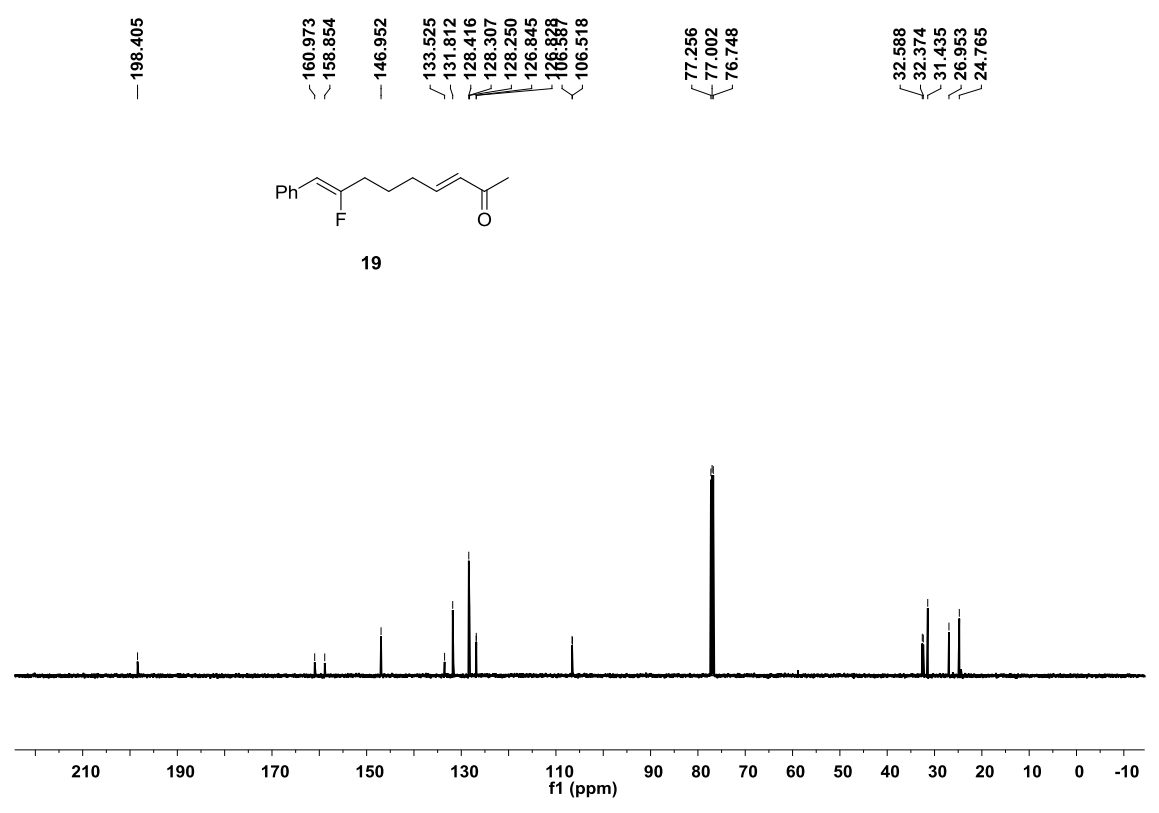

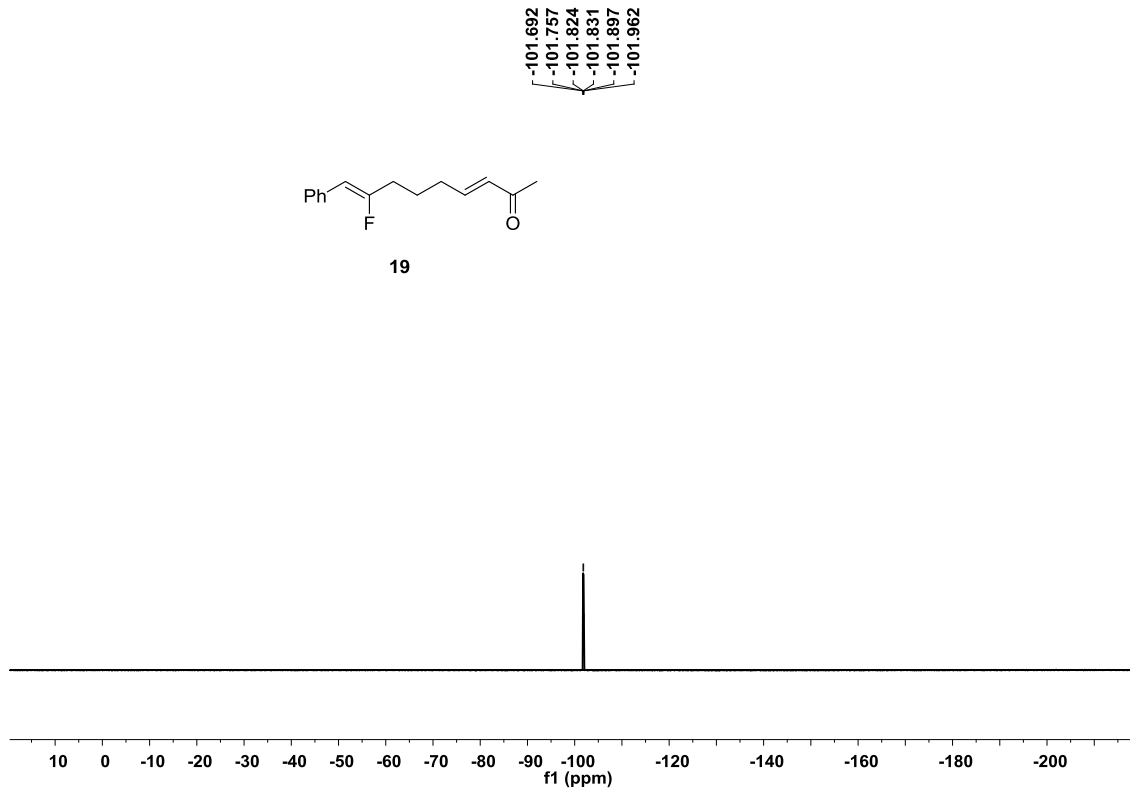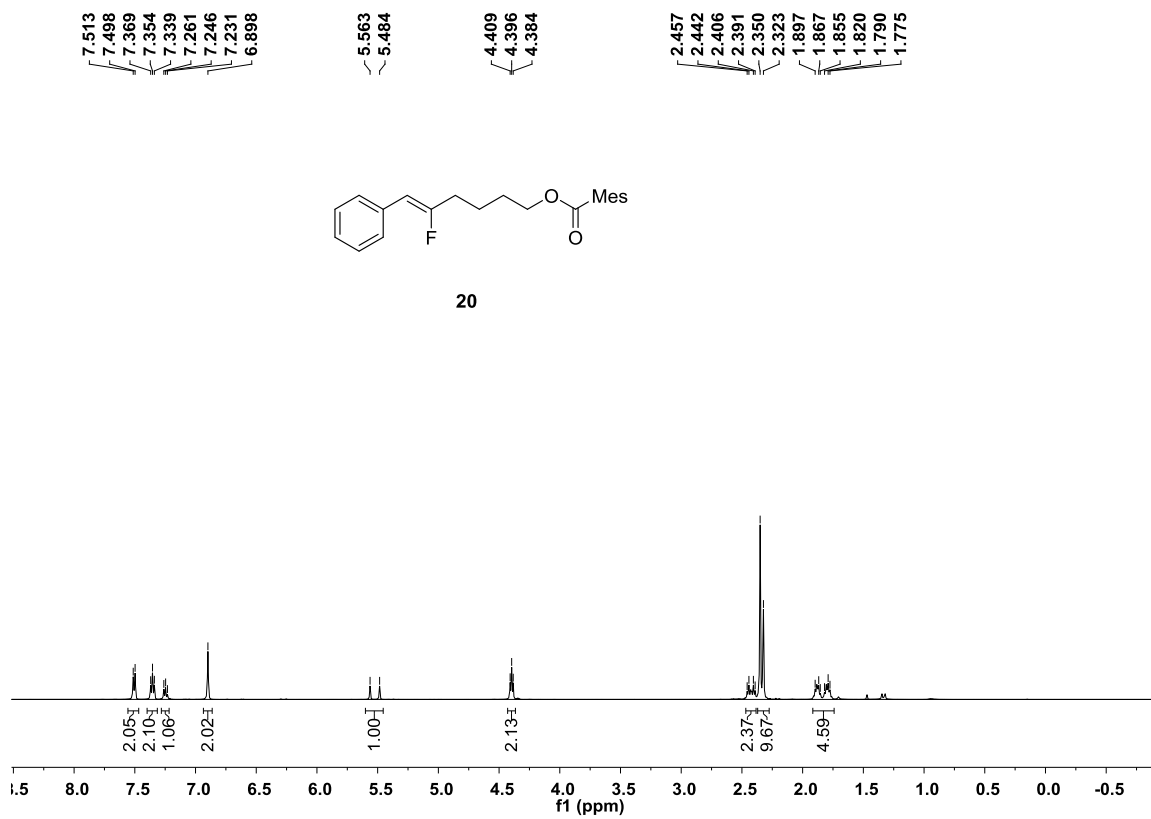

170.132  
 161.274  
 159.154  
 139.161  
 134.928  
 133.596  
 133.578  
 131.023  
 128.331  
 128.238  
 128.179  
 126.683  
 106.211  
 106.142  
 77.254  
 77.000  
 76.745  
 64.314  
 32.655  
 32.441  
 27.846  
 22.951  
 21.018  
 19.685

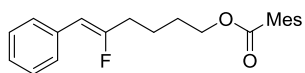

20

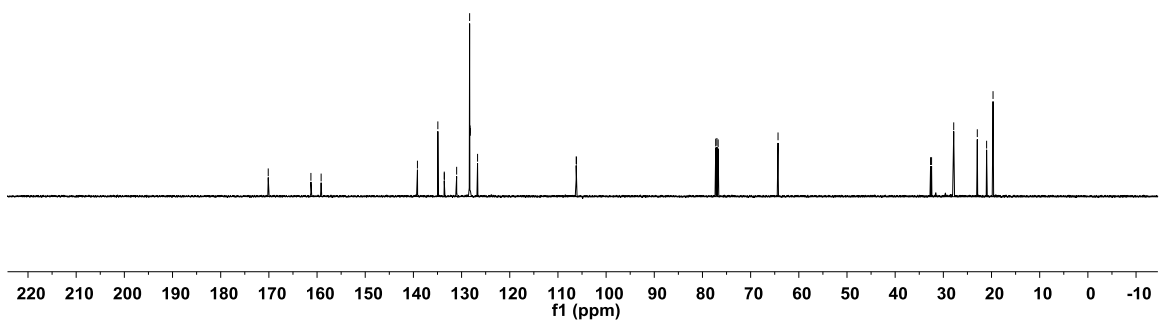

-101.308  
 -101.373  
 -101.438  
 -101.447  
 -101.512  
 -101.578

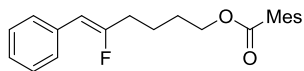

20

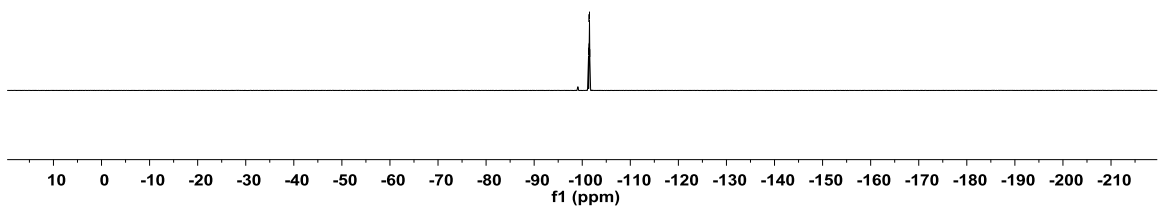

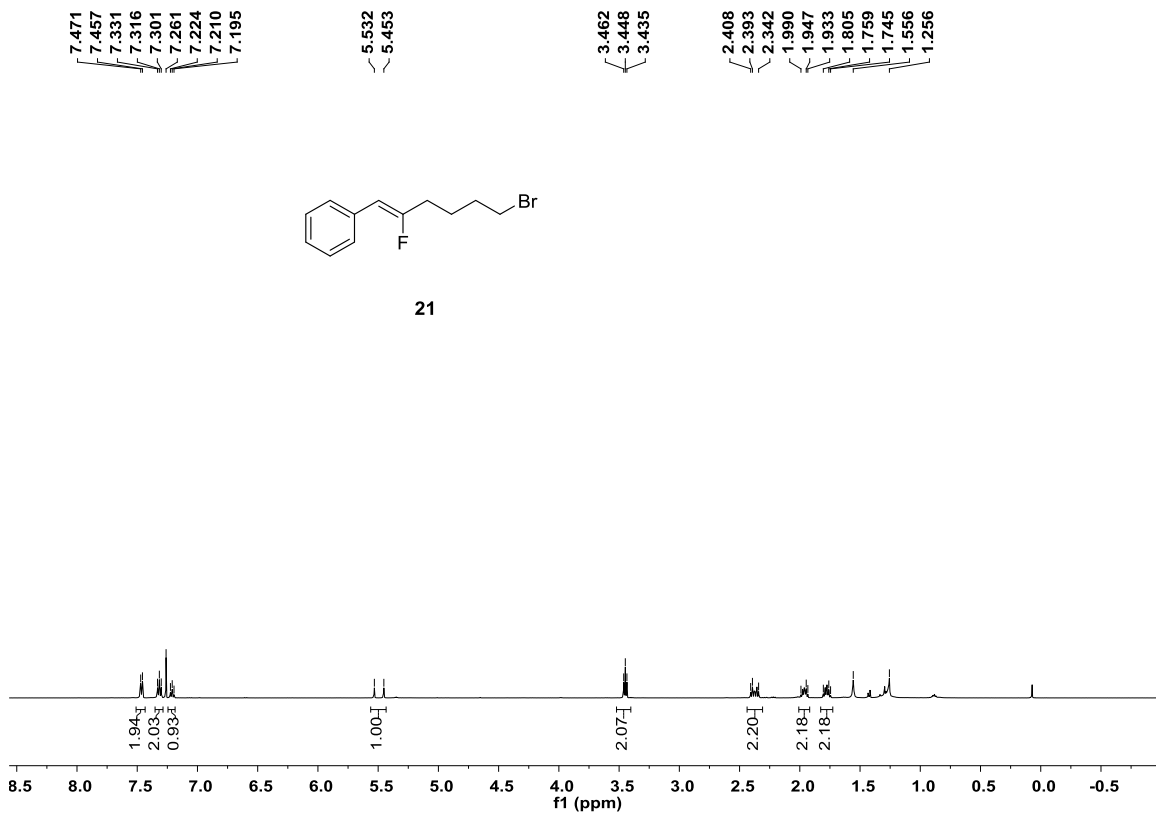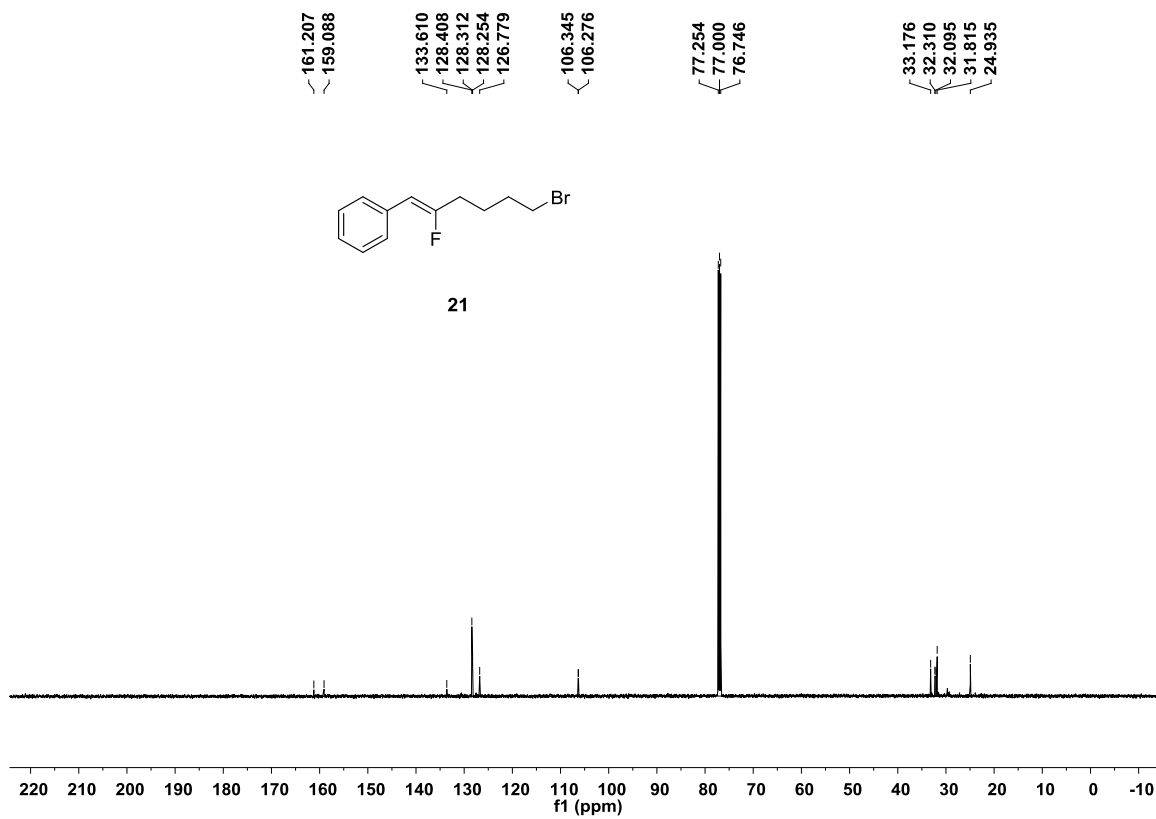



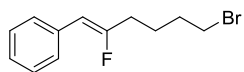

21

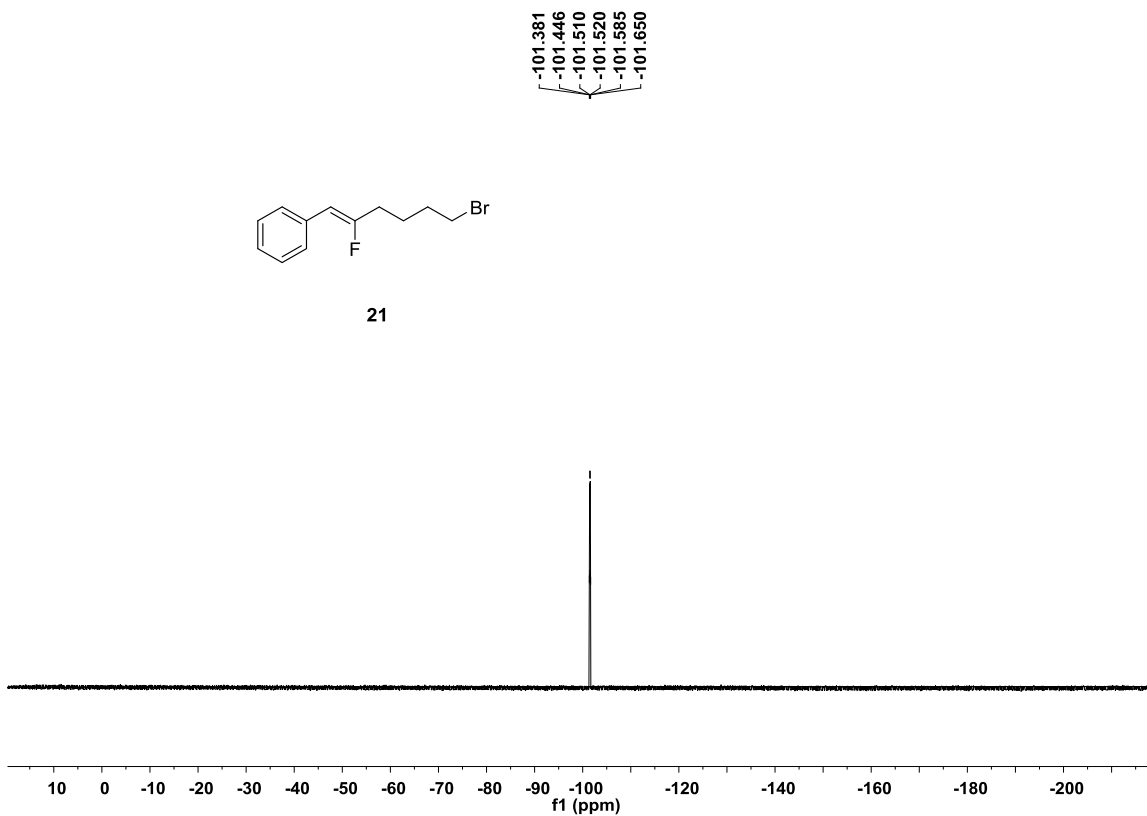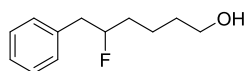

22

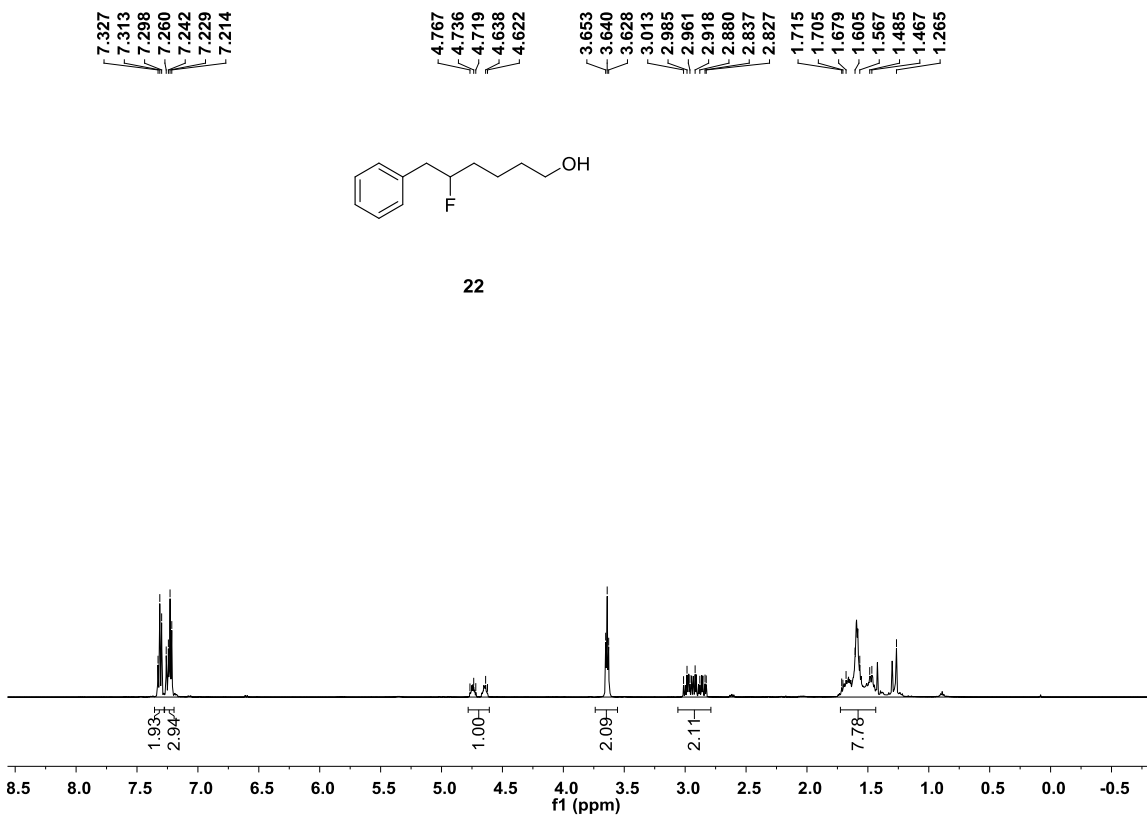

137.287  
137.249  
129.310  
128.386  
126.504

95.098  
93.739

77.254  
77.000  
76.746

62.613

41.662  
41.491  
34.413  
34.247  
32.359  
29.650  
21.380  
21.347

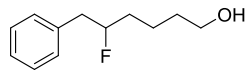

22

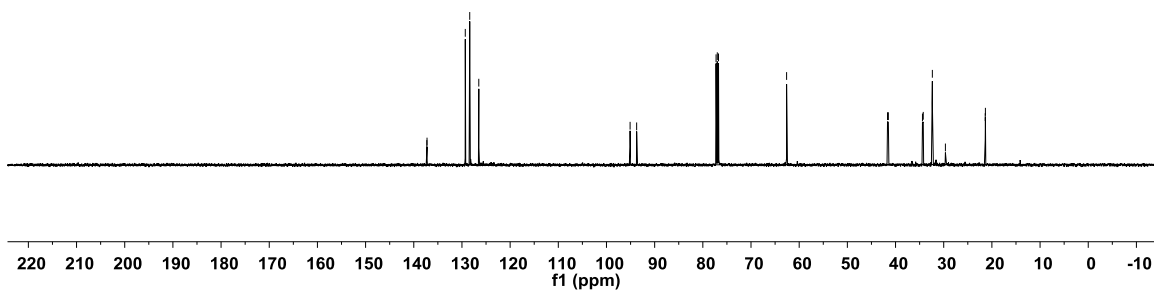

-178.559  
-178.627  
-178.652  
-178.732  
-178.763  
-178.825  
-178.893  
-178.997  
-179.064

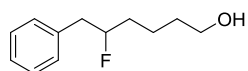

22

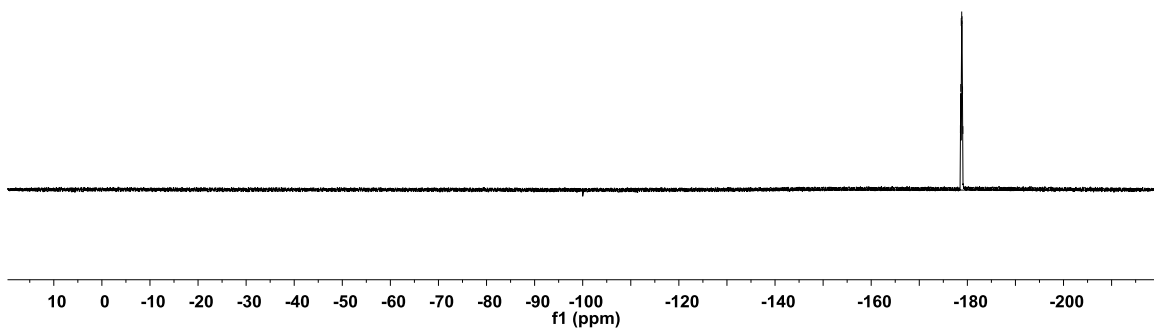

7.522  
7.516  
7.507  
7.368  
7.360  
7.357  
7.260

5.221  
5.172

3.735  
3.722  
3.710

2.579  
2.536  
2.519  
2.449  
2.432  
2.401  
2.357  
1.799  
1.769  
1.695  
1.682  
1.662  
1.596

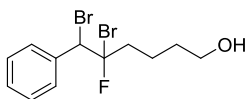

23

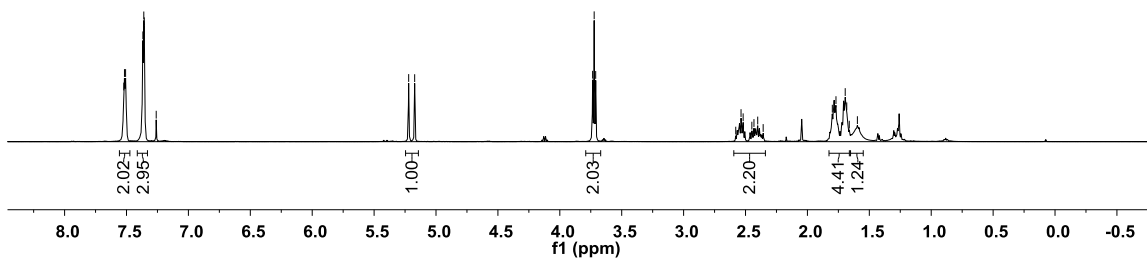

137.475  
129.809  
129.788  
129.092  
128.268  
112.883  
110.772

77.254  
77.000  
76.746

62.382  
57.817  
57.649

43.189  
43.026

31.825  
21.540  
21.497

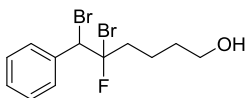

23

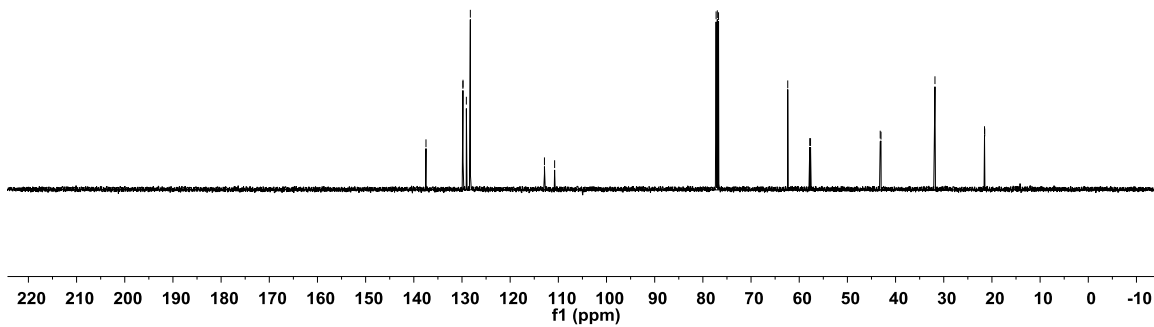

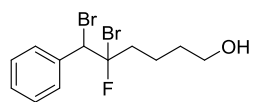

23

-108.514  
-108.589  
-108.663

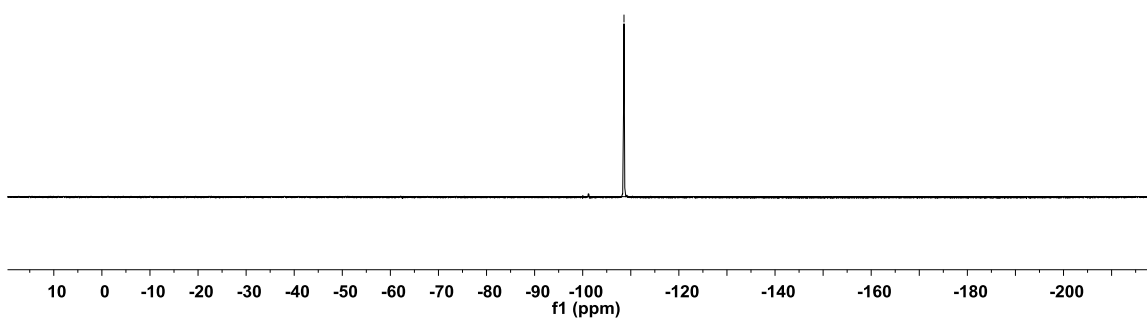

Supplement: SC-008-C7SC00483D-s001.pdf [file SC-008-C7SC00483D-s001.pdf]
